# Supplementary material
Source: PubMed Central journal article supplement (PMC9553869)
Supplement: 41416_2022_1923_MOESM1_ESM.pdf [file 41416_2022_1923_MOESM1_ESM.pdf]

S1 Table. The top 20 enriched pathways among 1890 tested proteins from overrepresentation test.

| Pathways                                                                                                                                   | fold Enrichment | raw P-value | FDR      |
|--------------------------------------------------------------------------------------------------------------------------------------------|-----------------|-------------|----------|
| <b>Reactome pathways</b>                                                                                                                   |                 |             |          |
| Immune System (R-HSA-168256)                                                                                                               | 2.41            | 2.67E-63    | 3.33E-60 |
| Cytokine Signaling in Immune system (R-HSA-1280215)                                                                                        | 3.09            | 1.49E-38    | 1.24E-35 |
| Signaling by Interleukins (R-HSA-449147)                                                                                                   | 3.66            | 3.67E-36    | 2.29E-33 |
| Innate Immune System (R-HSA-168249)                                                                                                        | 2.33            | 1.11E-29    | 5.52E-27 |
| Neutrophil degranulation (R-HSA-6798695)                                                                                                   | 3.01            | 6.12E-25    | 2.54E-22 |
| Signal Transduction (R-HSA-162582)                                                                                                         | 1.59            | 1.52E-17    | 5.4E-15  |
| Extracellular matrix organization (R-HSA-1474244)                                                                                          | 2.90            | 9.83E-15    | 3.06E-12 |
| Hemostasis (R-HSA-109582)                                                                                                                  | 2.13            | 8.98E-14    | 2.49E-11 |
| Signaling by Receptor Tyrosine Kinases (R-HSA-9006934)                                                                                     | 2.27            | 6.90E-13    | 1.72E-10 |
| Interleukin-4 and Interleukin-13 signaling (R-HSA-6785807)                                                                                 | 3.96            | 1.78E-11    | 4.03E-09 |
| Immunoregulatory interactions between a Lymphoid and a non-Lymphoid cell (R-HSA-198933)                                                    | 2.99            | 6.60E-11    | 1.37E-08 |
| Interleukin-6 family signaling (R-HSA-6783589)                                                                                             | 8.93            | 9.04E-11    | 1.73E-08 |
| Platelet activation, signaling and aggregation (R-HSA-76002)                                                                               | 2.60            | 5.27E-10    | 9.38E-08 |
| Metabolism of carbohydrates (R-HSA-71387)                                                                                                  | 2.47            | 9.91E-10    | 1.65E-07 |
| Disease (R-HSA-1643685)                                                                                                                    | 1.53            | 1.10E-09    | 1.71E-07 |
| Interleukin-12 family signaling (R-HSA-447115)                                                                                             | 4.98            | 2.04E-09    | 2.99E-07 |
| Regulation of Insulin-like Growth Factor (IGF) transport and uptake by Insulin-like Growth Factor Binding Proteins (IGFBPs) (R-HSA-381426) | 3.37            | 2.48E-09    | 3.44E-07 |
| Interleukin-10 signaling (R-HSA-6783783)                                                                                                   | 5.48            | 4.21E-09    | 5.53E-07 |
| Post-translational protein phosphorylation (R-HSA-8957275)                                                                                 | 3.51            | 7.05E-09    | 8.78E-07 |
| Axon guidance (R-HSA-422475)                                                                                                               | 1.93            | 1.18E-08    | 1.41E-06 |
| <b>PANTEHR pathways</b>                                                                                                                    |                 |             |          |
| Angiogenesis (P00005)                                                                                                                      | 3.61            | 6.80E-15    | 5.44E-13 |
| Interleukin signaling pathway (P00036)                                                                                                     | 3.97            | 1.50E-09    | 8.00E-08 |
| CCKR signaling map (P06959)                                                                                                                | 2.91            | 3.29E-09    | 1.32E-07 |
| Inflammation mediated by chemokine and cytokine signaling pathway (P00031)                                                                 | 2.42            | 1.45E-08    | 4.62E-07 |
| Apoptosis signaling pathway (P00006)                                                                                                       | 3.17            | 2.38E-08    | 5.45E-07 |
| EGF receptor signaling pathway (P00018)                                                                                                    | 3.02            | 2.07E-08    | 5.53E-07 |
| FGF signaling pathway (P00021)                                                                                                             | 2.87            | 6.25E-07    | 1.25E-05 |
| Ras Pathway (P04393)                                                                                                                       | 3.53            | 8.83E-07    | 1.57E-05 |
| VEGF signaling pathway (P00056)                                                                                                            | 3.47            | 4.90E-06    | 7.84E-05 |
| Integrin signalling pathway (P00034)                                                                                                       | 2.14            | 3.79E-05    | 5.52E-04 |
| Blood coagulation (P00011)                                                                                                                 | 3.73            | 4.60E-05    | 6.13E-04 |
| Parkinson disease (P00049)                                                                                                                 | 2.65            | 6.78E-05    | 8.35E-04 |
| Gonadotropin-releasing hormone receptor pathway (P06664)                                                                                   | 1.99            | 8.81E-05    | 1.01E-03 |
| Interferon-gamma signaling pathway (P00035)                                                                                                | 4.29            | 1.41E-04    | 1.50E-03 |
| Axon guidance mediated by semaphorins (P00007)                                                                                             | 5.1             | 1.67E-04    | 1.67E-03 |
| B cell activation (P00010)                                                                                                                 | 2.87            | 1.79E-04    | 1.68E-03 |
| Insulin/IGF pathway-mitogen activated protein kinase kinase/MAP kinase cascade (P00032)                                                    | 3.9             | 2.89E-04    | 2.57E-03 |
| TGF-beta signaling pathway (P00052)                                                                                                        | 2.42            | 5.22E-04    | 4.39E-03 |
| Endothelin signaling pathway (P00019)                                                                                                      | 2.52            | 5.98E-04    | 4.79E-03 |
| PDGF signaling pathway (P00047)                                                                                                            | 2.07            | 9.05E-04    | 6.89E-03 |
