# Supplementary material
Source: PubMed Central journal article supplement (PMC9553869)
Supplement: 41416_2022_1923_MOESM2_ESM.pdf [file 41416_2022_1923_MOESM2_ESM.pdf]

52 Table. Previously reported proteins, comparisons between the associations with risk of overall breast cancer and associations with risk of breast cancer subtypes: Full results from five MR approaches

| Protein   | Number of SNPs | Overall BC (From Shea et al., 2020) |        |                    |          |                        | Luminal A-like |                  |          |                    |                    | MRlocus clusters | MRlocus slope/alpha (95% Int) | Luminal B-like   |                   |                  |                       |                       |                  |       |                    |                    |          |                   |         |
|-----------|----------------|-------------------------------------|--------|--------------------|----------|------------------------|----------------|------------------|----------|--------------------|--------------------|------------------|-------------------------------|------------------|-------------------|------------------|-----------------------|-----------------------|------------------|-------|--------------------|--------------------|----------|-------------------|---------|
|           |                | GWAS OR (95% CI)                    | GWAS P | ICOSL1 OR (95% CI) | ICOSL1 P | Oncocarray OR (95% CI) | Oncocarray P   | IWW OR (95% CI)  | IWW P    | IWW FDR-adjusted P | Median OR (95% CI) |                  |                               | Median P         | Egger OR (95% CI) | Egger P          | MR-PRESSO OR (95% CI) | MR-PRESSO P           | IWW OR (95% CI)  | IWW P | IWW FDR-adjusted P | Median OR (95% CI) | Median P | Egger OR (95% CI) | Egger P |
| ADH1B     | 9              | 1.05 (0.95-1.16)                    | 0.33   | 1.07 (1.02-1.12)   | 0.008    | 1.07 (1.02-1.12)       | 0.005          | 1.05 (1.01-1.08) | 0.004    | 0.074              | 1.06 (1.02-1.09)   | 0.003            | 1.10 (1.02-1.18)              | 0.012            | 1.05 (1.01-1.08)  | 0.02             | 39                    | 0.002 (0.004, 0.007)  | 1.06 (0.99-1.14) | 0.882 | 0.928              | 1.07 (0.99-1.15)   | 0.099    | 1.09 (0.90-1.31)  |         |
| AKR1A1    | 16             | 0.95 (0.91-1.00)                    | 0.06   | 0.98 (0.95-1.00)   | 0.082    | 0.97 (0.95-1.00)       | 0.026          | 0.97 (0.95-1.00) | 0.035    | 0.398              | 0.98 (0.96-1.00)   | 0.119            | 0.97 (0.98-1.01)              | 0.155            | 0.97 (0.95-1.00)  | 0.052            | 29                    | 0.001 (0.005, 0.002)  | 1.00 (0.96-1.04) | 0.951 | 0.997              | 1.00 (0.95-1.04)   | 0.931    | 1.00 (0.94-1.06)  |         |
| ALP       | 3              | 1.01 (0.90-1.13)                    | 0.52   | 0.96 (0.81-0.92)   | 8.10E-06 | 0.91 (0.86-0.97)       | 0.002          | 0.90 (0.83-0.98) | 0.026    | 0.252              | 0.93 (0.97-0.99)   | 0.025            | 0.70 (0.48-1.01)              | 0.054            | NA                | NA               | 17                    | -0.018 (0.040, 0.006) | 0.77 (0.64-0.94) | 0.011 | 0.555              | 0.77 (0.67-0.88)   | 1.86E-04 | 1.52 (0.89-2.58)  |         |
| B3GNT2    | 9              | 1.01 (0.94-1.09)                    | 0.74   | 1.06 (1.02-1.11)   | 0.003    | 1.04 (1.01-1.08)       | 0.016          | 1.03 (0.99-1.07) | 0.117    | 0.494              | 1.02 (0.99-1.06)   | 0.203            | 1.08 (0.99-1.18)              | 0.08             | 1.03 (0.99-1.07)  | 0.156            | 32                    | 0.006 (0.002, 0.010)  | 1.01 (0.91-1.14) | 0.793 | 0.997              | 1.01 (0.94-1.08)   | 0.792    | 1.09 (0.82-1.45)  |         |
| BCAM      | 1              | 0.79 (0.68-0.92)                    | 0      | 0.91 (0.84-1.00)   | 0.033    | 0.95 (0.89-1.01)       | 0.075          | 0.92 (0.85-1.00) | 0.061    | 0.408              | NA                 | NA               | NA                            | NA               | NA                | NA               | 21                    | 0.037 (0.059, 0.014)  | 0.90 (0.74-1.09) | 0.265 | 0.997              | NA                 | NA       | NA                | NA      |
| C14orf111 | 12             | 1.06 (0.97-1.13)                    | 0.23   | 1.10 (1.01-1.16)   | 0.002    | 1.09 (1.04-1.14)       | 0.004          | 1.07 (1.04-1.10) | 4.21E-07 | 8.70E-05           | 1.07 (1.04-1.11)   | 8.81E-07         | 1.10 (0.88-1.36)              | 0.002            | 1.07 (1.04-1.10)  | 2.46E-04         | 38                    | 0.023 (0.002, 0.001)  | 1.04 (0.89-1.20) | 0.443 | 0.997              | 1.04 (0.98-1.10)   | 0.643    | 1.07 (0.97-1.19)  |         |
| CAMK1     | 13             | 0.97 (0.94-1.01)                    | 0.11   | 0.98 (0.96-1.00)   | 0.048    | 0.98 (0.96-0.99)       | 0.071          | 0.97 (0.96-0.99) | 0.006    | 0.374              | 0.97 (0.96-0.99)   | 0.001            | 0.97 (0.95-1.00)              | 0.031            | 0.97 (0.96-0.98)  | 4.41E-04         | 32                    | -0.004 (0.009, 0.002) | 1.01 (0.98-1.04) | 0.311 | 0.997              | 1.01 (0.98-1.05)   | 0.345    | 1.02 (0.96-1.08)  |         |
| CD36      | 1              | 0.84 (0.75-0.94)                    | 0      | 0.91 (0.86-0.97)   | 0.004    | 0.98 (0.93-1.03)       | 0.445          | 0.95 (0.91-1.00) | 0.054    | 0.379              | NA                 | NA               | NA                            | NA               | NA                | NA               | 21                    | -0.011 (0.015, 0.008) | 0.94 (0.85-1.05) | 0.307 | 0.997              | NA                 | NA       | NA                | NA      |
| CD55      | 13             | 0.96 (0.93-0.99)                    | 0      | 0.96 (0.93-0.99)   | 0.004    | 0.96 (0.93-0.99)       | 0.436          | 0.97 (0.95-1.00) | 0.013    | 0.392              | 0.97 (0.95-1.00)   | 0.013            | 0.99 (0.96-1.02)              | 0.483            | 0.96 (0.94-0.98)  | 0.003            | 32                    | 0.001 (0.004, 0.002)  | 1.02 (0.99-1.05) | 0.222 | 0.997              | 1.02 (0.98-1.07)   | 0.620    | 0.96 (0.93-1.03)  |         |
| CHST5     | 3              | 1.02 (0.90-1.15)                    | 0.78   | 0.87 (0.81-0.93)   | 2.01E-05 | 0.91 (0.81-0.96)       | 0.002          | 0.92 (0.83-1.02) | 0.114    | 0.488              | 0.92 (0.87-0.97)   | 0.001            | 0.74 (0.62-0.88)              | 0.001            | NA                | NA               | 34                    | 0.023 (0.038, 0.008)  | 0.92 (0.83-1.01) | 0.081 | 0.928              | 0.91 (0.82-1.01)   | 0.074    | 0.83 (0.59-1.16)  |         |
| CPNE1     | 12             | 0.93 (0.88-0.98)                    | 0      | 0.98 (0.95-1.00)   | 0.092    | 0.96 (0.94-0.99)       | 0.004          | 0.98 (0.96-0.99) | 0.005    | 0.085              | 0.97 (0.95-0.99)   | 0.012            | 0.98 (0.95-1.01)              | 0.207            | 0.98 (0.96-0.99)  | 0.011            | 28                    | 0.009 (0.015, 0.022)  | 0.96 (0.92-1.01) | 0.744 | 0.997              | 0.96 (0.92-1.01)   | 0.115    | 0.94 (0.87-1.01)  |         |
| CPH2B2    | 3              | 1.10 (0.90-1.36)                    | 0.35   | 1.17 (1.05-1.30)   | 0.005    | 1.17 (1.06-1.29)       | 0.002          | 1.02 (0.86-1.21) | 0.853    | 0.974              | 0.99 (0.91-1.08)   | 0.878            | 2.71 (1.64-4.54)              | 1.06E-04         | NA                | NA               | 19                    | 0.015 (0.001, 0.032)  | 1.02 (0.89-1.18) | 0.735 | 0.997              | 1.01 (0.87-1.18)   | 0.871    | 1.64 (0.93-3.04)  |         |
| CTSL      | 4              | 1.07 (0.97-1.19)                    | 0.2    | 1.10 (1.01-1.16)   | 0.002    | 1.05 (1.01-1.10)       | 0.023          | 1.04 (0.99-1.10) | 0.144    | 0.558              | 1.02 (0.98-1.08)   | 0.328            | 1.07 (0.81-1.39)              | 0.611            | 1.04 (0.99-1.10)  | 0.204            | 21                    | 0.028 (0.010, 0.057)  | 1.00 (0.92-1.09) | 0.967 | 0.997              | 0.99 (0.90-1.09)   | 0.828    | 1.17 (0.81-1.69)  |         |
| DOCK9     | 2              | 1.07 (0.93-1.23)                    | 0.35   | 1.11 (1.03-1.19)   | 0.005    | 1.11 (1.04-1.19)       | 0.002          | 1.06 (0.95-1.18) | 0.318    | 0.789              | NA                 | NA               | NA                            | NA               | NA                | NA               | 18                    | 0.018 (0.007, 0.042)  | 1.06 (0.95-1.19) | 0.283 | 0.997              | NA                 | NA       | NA                | NA      |
| ENG       | 1              | 0.86 (0.72-1.04)                    | 0.12   | 0.78 (0.70-0.86)   | 1.83E-06 | 0.87 (0.80-0.96)       | 0.004          | 0.82 (0.76-0.90) | 3.69E-04 |                    | 0.98 (0.95-1.01)   | 0.284            | 0.742                         | 1.00 (0.97-1.02) | 0.872             | 1.00 (0.98-1.01) | 0.907                 | -0.006 (0.016, 0.005) | 0.98 (0.92-1.04) | 0.501 | 0.997              | 1.01 (0.96-1.07)   | 0.646    | 1.06 (0.94-1.20)  |         |
| FAM17A1   | 4              | 1.01 (0.90-1.13)                    | 0.93   | 0.87 (0.82-0.92)   | 1.08E-05 | 0.92 (0.86-0.97)       | 0.003          | 0.90 (0.85-0.95) | 0.284    | 0.742              | 1.00 (0.97-1.02)   | 0.872            | 1.00 (0.98-1.01)              | 0.907            | 0.98 (0.95-1.01)  | 0.204            | 37                    | 0.006 (0.016, 0.005)  | 0.98 (0.92-1.04) | 0.501 | 0.997              | 1.01 (0.96-1.07)   | 0.646    | 1.06 (0.94-1.20)  |         |
| FAM20B    | 4              | 1.16 (0.97-1.38)                    | 0.1    | 1.24 (1.13-1.36)   | 6.50E-06 | 1.13 (1.04-1.23)       | 0.003          | 1.09 (0.99-1.21) | 0.09     | 0.463              | 1.14 (1.06-1.23)   | 3.35E-04         | 1.43 (1.11-1.68)              | 1.87E-05         | 1.09 (0.99-1.21)  | 0.188            | 24                    | 0.038 (0.018, 0.058)  | 1.05 (0.95-1.17) | 0.353 | 0.997              | 1.07 (0.94-1.21)   | 0.319    | 1.28 (0.90-1.82)  |         |
| FASLG     | 1              | 0.98 (0.80-1.20)                    | 0.85   | 0.87 (0.79-0.96)   | 0.006    | 0.88 (0.81-0.96)       | 0.005          | 0.90 (0.83-0.97) | 0.007    | 0.111              | NA                 | NA               | NA                            | NA               | NA                | NA               | 17                    | -0.043 (0.054, 0.031) | 0.96 (0.81-1.15) | 0.681 | 0.997              | NA                 | NA       | NA                | NA      |
| FLT4      | 27             | 0.99 (0.95-1.03)                    | 0.65   | 0.97 (0.93-0.99)   | 0.007    | 0.97 (0.95-0.99)       | 0.005          | 0.98 (0.96-1.00) | 0.026    | 0.254              | 1.00 (0.98-1.02)   | 0.567            | 0.98 (0.94-1.03)              | 0.528            | 0.98 (0.96-1.00)  | 0.035            | 50                    | -0.013 (0.020, 0.005) | 1.02 (0.99-1.05) | 0.129 | 0.997              | 1.02 (0.98-1.07)   | 0.269    | 0.99 (0.93-1.06)  |         |
| GAL       | 2              | 0.85 (0.70-1.03)                    | 0.1    | 0.87 (0.78-0.97)   | 0.01     | 0.90 (0.82-1.00)       | 0.049          | 0.95 (0.81-1.11) | 0.498    | 0.947              | NA                 | NA               | NA                            | NA               | NA                | NA               | 13                    | -0.014 (0.044, 0.016) | 0.89 (0.77-1.03) | 0.116 | 0.99               | NA                 | NA       | NA                | NA      |
| GOLM1     | 11             | 1.00 (0.94-1.07)                    | 0.94   | 1.05 (1.02-1.09)   | 0.004    | 1.04 (1.01-1.07)       | 0.017          | 1.06 (1.02-1.09) | 3.80E-04 | 0.014              | 1.08 (1.05-1.11)   | 1.63E-07         | 1.10 (1.02-1.18)              | 0.016            | 1.06 (1.02-1.09)  | 0.005            | 29                    | 0.002 (0.003, 0.007)  | 0.98 (0.90-1.07) | 0.696 | 0.997              | 1.05 (0.99-1.12)   | 0.105    | 1.14 (0.95-1.38)  |         |
| HTN1      | 3              | 1.09 (0.96-1.24)                    | 0.19   | 1.13 (1.06-1.21)   | 4.32E-04 | 1.06 (1.00-1.13)       | 0.044          | 1.00 (0.98-1.14) | 0.12     | 0.501              | 1.08 (1.03-1.14)   | 0.003            | 1.14 (0.88-1.48)              | 0.305            | NA                | NA               | 14                    | 0.001 (0.003, 0.005)  | 1.14 (1.04-1.25) | 0.005 | 0.374              | 1.14 (1.03-1.25)   | 0.013    | 1.13 (0.87-1.47)  |         |
| ICAM2     | 2              | 0.85 (0.70-1.03)                    | 0.1    | 0.79 (0.71-0.87)   | 6.50E-06 | 0.87 (0.80-0.95)       | 0.003          | 0.81 (0.75-0.88) | 3.65E-07 | 6.86E-05           | NA                 | NA               | NA                            | NA               | NA                | NA               | 20                    | 0.070 (0.121, 0.020)  | 0.90 (0.78-1.05) | 0.176 | 0.997              | NA                 | NA       | NA                | NA      |
| IGFBP1    | 1              | 0.85 (0.70-1.04)                    | 0.12   | 0.76 (0.68-0.85)   | 1.83E-06 | 0.86 (0.78-0.96)       | 0.004          | 0.81 (0.74-0.89) | 3.69E-06 | 3.93E-04           | NA                 | NA               | NA                            | NA               | NA                | NA               | 15                    | 0.040 (0.076, 0.004)  | 0.91 (0.75-1.11) | 0.356 | 0.997              | NA                 | NA       | NA                | NA      |
| IL3RA     | 18             | 0.96 (0.91-1.01)                    | 0.13   | 0.93 (0.91-0.96)   | 2.02E-06 | 0.96 (0.94-0.99)       | 0.003          | 0.94 (0.93-0.95) | 6.46E-20 | 1.30E-16           | 0.93 (0.93-0.97)   | 2.51E-08         | 0.96 (0.94-0.99)              | 0.004            | 0.94 (0.93-0.95)  | 5.72E-08         | 35                    | 0.015 (0.018, 0.011)  | 0.97 (0.94-1.00) | 0.027 | 0.738              | 0.97 (0.93-1.01)   | 0.107    | 0.97 (0.92-1.02)  |         |
| INSR      | 8              | 0.94 (0.88-1.02)                    | 0.12   | 0.90 (0.87-0.94)   | 2.24E-06 | 0.94 (0.91-0.98)       | 0.003          | 0.92 (0.90-0.95) | 8.55E-10 | 6.02E-07           | 0.92 (0.90-0.95)   | 3.00E-07         | 0.93 (0.91-0.97)              | 0.004            | 0.92 (0.90-0.95)  | 6.47E-04         | 26                    | -0.040 (0.046, 0.033) | 0.95 (0.88-0.99) | 0.015 | 0.634              | 0.96 (0.90-1.02)   | 0.213    | 0.98 (0.87-1.10)  |         |
| ILSR2     | 12             | 0.94 (0.87-1.02)                    | 0.12   | 0.91 (0.87-0.95)   | 3.34E-05 | 0.94 (0.90-0.97)       | 0.001          | 0.93 (0.89-0.96) | 1.18E-04 | 0.007              | 0.92 (0.89-0.95)   | 5.27E-07         | 0.94 (0.85-1.03)              | 0.18             | 0.93 (0.89-0.96)  | 0.003            | 23                    | -0.022 (0.041, 0.004) | 0.94 (0.90-0.99) | 0.013 | 0.634              | 0.95 (0.89-1.01)   | 0.086    | 0.95 (0.85-1.07)  |         |
| JAG1      | 4              | 1.07 (0.95-1.21)                    | 0.24   | 0.92 (0.86-0.99)   | 0.016    | 0.91 (0.86-0.97)       | 0.003          | 0.90 (0.84-0.96) | 0.002    | 0.055              | 0.92 (0.86-0.97)   | 0.005            | 0.96 (0.85-1.07)              | 0.847            | 0.90 (0.84-0.96)  | 0.055            | 25                    | -0.019 (0.047, 0.009) | 0.96 (0.85-1.08) | 0.492 | 0.997              | 0.91 (0.80-1.04)   | 0.16     | 0.98 (0.50-1.94)  |         |
| KDR       | 8              | 0.99 (0.93-1.05)                    | 0.69   | 0.95 (0.93-0.98)   | 0.003    | 0.97 (0.94-0.99)       | 0.018          | 0.94 (0.91-0.97) | 1.05E-04 | 0.006              | 0.93 (0.90-0.96)   | 2.55E-06         | 0.92 (0.86-0.97)              | 0.006            | 0.94 (0.91-0.97)  | 0.006            | 31                    | -0.019 (0.036, 0.002) | 0.97 (0.92-1.02) | 0.261 | 0.997              | 0.97 (0.91-1.03)   | 0.292    | 0.94 (0.85-1.04)  |         |
| KIN       | 9              | 0.96 (0.88-1.06)                    | 0.47   | 0.93 (0.87-0.97)   | 0.002    | 0.95 (0.91-0.99)       | 0.026          | 0.93 (0.88-0.98) | 0.008    | 0.119              | 0.93 (0.88-0.98)   | 0.009            | 0.92 (0.78-1.08)              | 0.001            | 0.93 (0.88-0.98)  | 0.057            | 23                    | 0.009 (0.012, 0.049)  | 0.94 (0.87-1.02) | 0.12  | 0.99               | 0.92 (0.83-1.01)   | 0.067    | 0.88 (0.69-1.03)  |         |
| KLRF1     | 1              | 1.13 (0.95-1.33)                    | 0.16   | 1.10 (1.01-1.20)   | 0.026    | 1.10 (1.02-1.18)       | 0.013          | 1.11 (1.01-1.22) | 0.033    | 0.296              | NA                 | NA               | NA                            | NA               | NA                | NA               | 10                    | -0.020 (0.048, 0.007) | 1.09 (0.89-1.35) | 0.388 | 0.997              | NA                 | NA       | NA                | NA      |
| LFR       | 1              | 0.89 (0.77-1.03)                    | 0.12   | 0.82 (0.75-0.89)   | 1.83E-06 | 0.90 (0.84-0.97)       | 0.004          | 0.86 (0.80-0.92) | 3.69E-06 | 3.93E-04           | NA                 | NA               | NA                            | NA               | NA                | NA               | 21                    | -0.028 (0.035, 0.021) | 0.94 (0.81-1.08) | 0.356 | 0.997              | NA                 | NA       | NA                | NA      |
| MAN2A2    | 5              | 1.07 (0.92-1.24)                    | 0.39   | 1.10 (1.01-1.18)   | 0.006    | 1.07 (1.01-1.14)       | 0.023          | 1.04 (0.96-1.12) | 0.345    | 0.818              | 1.02 (0.97-1.07)   | 0.537            | 0.87 (0.55-1.37)              | 0.514            | 1.04 (0.96-1.12)  | 0.398            | 24                    | 0.022 (0.013, 0.058)  | 1.04 (0.96-1.13) | 0.318 | 0.997              | 1.03 (0.94-1.13)   | 0.533    | 1.02 (0.66-1.59)  |         |
| MET       | 4              | 0.91 (0.81-1.02)</                  |        |                    |          |                        |                |                  |          |                    |                    |                  |                               |                  |                   |                  |                       |                       |                  |       |                    |                    |          |                   |         |

| Egger P | MR PRESSO OR (95% CI) | MR PRESSO P | MLocus clusters | MLocus slope alpha (95% Int) | Luminal & HER2 negative-like |                 |                        |                           |              |                           | HER2 enriched |                           |                 |                 |                              |                    |       |                    |                    |                    |                     |         |
|---------|-----------------------|-------------|-----------------|------------------------------|------------------------------|-----------------|------------------------|---------------------------|--------------|---------------------------|---------------|---------------------------|-----------------|-----------------|------------------------------|--------------------|-------|--------------------|--------------------|--------------------|---------------------|---------|
|         |                       |             |                 |                              | IWW OR (95% CI)              | IWW P           | IWW FDR-adjusted P     | Median OR (95% CI)        | Median P     | Egger OR (95% CI)         | Egger P       | MR PRESSO OR (95% CI)     | MR PRESSO P     | MLocus clusters | MLocus slope alpha (95% Int) | IWW OR (95% CI)    | IWW P | IWW FDR-adjusted P | Median OR (95% CI) | Median P           | Egger OR (95% CI)   | Egger P |
| 0.384   | 1.06 (0.99 - 1.14)    | 0.12        | 39              | 0.005 (0.006, 0.016)         | 1.06 (1.01 - 1.11)           | 0.029           | 0.388                  | 1.05 (0.99 - 1.12)        | 0.225        | 1.10 (0.96 - 1.26)        | 0.164         | 1.06 (1.01 - 1.11)        | 0.061           | 39              | -0.011 (-0.028, 0.006)       | 1.13 (1.02 - 1.25) | 0.018 | 0.58               | 1.21 (1.07 - 1.36) | 0.002              | 1.28 (1.00 - 1.65)  | 0.052   |
| 0.901   | 1.00 (0.91 - 1.03)    | 0.949       | 29              | -0.002 (-0.006, 0.003)       | 0.96 (0.94 - 0.99)           | 0.015           | 0.312                  | 0.97 (0.93 - 1.01)        | 0.113        | 0.95 (0.91 - 1.00)        | 0.068         | 0.96 (0.94 - 0.99)        | 0.021           | 29              | 0.003 (0.004, 0.009)         | 0.99 (0.94 - 1.04) | 0.624 | 0.999              | 0.97 (0.91 - 1.04) | 0.414              | 0.98 (0.89 - 1.08)  | 0.741   |
| 0.324   | NA                    | NA          | 17              | -0.007 (0.015, 0.029)        | 0.82 (0.76 - 1.08)           | 0.331           | 0.65                   | 0.89 (0.80 - 0.98)        | 0.036        | 0.53 (0.34 - 0.84)        | 0.007         | NA                        | NA              | 17              | -0.024 (0.061, 0.010)        | 0.86 (0.82 - 1.13) | 0.57  | 0.999              | 0.86 (0.81 - 1.13) | 0.603              | 0.86 (0.44 - 2.09)  | 0.922   |
| 0.542   | 1.01 (0.91 - 1.14)    | 0.08        | 32              | 0.044 (0.000, 0.088)         | 1.00 (0.96 - 1.05)           | 0.856           | 0.942                  | 1.00 (0.94 - 1.06)        | 0.918        | 1.07 (0.96 - 1.20)        | 0.218         | 1.00 (0.96 - 1.05)        | 0.845           | 32              | -0.004 (-0.016, 0.008)       | 0.94 (0.86 - 1.01) | 0.099 | 0.999              | 0.94 (0.84 - 1.04) | 0.223              | 1.02 (0.84 - 1.24)  | 0.845   |
| NA      | NA                    | NA          | 21              | -0.034 (0.058, 0.000)        | 1.02 (0.87 - 1.20)           | 0.773           | 0.899                  | NA                        | NA           | NA                        | NA            | NA                        | NA              | 21              | -0.007 (0.020, 0.006)        | 1.03 (0.79 - 1.35) | 0.833 | 0.999              | NA                 | NA                 | NA                  | NA      |
| 0.351   | 1.01 (0.98 - 1.04)    | 0.236       | 38              | -0.047 (0.006, 0.011)        | 1.04 (0.99 - 1.08)           | 0.036           | 0.447                  | 1.05 (0.99 - 1.11)        | 0.023        | 1.11 (0.92 - 1.21)        | 0.027         | 1.04 (1.00 - 1.08)        | 0.086           | 38              | -0.004 (-0.012, 0.009)       | 1.04 (0.98 - 1.11) | 0.235 | 0.999              | 1.05 (0.89 - 1.14) | 0.706              | 1.00 (0.84 - 1.25)  | 0.939   |
| 0.461   | 1.01 (0.98 - 1.04)    | 0.446       | 32              | -0.002 (0.004, 0.007)        | 0.97 (0.95 - 0.99)           | 0.014           | 0.401                  | 0.97 (0.94 - 1.00)        | 0.047        | 0.98 (0.93 - 1.03)        | 0.381         | 0.97 (0.95 - 0.99)        | 0.01            | 32              | -0.005 (-0.013, 0.003)       | 1.02 (0.97 - 1.06) | 0.442 | 0.999              | 1.01 (0.96 - 1.06) | 0.442              | 1.00 (0.93 - 1.09)  | 0.917   |
| 0.27    | 0.98 (0.90 - 0.99)    | 0.031       | 21              | -0.010 (-0.027, 0.007)       | 1.01 (0.92 - 1.11)           | 0.766           | 0.899                  | NA                        | NA           | NA                        | NA            | NA                        | NA              | 21              | -0.004 (-0.010, 0.002)       | 1.02 (0.87 - 1.19) | 0.828 | 0.999              | NA                 | NA                 | NA                  | NA      |
| 0.268   | NA                    | NA          | 17              | -0.011 (-0.029, 0.008)       | 1.09 (0.95 - 1.25)           | 0.413           | 0.624                  | 1.00 (0.97 - 1.05)        | 0.016        | 1.02 (0.94 - 1.08)        | 0.088         | 0.99 (0.96 - 1.01)        | 0.361           | 32              | -0.008 (-0.031, 0.016)       | 0.98 (0.94 - 1.08) | 0.311 | 0.999              | 1.01 (0.96 - 1.08) | 0.411              | 1.01 (0.80 - 1.14)  | 0.848   |
| 0.083   | 0.99 (0.98 - 1.03)    | 0.75        | 28              | -0.005 (-0.014, 0.004)       | 0.92 (0.89 - 0.96)           | 0.008           | 0.008                  | 0.92 (0.88 - 0.95)        | 0.735        | 0.95 (0.88 - 1.03)        | 0.191         | 0.92 (0.89 - 0.96)        | 0.001           | 28              | -0.010 (-0.085, 0.015)       | 0.92 (0.80 - 1.05) | 0.823 | 0.999              | 1.01 (0.95 - 1.08) | 0.685              | 1.05 (0.94 - 1.16)  | 0.409   |
| 0.391   | NA                    | NA          | 19              | 0.043 (0.002, 0.087)         | 1.10 (0.98 - 1.24)           | 0.114           | 0.536                  | 1.12 (0.98 - 1.29)        | 0.087        | 1.19 (0.46 - 1.12)        | 0.721         | NA                        | NA              | 19              | -0.008 (-0.031, 0.016)       | 1.27 (0.94 - 1.73) | 0.121 | 0.999              | 1.35 (1.05 - 1.72) | 0.018              | 3.70 (2.22 - 6.16)  | 0.362   |
| 0.411   | 1.00 (0.92 - 1.09)    | 0.969       | 37              | 0.051 (0.003, 0.103)         | 1.07 (1.00 - 1.14)           | 0.036           | 0.406                  | 1.08 (1.00 - 1.17)        | 0.051        | 1.17 (0.89 - 1.53)        | 0.263         | 1.07 (1.04 - 1.10)        | 0.007           | 21              | 1.04 (-0.92 - 1.18)          | 0.504              | 0.999 | 1.01 (0.89 - 1.18) | 0.84               | 1.44 (0.85 - 2.42) | 0.173               |         |
| NA      | NA                    | NA          | 18              | -0.004 (-0.013, 0.005)       | 1.05 (0.96 - 1.15)           | 0.302           | 0.65                   | NA                        | NA           | NA                        | NA            | NA                        | NA              | 18              | -0.010 (-0.020, 0.001)       | 1.26 (1.07 - 1.48) | 0.004 | 0.3                | NA                 | NA                 | NA                  | NA      |
| 0.171   | 1.05 (0.98 - 1.13)    | 0.261       | 24              | -0.024 (-0.052, 0.004)       | 1.03 (0.86 - 1.24)           | 0.718           | 0.873                  | 1.12 (1.00 - 1.27)        | 0.054        | 1.50 (0.90 - 2.52)        | 0.124         | 1.03 (0.86 - 1.24)        | 0.742           | 24              | 0.007 (-0.017, 0.031)        | 1.07 (0.92 - 1.25) | 0.358 | 0.999              | 1.11 (0.92 - 1.34) | 0.267              | 1.51 (0.90 - 2.53)  | 0.112   |
| NA      | NA                    | NA          | 17              | 0.014 (-0.018, 0.046)        | 0.93 (0.80 - 1.08)           | 0.337           | 0.65                   | NA                        | NA           | NA                        | NA            | NA                        | NA              | 17              | -0.037 (-0.076, 0.002)       | 0.88 (0.53 - 0.88) | 0.003 | 0.236              | NA                 | NA                 | NA                  | NA      |
| 0.827   | 1.02 (0.99 - 1.05)    | 0.141       | 50              | 0.001 (-0.001, 0.002)        | <b>0.95 (0.93 - 0.98)</b>    | <b>1.12E-04</b> | <b>0.003</b>           | <b>0.95 (0.93 - 0.98)</b> | <b>0.003</b> | <b>0.93 (0.88 - 0.98)</b> | <b>0.005</b>  | <b>0.95 (0.94 - 0.97)</b> | <b>3.64E-05</b> | 50              | -0.001 (-0.008, 0.002)       | 1.01 (0.97 - 1.05) | 0.641 | 0.999              | 0.99 (0.94 - 1.06) | 0.861              | 0.97 (0.88 - 1.06)  | 0.479   |
| NA      | NA                    | NA          | 13              | 0.008 (-0.012, 0.021)        | 1.03 (0.88 - 1.21)           | 0.701           | 0.863                  | NA                        | NA           | NA                        | NA            | NA                        | NA              | 13              | -0.017 (-0.043, 0.009)       | 0.96 (0.78 - 1.18) | 0.709 | 0.999              | NA                 | NA                 | NA                  | NA      |
| 0.161   | 0.98 (0.90 - 1.07)    | 0.704       | 29              | -0.012 (-0.024, 0.011)       | 1.04 (1.00 - 1.08)           | 0.039           | 0.406                  | 1.06 (1.01 - 1.12)        | 0.015        | 1.09 (0.99 - 1.20)        | 0.062         | 1.04 (1.00 - 1.08)        | 0.066           | 29              | 0.004 (-0.004, 0.012)        | 0.99 (0.89 - 1.09) | 0.794 | 0.999              | 1.00 (0.92 - 1.09) | 0.92               | 1.03 (0.80 - 1.14)  | 0.812   |
| 0.372   | NA                    | NA          | 14              | 0.005 (-0.007, 0.017)        | 1.11 (1.03 - 1.20)           | 0.007           | 0.205                  | 1.11 (1.01 - 1.21)        | 0.022        | 1.09 (0.87 - 1.37)        | 0.442         | NA                        | NA              | 14              | -0.009 (-0.025, 0.008)       | 1.11 (0.97 - 1.26) | 0.131 | 0.999              | 1.10 (0.95 - 1.27) | 0.205              | 1.04 (0.74 - 1.52)  | 0.854   |
| NA      | NA                    | NA          | 20              | 0.013 (-0.017, 0.043)        | 0.86 (0.76 - 0.97)           | 0.014           | 0.301                  | NA                        | NA           | NA                        | NA            | NA                        | NA              | 20              | -0.028 (-0.051, -0.005)      | 0.80 (0.63 - 1.03) | 0.054 | 0.845              | NA                 | NA                 | NA                  | NA      |
| 0.259   | 0.97 (0.95 - 0.98)    | 0.002       | 35              | -0.002 (-0.004, 0.000)       | 0.97 (0.94 - 0.99)           | 0.005           | 0.182                  | 0.96 (0.92 - 0.99)        | 0.012        | 0.96 (0.92 - 1.01)        | 0.131         | 0.97 (0.95 - 0.98)        | 0.001           | 35              | -0.001 (-0.003, 0.001)       | 0.98 (0.94 - 1.02) | 0.347 | 0.999              | 0.97 (0.91 - 1.02) | 0.324              | 0.98 (0.89 - 1.07)  | 0.629   |
| 0.756   | 0.93 (0.90 - 0.96)    | 0.003       | 26              | -0.011 (-0.024, 0.001)       | <b>0.94 (0.88 - 0.98)</b>    | <b>0.007</b>    | <b>0.199</b>           | <b>0.94 (0.88 - 0.99)</b> | <b>0.022</b> | <b>0.92 (0.83 - 1.02)</b> | <b>0.121</b>  | <b>0.94 (0.88 - 0.96)</b> | <b>0.001</b>    | 26              | <b>0.018 (0.008, 0.029)</b>  | 0.96 (0.88 - 1.05) | 0.388 | 0.999              | 0.95 (0.86 - 1.05) | 0.323              | 0.91 (0.75 - 1.11)  | 0.364   |
| 0.41    | 0.94 (0.92 - 0.97)    | 0.001       | 23              | -0.011 (-0.019, 0.003)       | 0.97 (0.93 - 1.02)           | 0.285           | 0.65                   | 0.96 (0.91 - 1.02)        | 0.178        | 0.94 (0.84 - 1.05)        | 0.285         | 0.97 (0.93 - 1.02)        | 0.308           | 23              | -0.009 (-0.021, 0.003)       | 0.98 (0.91 - 1.05) | 0.587 | 0.999              | 1.01 (0.92 - 1.10) | 0.884              | 0.97 (0.81 - 1.17)  | 0.772   |
| 0.963   | 0.96 (0.85 - 1.08)    | 0.541       | 25              | 0.006 (-0.005, 0.017)        | 0.98 (0.85 - 1.14)           | 0.836           | 0.929                  | 0.99 (0.88 - 1.11)        | 0.816        | 1.13 (0.49 - 2.62)        | 0.769         | 0.98 (0.85 - 1.14)        | 0.85            | 25              | 0.017 (0.008, 0.066)         | 0.98 (0.85 - 1.12) | 0.76  | 0.999              | 0.95 (0.81 - 1.11) | 0.924              | 1.13 (0.59 - 2.16)  | 0.719   |
| 0.216   | 0.97 (0.93 - 1.01)    | 0.206       | 31              | 0.001 (-0.003, 0.006)        | 0.93 (0.89 - 0.97)           | 0.002           | 0.107                  | 0.94 (0.89 - 0.99)        | 0.018        | 0.94 (0.86 - 1.03)        | 0.183         | 0.93 (0.92 - 0.95)        | 3.70E-05        | 31              | 0.011 (0.008, 0.010)         | 0.97 (0.90 - 1.05) | 0.506 | 0.999              | 0.97 (0.88 - 1.06) | 0.469              | 0.89 (0.77 - 1.03)  | 0.123   |
| 0.099   | 0.94 (0.88 - 1.00)    | 0.121       | 23              | -0.001 (-0.006, 0.004)       | 0.94 (0.88 - 1.00)           | 0.05            | 0.406                  | 0.94 (0.88 - 1.00)        | 0.052        | 0.94 (0.79 - 1.11)        | 0.442         | 0.94 (0.89 - 0.99)        | 0.077           | 23              | -0.036 (-0.071, -0.002)      | 0.98 (0.88 - 1.10) | 0.779 | 0.999              | 0.99 (0.87 - 1.14) | 0.926              | 0.84 (0.74 - 1.12)  | 0.918   |
| NA      | NA                    | NA          | 10              | -0.020 (-0.052, 0.013)       | 1.15 (0.96 - 1.37)           | 0.127           | 0.552                  | NA                        | NA           | NA                        | NA            | NA                        | NA              | 10              | 0.004 (-0.007, 0.015)        | 1.42 (1.04 - 1.92) | 0.025 | 0.617              | NA                 | NA                 | NA                  | NA      |
| 0.927   | 1.04 (1.01 - 1.07)    | 0.053       | 24              | 0.017 (0.000, 0.034)         | 0.88 (0.78 - 1.00)           | 0.048           | 0.406                  | 1.02 (0.94 - 1.12)        | 0.035        | 0.73 (0.47 - 1.13)        | 0.155         | 1.03 (0.84 - 1.13)        | 0.602           | 24              | -0.018 (-0.047, 0.011)       | 0.91 (0.74 - 1.12) | 0.39  | 0.999              | NA                 | NA                 | NA                  | NA      |
| NA      | NA                    | NA          | 0.8             | 0.93 (0.88 - 0.98)           | 0.072                        | 23              | -0.015 (-0.026, 0.005) | 0.90 (0.84 - 0.97)        | 0.009        | 0.92 (0.77 - 1.15)        | 0.559         | 0.90 (0.85 - 0.96)        | 0.052           | 23              | -0.043 (-0.066, 0.021)       | 1.07 (0.95 - 1.20) | 0.268 | 0.999              | 1.10 (0.95 - 1.27) | 0.199              | 1.07 (0.87 - 2.04)  | 0.825   |
| NA      | NA                    | NA          | 19              | -0.023 (-0.043, 0.003)       | 1.02 (0.88 - 1.19)           | 0.787           | 0.906                  | NA                        | NA           | NA                        | NA            | NA                        | NA              | 19              | 0.001 (0.002, 0.004)         | 0.97 (0.84 - 1.12) | 0.653 | 0.999              | 0.98 (0.85 - 1.13) | 0.753              | 0.90 (0.56 - 1.44)  | 0.662   |
| 0.419   | 1.03 (0.99 - 1.06)    | 0.12        | 48              | 0.010 (0.002, 0.017)         | 1.03 (1.00 - 1.06)           | 0.051           | 0.406                  | 1.03 (0.99 - 1.08)        | 0.219        | 1.03 (0.96 - 1.10)        | 0.383         | 1.03 (1.00 - 1.06)        | 0.062           | 48              | -0.002 (-0.008, 0.001)       | 1.03 (0.80 - 1.32) | 0.835 | 0.999              | NA                 | NA                 | NA                  | NA      |
| 0.721   | 0.99 (0.94 - 1.05)    | 0.883       | 19              | -0.004 (-0.013, 0.005)       | 1.02 (0.97 - 1.06)           | 0.491           | 0.728                  | 1.00 (0.95 - 1.06)        | 0.883        | 1.01 (0.92 - 1.11)        | 0.853         | 1.02 (0.97 - 1.06)        | 0.478           | 19              | 0.009 (0.003, 0.011)         | 1.02 (0.84 - 1.20) | 0.032 | 0.733              | 0.92 (0.84 - 1.02) | 0.1                | 0.91 (0.76 - 1.08)  | 0.291   |
| 0.021   | 0.96 (0.91 - 1.01)    | 0.179       | 22              | 0.004 (-0.003, 0.071)        | 1.03 (0.96 - 1.11)           | 0.355           | 0.65                   | 1.02 (0.96 - 1.09)        | 0.532        | 0.95 (0.79 - 1.14)        | 0.556         | 1.03 (0.96 - 1.11)        | 0.377           | 22              | 0.016 (0.000, 0.112)         | 0.95 (0.88 - 1.03) | 0.231 | 0.999              | 0.94 (0.85 - 1.05) | 0.289              | 1.11 (0.90 - 1.38)  | 0.327   |
| 0.056   | 1.02 (1.00 - 1.04)    | 0.06        | 39              | 0.002 (-0.001, 0.005)        | 1.03 (1.01 - 1.05)           | 0.006           | 0.194                  | 1.04 (1.01 - 1.07)        | 0.014        | 1.05 (1.01 - 1.09)        | 0.024         | 1.03 (1.01 - 1.05)        | 0.802           | 39              | -0.001 (-0.002, 0.001)       | 0.99 (0.95 - 1.04) | 0.738 | 0.999              | 1.01 (0.96 - 1.07) | 0.519              | 1.07 (0.87 - 1.17)  | 0.158   |
| NA      | NA                    | NA          | 18              | -0.027 (-0.064, 0.010)       | 1.09 (1.01 - 1.17)           | 0.031           | 0.394                  | NA                        | NA           | NA                        | NA            | NA                        | NA              | 18              | 0.008 (0.001, 0.008)         | 1.06 (0.93 - 1.21) | 0.383 | 0.999              | NA                 | NA                 | NA                  | NA      |
| 0.859   | NA                    | NA          | 16              | 0.050 (-0.009, 0.110)        | 0.93 (0.85 - 1.02)           | 0.13            | 0.554                  | 0.95 (0.86 - 1.05)        | 0.319        | 0.81 (0.24 - 2.65)        | 0.722         | NA                        | NA              | 16              | -0.022 (-0.009, 0.005)       | 0.93 (0.80 - 1.08) | 0.339 | 0.999              | 0.94 (0.80 - 1.10) | 0.431              | 2.89 (0.58 - 14.39) | 0.195   |
| 0.382   | 1.04 (1.01 - 1.08)    | 0.062       | 23              | 0.008 (-0.007, 0.022)        | 1.08 (1.02 - 1.14)           | 0.012           | 0.3                    | 1.09 (1.02 - 1.16)        | 0.01         | 1.14 (1.00 - 1.30)        | 0.045         | 1.08 (1.04 - 1.11)        | 0.011           | 23              | 0.001 (0.001, 0.003)         | 1.01 (0.92 - 1.11) | 0.838 | 0.999              | 1.00 (0.90 - 1.12) | 0.939              | 0.98 (0.76 - 1.25)  | 0.846   |
| 0.304   | 0.95 (0.88 - 1.02)    | 0.259       | 20              | -0.004 (-0.015, 0.008)       | 1.01 (0.91 - 1.12)           | 0.881           | 0.955                  | 1.00 (0.90 - 1.10)        | 0.985        | 1.20 (0.68 - 18.00)       | 0.894         | 1.01 (0.91 - 1.12)        | 0.89            | 20              | 0.001 (0.002, 0.004)         | 1.00 (0.86 - 1.17) | 0.963 | 0.999              | 1.01 (0.85 - 1.21) | 0.893              | 1.64 (0.66 - 43.61) | 0.768   |
| 0.422   | 0.97 (0.95 - 0.99)    | 0.012       | 37              | -0.001 (-0.003, 0.001)       | 0.96 (0.94 - 0.98)           | 0.001           | 0.082                  | 0.97 (0.94 - 1.00)        | 0.027        | 0.96 (0.93 - 1.00)        | 0.045         | 0.96 (0.95 - 0.98)        | 6.42E-05        | 37              | 0.000 (-0.001, 0.000)        | 0.99 (0.95 - 1.03) | 0.702 | 0.999              | 0.97 (0.93 - 1.02) | 0.276              | 0.95 (0.88 - 1.01)  | 0.118   |
| 0.856   | 0.98 (0.95 - 1.01)    | 0.162       | 38              | -0.034 (-0.055, -0.012)      | 0.99 (0.95 - 1.03)           | 0.621           | 0.812                  | 0.99 (0.94 - 1.           |              |                           |               |                           |                 |                 |                              |                    |       |                    |                    |                    |                     |         |

| MR PRESSO OR (95% CI) | MR PRESSO P     | MR Locus clusters | MR Locus slope alpha (95% Int) | Triplet negative          |                 |                     |                           |                 |                           |              |                           |                 |                   |                                |  |
|-----------------------|-----------------|-------------------|--------------------------------|---------------------------|-----------------|---------------------|---------------------------|-----------------|---------------------------|--------------|---------------------------|-----------------|-------------------|--------------------------------|--|
|                       |                 |                   |                                | I/VW OR (95% CI)          | I/VW P          | I/VW FDR adjusted P | Median OR (95% CI)        | Median P        | Egger OR (95% CI)         | Egger P      | MR PRESSO OR (95% CI)     | MR PRESSO P     | MR Locus clusters | MR Locus slope alpha (95% Int) |  |
| 1.13 (1.02 - 1.25)    | 0.046           | 39                | -0.019 (0.056, 0.018)          | <b>1.12 (1.07 - 1.18)</b> | <b>1.53E-05</b> | <b>0.002</b>        | <b>1.13 (1.06 - 1.21)</b> | <b>3.52E-04</b> | 1.15 (1.00 - 1.33)        | 0.054        | 1.12 (1.07 - 1.18)        | <b>0.003</b>    | 39                | <b>0.053 (0.019, 0.087)</b>    |  |
| 0.99 (0.94 - 1.04)    | 0.631           | 29                | -0.007 (0.015, 0.000)          | 1.02 (0.98 - 1.05)        | 0.309           | 0.732               | 1.02 (0.97 - 1.06)        | 0.465           | 1.00 (0.94 - 1.06)        | 0.989        | 1.02 (0.98 - 1.05)        | 0.325           | 29                | -0.002 (-0.007, 0.003)         |  |
| NA                    | NA              | 17                | -0.070 (0.151, -0.006)         | 0.95 (0.78 - 1.16)        | 0.632           | 0.933               | 1.02 (0.91 - 1.16)        | 0.713           | 0.53 (0.25 - 1.13)        | 0.091        | NA                        | NA              | 17                | -0.005 (-0.025, 0.014)         |  |
| 0.94 (0.87 - 1.01)    | 0.119           | 32                | -0.057 (0.093, -0.021)         | <b>1.08 (1.03 - 1.13)</b> | <b>0.002</b>    | <b>0.09</b>         | <b>1.07 (1.01 - 1.14)</b> | <b>0.026</b>    | <b>1.04 (0.93 - 1.17)</b> | <b>0.504</b> | <b>1.08 (1.03 - 1.12)</b> | <b>0.007</b>    | <b>32</b>         | <b>0.022 (0.001, 0.044)</b>    |  |
| NA                    | NA              | 21                | 0.105 (0.044, 0.168)           | 0.91 (0.78 - 1.07)        | 0.273           | 0.724               | NA                        | NA              | NA                        | NA           | NA                        | NA              | 21                | -0.037 (-0.057, -0.017)        |  |
| 1.04 (0.99 - 1.10)    | 0.175           | 38                | -0.009 (0.021, -0.009)         | <b>1.15 (1.06 - 1.24)</b> | <b>6.37E-05</b> | <b>0.007</b>        | <b>1.09 (1.03 - 1.15)</b> | <b>0.001</b>    | 1.12 (0.98 - 1.26)        | 0.069        | <b>1.15 (1.05 - 1.16)</b> | <b>0.002</b>    | <b>38</b>         | <b>0.020 (0.003, 0.037)</b>    |  |
| 1.02 (0.98 - 1.05)    | 0.393           | 32                | 0.005 (0.003, 0.014)           | 0.98 (0.95 - 1.00)        | 0.087           | 0.087               | 0.99 (0.96 - 1.02)        | 0.36            | 1.01 (0.96 - 1.06)        | 0.631        | 0.98 (0.96 - 1.00)        | 0.082           | 32                | -0.002 (-0.007, 0.002)         |  |
| NA                    | NA              | 21                | -0.008 (0.024, 0.008)          | 0.95 (0.86 - 1.04)        | 0.284           | 0.724               | NA                        | NA              | NA                        | NA           | NA                        | NA              | 21                | -0.002 (-0.010, 0.005)         |  |
| 0.98 (0.92 - 1.05)    | 0.177           | 32                | 0.015 (0.011, 0.041)           | 0.91 (0.83 - 0.99)        | 0.01            | 0.246               | 0.97 (0.93 - 1.01)        | 0.01            | 0.74 (0.68 - 0.80)        | 0.014        | 0.96 (0.90 - 0.99)        | 0.019           | 32                | -0.002 (-0.011, 0.005)         |  |
| 0.99 (0.96 - 1.03)    | 0.767           | 28                | -0.029 (0.049, -0.009)         | <b>0.93 (0.79 - 1.10)</b> | <b>0.392</b>    | <b>0.751</b>        | <b>0.91 (0.82 - 1.00)</b> | <b>0.052</b>    | <b>0.62 (0.46 - 0.83)</b> | <b>0.001</b> | NA                        | NA              | 28                | -0.039 (0.053, -0.025)         |  |
| NA                    | NA              | 19                | 0.090 (0.95 - 1.03)            | 0.99 (0.95 - 1.03)        | 0.527           | 0.853               | 0.95 (0.92 - 1.00)        | 0.032           | 0.93 (0.87 - 0.99)        | 0.037        | 0.99 (0.95 - 1.03)        | 0.54            | 28                | -0.005 (-0.013, 0.002)         |  |
| 1.04 (0.92 - 1.19)    | 0.534           | 23                | 0.033 (0.140, 0.073)           | 1.06 (0.78 - 1.43)        | 0.721           | 0.935               | 0.97 (0.83 - 1.13)        | 0.702           | 5.77 (2.17 - 15.38)       | 4.58E-04     | NA                        | NA              | 19                | 0.002 (0.006, 0.010)           |  |
| NA                    | NA              | 18                | 0.042 (0.016, 0.069)           | 1.07 (1.00 - 1.14)        | 0.039           | 0.505               | 1.09 (1.00 - 1.18)        | 0.038           | 1.15 (0.88 - 1.51)        | 0.315        | 1.07 (1.02 - 1.12)        | 0.037           | 21                | 0.021 (0.000, 0.047)           |  |
| 0.95 (0.90 - 1.01)    | 0.136           | 37                | -0.001 (0.004, -0.002)         | <b>1.18 (1.07 - 1.30)</b> | <b>0.001</b>    | <b>0.045</b>        | NA                        | NA              | NA                        | NA           | NA                        | NA              | 18                | <b>0.034 (0.016, 0.052)</b>    |  |
| 1.07 (0.94 - 1.23)    | 0.358           | 24                | 0.052 (0.019, 0.086)           | 0.81 (0.70 - 0.95)        | 0.009           | 0.233               | NA                        | NA              | NA                        | NA           | NA                        | NA              | 15                | -0.041 (-0.087, 0.004)         |  |
| NA                    | NA              | 17                | -0.140 (0.188, -0.092)         | 1.15 (1.05 - 1.26)        | 0.003           | 0.122               | 1.18 (1.05 - 1.33)        | 0.004           | 1.40 (1.03 - 1.90)        | 0.033        | 1.15 (1.06 - 1.25)        | 0.044           | 24                | -0.048 (-0.134, 0.038)         |  |
| 1.01 (0.97 - 1.05)    | 0.684           | 50                | -0.007 (0.021, 0.007)          | <b>0.77 (0.66 - 0.89)</b> | <b>0.001</b>    | <b>0.045</b>        | NA                        | NA              | NA                        | NA           | NA                        | NA              | 17                | <b>-0.144 (0.182, -0.105)</b>  |  |
| 0.99 (0.89 - 1.09)    | 0.799           | 29                | 0.055 (0.008, 0.103)           | 0.97 (0.84 - 1.01)        | 0.118           | 0.622               | 0.98 (0.95 - 1.02)        | 0.434           | 1.01 (0.93 - 1.08)        | 0.886        | 0.97 (0.94 - 1.01)        | 0.13            | 50                | 0.017 (0.000, 0.034)           |  |
| NA                    | NA              | 13                | -0.024 (0.029, 0.048)          | 1.00 (0.78 - 1.29)        | 0.974           | 0.989               | NA                        | NA              | NA                        | NA           | NA                        | NA              | 13                | -0.055 (-0.119, 0.008)         |  |
| 0.98 (0.94 - 1.02)    | 0.361           | 35                | -0.020 (0.049, 0.009)          | <b>1.11 (1.07 - 1.15)</b> | <b>9.12E-08</b> | <b>4.02E-05</b>     | <b>1.09 (1.04 - 1.15)</b> | <b>0.001</b>    | <b>1.08 (0.98 - 1.18)</b> | <b>0.107</b> | <b>1.11 (1.07 - 1.15)</b> | <b>1.50E-04</b> | 29                | 0.002 (0.004, 0.008)           |  |
| 0.96 (0.91 - 1.05)    | 0.598           | 23                | 0.031 (0.036, 0.014)           | 1.02 (0.93 - 1.13)        | 0.625           | 0.913               | 1.02 (0.93 - 1.11)        | 0.719           | 1.24 (0.99 - 1.56)        | 0.064        | NA                        | NA              | 14                | 0.003 (0.006, 0.012)           |  |
| 0.98 (0.91 - 1.08)    | 0.692           | 25                | 0.089 (0.062, 0.062)           | 0.80 (0.68 - 0.95)        | 0.009           | 0.233               | 0.81 (0.72 - 0.92)        | 0.001           | 0.86                      | NA           | NA                        | NA              | 15                | 0.007 (0.016, 0.030)           |  |
| 0.97 (0.91 - 1.05)    | 0.512           | 31                | -0.012 (0.018, 0.039)          | <b>0.93 (0.90 - 0.95)</b> | <b>6.99E-10</b> | <b>6.96E-07</b>     | <b>0.94 (0.91 - 0.97)</b> | <b>0.001</b>    | <b>0.94 (0.90 - 0.99)</b> | <b>0.017</b> | <b>0.93 (0.90 - 0.95)</b> | <b>7.29E-06</b> | 35                | -0.012 (-0.024, 0.001)         |  |
| 0.98 (0.96 - 1.01)    | 0.274           | 23                | 0.039 (0.066, -0.011)          | 0.90 (0.85 - 0.94)        | 2.53E-05        | 0.003               | <b>0.91 (0.86 - 0.97)</b> | <b>0.002</b>    | 0.92 (0.81 - 1.03)        | 0.136        | <b>0.90 (0.85 - 0.94)</b> | <b>0.004</b>    | 26                | -0.008 (-0.031, 0.015)         |  |
| 1.07 (0.98 - 1.16)    | 0.208           | 24                | -0.010 (0.013, 0.013)          | <b>0.91 (0.87 - 0.96)</b> | <b>3.02E-04</b> | <b>0.029</b>        | <b>0.90 (0.85 - 0.96)</b> | <b>0.001</b>    | 0.94 (0.83 - 1.06)        | 0.31         | <b>0.91 (0.87 - 0.96)</b> | <b>0.004</b>    | 23                | <b>-0.025 (0.044, -0.005)</b>  |  |
| 0.97 (0.84 - 1.12)    | 0.684           | 23                | 0.038 (0.025, 0.052)           | 0.92 (0.81 - 1.03)        | 0.142           | 0.649               | 0.92 (0.82 - 1.02)        | 0.126           | 1.04 (0.53 - 2.04)        | 0.908        | 0.92 (0.81 - 1.03)        | 0.238           | 25                | 0.017 (0.015, 0.049)           |  |
| NA                    | NA              | 10                | 0.069 (0.013, 0.153)           | 0.93 (0.88 - 0.97)        | 0.002           | 0.082               | 0.92 (0.87 - 0.97)        | 0.003           | 0.92 (0.83 - 1.02)        | 0.115        | 0.93 (0.88 - 0.97)        | 0.017           | 31                | -0.016 (-0.035, 0.004)         |  |
| 0.95 (0.88 - 1.03)    | 0.277           | 22                | -0.028 (0.059, 0.002)          | 0.96 (0.86 - 1.08)        | 0.508           | 0.837               | 0.96 (0.84 - 1.05)        | 0.596           | 1.05 (0.76 - 1.44)        | 0.762        | 0.96 (0.86 - 1.08)        | 0.544           | 23                | 0.066 (0.006, 0.034)           |  |
| 0.99 (0.95 - 1.04)    | 0.741           | 39                | 0.073 (0.033, 0.113)           | 1.34 (1.12 - 1.61)        | 0.001           | 0.065               | NA                        | NA              | NA                        | NA           | NA                        | NA              | 10                | 0.007 (0.013, 0.026)           |  |
| NA                    | NA              | 20                | -0.044 (0.085, -0.002)         | 0.85 (0.75 - 0.96)        | 0.009           | 0.233               | 0.85 (0.75 - 0.96)        | 0.001           | 0.85                      | NA           | NA                        | NA              | 21                | -0.071 (-0.104, -0.044)        |  |
| 0.92 (0.84 - 0.99)    | 0.069           | 19                | -0.022 (0.053, 0.010)          | 1.06 (0.97 - 1.16)        | 0.217           | 0.724               | 1.04 (0.93 - 1.13)        | 0.446           | 0.80 (0.50 - 1.30)        | 0.371        | 1.06 (0.97 - 1.16)        | 0.284           | 24                | 0.015 (0.010, 0.041)           |  |
| 0.95 (0.88 - 1.03)    | 0.227           | 22                | -0.028 (0.059, 0.002)          | <b>0.90 (0.84 - 0.98)</b> | <b>0.009</b>    | <b>0.233</b>        | <b>0.89 (0.82 - 0.97)</b> | <b>0.006</b>    | <b>0.83 (0.68 - 1.01)</b> | <b>0.068</b> | <b>0.90 (0.85 - 0.96)</b> | <b>0.041</b>    | 23                | <b>-0.062 (0.082, -0.043)</b>  |  |
| 0.99 (0.95 - 1.04)    | 0.645           | 26                | -0.011 (0.025, 0.002)          | 0.92 (0.78 - 1.07)        | 0.236           | 0.724               | NA                        | NA              | NA                        | NA           | NA                        | NA              | 19                | -0.016 (-0.027, -0.004)        |  |
| NA                    | NA              | 18                | 0.006 (0.012, 0.006)           | <b>1.09 (1.05 - 1.13)</b> | <b>3.80E-05</b> | <b>0.001</b>        | <b>1.09 (1.04 - 1.13)</b> | <b>1.69E-04</b> | 1.06 (0.97 - 1.15)        | 0.175        | <b>1.09 (1.05 - 1.13)</b> | <b>1.05E-04</b> | 48                | <b>0.053 (0.033, 0.072)</b>    |  |
| 1.01 (0.92 - 1.11)    | 0.848           | 23                | 0.012 (0.007, 0.031)           | 0.97 (0.93 - 1.02)        | 0.28            | 0.724               | 0.97 (0.92 - 1.03)        | 0.315           | 0.99 (0.91 - 1.09)        | 0.901        | 0.97 (0.94 - 1.01)        | 0.214           | 19                | -0.009 (-0.018, -0.001)        |  |
| 1.00 (0.94 - 1.07)    | 0.915           | 20                | -0.007 (0.023, 0.008)          | 1.00 (0.95 - 1.05)        | 0.981           | 0.989               | 0.99 (0.93 - 1.05)        | 0.748           | 1.00 (0.88 - 1.14)        | 0.975        | 1.00 (0.97 - 1.03)        | 0.969           | 22                | -0.004 (-0.011, 0.004)         |  |
| 0.98 (0.87 - 1.02)    | 0.167           | 38                | -0.018 (0.044, 0.008)          | <b>1.06 (1.03 - 1.08)</b> | <b>1.58E-06</b> | <b>3.04E-04</b>     | <b>1.05 (1.02 - 1.09)</b> | <b>0.002</b>    | <b>1.05 (1.00 - 1.10)</b> | <b>0.021</b> | <b>1.06 (1.03 - 1.08)</b> | <b>6.09E-05</b> | 39                | -0.002 (-0.007, 0.004)         |  |
| 0.99 (0.91 - 1.06)    | 0.645           | 26                | -0.011 (0.025, 0.002)          | 1.02 (0.94 - 1.10)        | 0.686           | 0.921               | NA                        | NA              | NA                        | NA           | NA                        | NA              | 18                | -0.002 (-0.005, 0.005)         |  |
| 1.02 (0.97 - 1.07)    | 0.404           | 31                | 0.005 (0.007, 0.018)           | 0.94 (0.86 - 1.03)        | 0.169           | 0.692               | 0.93 (0.85 - 1.03)        | 0.156           | 1.07 (0.42 - 2.77)        | 0.881        | NA                        | NA              | 16                | 0.033 (0.012, 0.055)           |  |
| 0.96 (0.81 - 1.13)    | 0.635           | 14                | -0.004 (0.031, 0.019)          | 1.05 (0.99 - 1.11)        | 0.126           | 0.634               | 1.04 (0.98 - 1.11)        | 0.22            | 1.04 (0.91 - 1.18)        | 0.589        | 1.05 (1.01 - 1.08)        | 0.052           | 23                | 0.000 (-0.001, 0.001)          |  |
| 1.15 (1.08 - 1.22)    | <b>2.55E-04</b> | 42                | <b>0.653 (0.023, 0.082)</b>    | 0.97 (0.87 - 1.08)        | 0.533           | 0.854               | 0.93 (0.85 - 1.04)        | 0.207           | 1.24 (0.68 - 19.73)       | 0.878        | 0.97 (0.87 - 1.08)        | 0.577           | 20                | 0.012 (0.004, 0.029)           |  |
| 1.14 (1.02 - 1.28)    | 0.068           | 28                | 0.036 (0.013, 0.059)           | <b>0.94 (0.92 - 0.97)</b> | <b>2.02E-06</b> | <b>3.71E-04</b>     | <b>0.95 (0.92 - 0.98)</b> | <b>0.001</b>    | <b>0.94 (0.90 - 0.98)</b> | <b>0.006</b> | <b>0.94 (0.92 - 0.97)</b> | <b>1.39E-04</b> | 37                | <b>-0.014 (0.026, -0.002)</b>  |  |
| 1.05 (0.97 - 1.14)    | 0.238           | 25                | 0.005 (0.011, 0.020)           | 0.97 (0.92 - 1.02)        | 0.266           | 0.724               | 0.99 (0.94 - 1.04)        | 0.596           | 0.95 (0.85 - 1.05)        | 0.308        | 0.97 (0.92 - 1.02)        | 0.29            | 38                | -0.023 (-0.036, -0.011)        |  |
| NA                    | NA              | 23                | -0.004 (0.021, 0.012)          | 0.90 (0.82 - 1.00)        | 0.047           | 0.524               | 0.91 (0.83 - 1.00)        | 0.048           | 1.03 (0.77 - 1.39)        | 0.817        | 0.90 (0.82 - 1.00)        | 0.094           | 26                | -0.017 (-0.037, 0.004)         |  |
|                       |                 |                   |                                | <b>1.13 (1.08 - 1.19)</b> | <b>0.98E-07</b> | <b>2.21E-04</b>     | <b>1.12 (1.06 - 1.20)</b> | <b>1.37E-04</b> | 1.12 (0.97 - 1.29)        | 0.112        | <b>1.13 (1.08 - 1.19)</b> | <b>0.001</b>    | 31                | <b>0.067 (0.039, 0.096)</b>    |  |
|                       |                 |                   |                                | 0.94 (0.87 - 1.02)        | 0.162           | 0.684               | 0.93 (0.84 - 1.02)        | 0.146           | 0.87 (0.46 - 1.62)        | 0.653        | NA                        | NA              | 21                | -0.047 (-0.083, -0.010)        |  |
|                       |                 |                   |                                | 0.99 (0.90 - 1.09)        | 0.894           | 0.961               | 1.02 (0.91 - 1.13)        | 0.767           | 0.98 (0.64 - 1.49)        | 0.924        | NA                        | NA              | 22                | 0.011 (0.006, 0.039)           |  |
|                       |                 |                   |                                | 0.94 (0.78 - 1.12)        | 0.476           | 0.816               | 0.92 (0.81 - 1.04)        | 0.187           | 1.02 (0.20 - 5.16)        | 0.977        | 0.94 (0.78 - 1.12)        | 0.527           | 14                | -0.025 (-0.023, 0.023)         |  |
|                       |                 |                   |                                | 0.99 (0.95 - 1.04)        | 0.838           | 0.954               | 0.98 (0.94 - 1.02)        | 0.366           | 0.99 (0.91 - 1.07)        | 0.76         | 0.99 (0.95 - 1.04)        | 0.843           | 31                | 0.004 (0.003, 0.010)           |  |
|                       |                 |                   |                                | 0.94 (0.85 - 1.05)        | 0.273           | 0.724               | NA                        | NA              | NA                        | NA           | NA                        | NA              | 21                | -0.009 (-0.027, 0.008)         |  |
|                       |                 |                   |                                | <b>1.12 (1.07 - 1.17)</b> | <b>1.20E-07</b> | <b>4.02E-05</b>     | <b>1.10 (1.05 - 1.16)</b> | <b>2.46E-04</b> | <b>1.12 (1.01 - 1.25)</b> | <b>0.035</b> | <b>1.12 (1.07 - 1.17)</b> | <b>5.95E-05</b> | 42                | <b>0.055 (0.032, 0.077)</b>    |  |
|                       |                 |                   |                                | <b>1.19 (1.11 - 1.27)</b> | <b>4.97E-07</b> | <b>1.26E-04</b>     | <b>1.16 (1.07 - 1.25)</b> | <b>2.38E-04</b> | <b>1.09 (0.87 - 1.36)</b> | <b>0.442</b> | <b>1.19 (1.11 - 1.27)</b> | <b>0.004</b>    | 28                | <b>0.074 (0.036, 0.112)</b>    |  |
|                       |                 |                   |                                | 1.07 (1.01 - 1.14)        | 0.023           | 0.364               | 1.05 (0.97 - 1.13)        | 0.255           | 1.33 (0.95 - 1.87)        | 0.094        | 1.07 (1.02 - 1.12)        | 0.03            | 25                | 0.018 (0                       |  |
