# Supplementary material
Source: PubMed Central journal article supplement (PMC9553869)
Supplement: 41416_2022_1923_MOESM3_ESM.pdf [file 41416_2022_1923_MOESM3_ESM.pdf]

53 Table. Significant associations with risk of breast cancer subtypes (not previously reported for risk of overall breast cancer), full results from five MR approaches.

| Protein  | Number of SNPs | Luminal A/B-like        |                 |                 |                         |                    |                         |                    |                         |                 |    | Luminal B-like             |                  |                         |                 |                  |                         |                  |                         |                  |                         |              |                         |                 |    |
|----------|----------------|-------------------------|-----------------|-----------------|-------------------------|--------------------|-------------------------|--------------------|-------------------------|-----------------|----|----------------------------|------------------|-------------------------|-----------------|------------------|-------------------------|------------------|-------------------------|------------------|-------------------------|--------------|-------------------------|-----------------|----|
|          |                | IWW OR (95% CI)         |                 | IWW P           |                         | IWW FDR-Adjusted P |                         | Median OR (95% CI) |                         | MR-Egger        |    | MR-ESSOR (95% CI)          |                  | MR-PRESSO P             |                 | MR-PRESSO P      |                         | MR-Locus         |                         | MR-Locus         |                         |              |                         |                 |    |
|          |                | 1.03 (1.02-1.04)        | 7.09E-08        | 2.25E-05        | 1.03 (1.01-1.04)        | 3.63E-05           | 1.01 (0.99-1.04)        | 0.242              | 1.03 (1.02-1.04)        | 1.07E-05        | 46 | 0.004 (0.002,0.007)        | 1.02 (1.00-1.04) | 0.041                   | 0.751           | 1.01 (0.98-1.04) | 0.288                   | 1.01 (0.98-1.05) | 0.48                    | 1.02 (1.00-1.03) | 0.019                   | 46           |                         |                 |    |
| AC1L2    | 7              | <b>0.95 (0.92-0.98)</b> | <b>0.001</b>    | <b>0.036</b>    | <b>0.96 (0.92-0.99)</b> | <b>0.021</b>       | <b>0.98 (0.89-1.09)</b> | <b>0.75</b>        | <b>0.95 (0.93-0.98)</b> | <b>0.009</b>    | 29 | <b>0.26 (0.099-0.19)</b>   |                  | 0.99 (0.92-1.06)        | 0.758           | 0.997            | 0.99 (0.91-1.08)        | 0.847            | 1.03 (0.81-1.31)        | 0.818            | 0.99 (0.92-1.06)        | 0.769        | 29                      |                 |    |
| ADAMTS1  | 4              | 1.01 (1.01-1.01)        | 0.002           | 0.045           | NA                      | NA                 | NA                      | NA                 | NA                      | NA              | 15 | 0.016 (0.013,0.049)        |                  | 1.00 (0.99-1.01)        | 0.406           | 0.751            | NA                      | NA               | NA                      | NA               | 1.01 (0.99-1.04)        | 0.566        | 29                      |                 |    |
| ADGRF1   | 10             | <b>0.97 (0.94-0.99)</b> | <b>0.002</b>    | <b>0.043</b>    | <b>0.97 (0.94-0.99)</b> | <b>0.021</b>       | <b>0.92 (0.82-1.05)</b> | <b>0.62</b>        | <b>0.97 (0.94-0.98)</b> | <b>0.012</b>    | 26 | <b>0.013 (0.012,0.005)</b> |                  | 1.00 (0.96-1.06)        | 0.699           | 0.997            | 1.02 (0.95-1.08)        | 0.621            | 1.05 (0.92-1.20)        | 0.476            | 1.01 (0.98-1.04)        | 0.769        | 29                      |                 |    |
| AMPY3    | 18             | 1.01 (1.00-1.02)        | 0.054           | 0.38            | 1.01 (1.00-1.03)        | 0.081              | 1.02 (0.99-1.05)        | 0.111              | 1.01 (1.00-1.02)        | 0.05            | 35 | 0.016 (0.002,0.033)        |                  | 0.99 (0.97-1.02)        | 0.713           | 0.997            | 0.99 (0.96-1.03)        | 0.775            | 1.01 (0.95-1.07)        | 0.763            | 0.99 (0.98-1.01)        | 0.53         | 35                      |                 |    |
| ASB      | 17             | 1.01 (1.00-1.02)        | 0.017           | 0.029           | 1.01 (0.99-1.03)        | 0.417              | 1.01 (0.98-1.06)        | 0.101              | 1.01 (0.99-1.02)        | 0.022           | 44 | <b>0.002 (0.001,0.002)</b> |                  | 1.00 (0.96-1.14)        | <b>4.48E-08</b> | <b>8.20E-05</b>  | <b>1.01 (0.91-1.14)</b> | <b>0.001</b>     | <b>1.01 (0.91-1.14)</b> | <b>0.001</b>     | <b>1.01 (0.91-1.14)</b> | <b>0.001</b> | <b>1.01 (0.91-1.14)</b> | <b>9.40E-06</b> | 44 |
| C12orf76 | 10             | 0.95 (0.91-0.99)        | 0.003           | 0.285           | 0.96 (0.92-1.01)        | 0.102              | 0.95 (0.79-1.14)        | 0.588              | 0.95 (0.91-0.99)        | 0.058           | 37 | 0.012 (0.028,0.04)         |                  | <b>0.83 (0.76-0.90)</b> | <b>7.74E-06</b> | <b>0.005</b>     | <b>0.83 (0.76-0.91)</b> | <b>5.49E-05</b>  | <b>1.01 (0.73-1.39)</b> | <b>0.959</b>     | <b>0.83 (0.78-0.90)</b> | <b>0.002</b> | 37                      |                 |    |
| CAMK1D   | 6              | <b>0.94 (0.91-0.98)</b> | <b>0.002</b>    | <b>0.048</b>    | <b>0.96 (0.92-1.00)</b> | <b>0.044</b>       | <b>1.05 (0.91-1.21)</b> | <b>0.509</b>       | <b>0.94 (0.91-0.98)</b> | <b>0.027</b>    | 19 | <b>0.40 (0.073,0.06)</b>   |                  | 1.00 (0.93-1.08)        | 0.924           | 0.997            | 1.03 (0.94-1.13)        | 0.543            | 1.17 (0.85-1.60)        | 0.339            | 1.00 (0.94-1.07)        | 0.433        | 21                      |                 |    |
| CASP1    | 8              | <b>1.07 (1.03-1.10)</b> | <b>2.88E-04</b> | <b>0.012</b>    | <b>1.02 (1.02-1.11)</b> | <b>0.007</b>       | <b>0.99 (0.89-1.10)</b> | <b>0.508</b>       | <b>1.07 (1.04-1.10)</b> | <b>0.001</b>    | 21 | <b>0.01 (0.040,0.018)</b>  |                  | 1.03 (0.96-1.11)        | 0.504           | 0.997            | 1.04 (0.84-1.15)        | 0.533            | 1.15 (0.91-1.46)        | 0.233            | 1.03 (0.96-1.11)        | 0.193        | 21                      |                 |    |
| CCND1    | 2              | 0.86 (0.82-0.92)        | 4.52E-05        | 0.003           | NA                      | NA                 | NA                      | NA                 | NA                      | NA              | 26 | 0.003 (0.13,0.008)         |                  | 0.78 (0.66-0.92)        | 0.002           | 0.997            | NA                      | NA               | NA                      | NA               | NA                      | NA           | 26                      |                 |    |
| CCND2    | 1              | <b>0.79 (0.71-0.87)</b> | <b>3.69E-06</b> | <b>3.93E-04</b> | NA                      | NA                 | NA                      | NA                 | NA                      | NA              | 11 | -0.131 (0.222,0.041)       |                  | 0.90 (0.72-1.13)        | 0.356           | 0.997            | NA                      | NA               | NA                      | NA               | NA                      | NA           | 11                      |                 |    |
| CD209    | 22             | 1.02 (1.00-1.05)        | 0.034           | 0.171           | 1.03 (1.01-1.05)        | 0.001              | 1.02 (0.98-1.06)        | 0.277              | 1.02 (1.00-1.05)        | 0.022           | 38 | 0.034 (0.001,0.027)        |                  | 1.02 (0.99-1.05)        | 0.131           | 0.997            | 1.02 (0.98-1.06)        | 0.381            | 1.02 (0.97-1.07)        | 0.473            | 1.02 (1.00-1.04)        | 0.03         | 38                      |                 |    |
| CD30C    | 4              | 1.01 (0.98-1.04)        | 0.456           | 0.928           | 1.01 (0.97-1.05)        | 0.626              | 0.92 (0.83-1.04)        | 0.377              | 1.01 (0.98-1.04)        | 0.482           | 35 | 0.002 (0.007,0.003)        |                  | 0.94 (0.84-1.01)        | 0.08            | 0.928            | 0.93 (0.86-1.01)        | 0.094            | 0.91 (0.72-1.16)        | 0.455            | 0.94 (0.90-0.99)        | 0.072        | 35                      |                 |    |
| CLC12A   | 21             | 1.00 (0.99-1.01)        | 0.35            | 0.822           | 1.00 (0.99-1.02)        | 0.476              | 1.00 (0.97-1.02)        | 0.684              | 1.00 (1.00-1.01)        | 0.021           | 36 | 0.000 (0.002,0.001)        |                  | 1.00 (0.98-1.03)        | 0.809           | 0.997            | 1.02 (0.99-1.06)        | 0.176            | 1.03 (0.98-1.08)        | 0.237            | 1.00 (0.98-1.03)        | 0.811        | 36                      |                 |    |
| CLIC2    | 11             | <b>0.95 (0.93-0.97)</b> | <b>5.29E-05</b> | <b>0.004</b>    | <b>0.96 (0.93-0.99)</b> | <b>0.018</b>       | <b>0.99 (0.92-1.06)</b> | <b>0.732</b>       | <b>0.95 (0.93-0.97)</b> | <b>0.031</b>    | 30 | <b>0.026 (0.042,0.009)</b> |                  | 1.00 (0.95-1.05)        | 0.911           | 0.997            | 1.03 (0.96-1.10)        | 0.475            | 1.03 (0.87-1.21)        | 0.759            | 1.00 (0.95-1.04)        | 0.898        | 30                      |                 |    |
| CST7     | 12             | <b>1.03 (1.01-1.05)</b> | <b>0.001</b>    | <b>0.04</b>     | <b>1.02 (1.00-1.04)</b> | <b>0.038</b>       | <b>1.01 (0.98-1.06)</b> | <b>0.459</b>       | <b>1.03 (0.91-1.05)</b> | <b>0.009</b>    | 44 | <b>0.011 (0.001,0.020)</b> |                  | 1.02 (0.98-1.05)        | 0.365           | 0.997            | 1.03 (0.97-1.06)        | 0.422            | 1.02 (0.94-1.10)        | 0.614            | 1.02 (1.00-1.03)        | 0.041        | 44                      |                 |    |
| CTSS     | 11             | 1.00 (0.98-1.02)        | 0.771           | 0.952           | 1.01 (0.97-1.03)        | 0.655              | 1.01 (0.97-1.05)        | 0.735              | 1.01 (0.98-1.01)        | 0.735           | 37 | -0.002 (0.006,0.002)       |                  | 0.98 (0.94-1.03)        | 0.419           | 0.997            | 0.97 (0.92-1.03)        | 0.391            | 0.97 (0.88-1.06)        | 0.472            | 0.98 (0.95-1.01)        | 0.248        | 37                      |                 |    |
| CKC11    | 6              | 1.01 (0.99-1.03)        | 0.468           | 0.935           | 1.01 (0.99-1.03)        | 0.52               | 0.99 (0.94-1.05)        | 0.729              | 1.01 (0.99-1.03)        | 0.501           | 27 | 0.004 (0.003,0.010)        |                  | <b>1.08 (1.03-1.12)</b> | <b>4.37E-04</b> | <b>0.101</b>     | <b>1.07 (1.02-1.12)</b> | <b>0.005</b>     | <b>0.99 (0.90-1.10)</b> | <b>0.906</b>     | <b>1.08 (1.04-1.11)</b> | <b>0.009</b> | 27                      |                 |    |
| DMP7     | 6              | 0.99 (0.96-1.03)        | 0.71            | 0.847           | 1.00 (0.96-1.04)        | 0.844              | 1.01 (0.90-1.14)        | 0.854              | 0.99 (0.97-1.02)        | 0.602           | 13 | 0.000 (0.001,0.001)        |                  | 1.02 (0.96-1.10)        | 0.553           | 0.997            | 1.02 (0.94-1.12)        | 0.62             | 1.12 (0.85-1.46)        | 0.43             | 1.02 (0.95-1.10)        | 0.579        | 13                      |                 |    |
| EPR4     | 3              | <b>1.02 (1.01-1.04)</b> | <b>5.51E-06</b> | <b>0.001</b>    | <b>1.02 (1.00-1.03)</b> | <b>0.009</b>       | <b>1.00 (0.98-1.03)</b> | <b>0.764</b>       | <b>1.02 (1.01-1.04)</b> | <b>8.41E-05</b> | 38 | 0.004 (0.001,0.010)        |                  | 0.99 (0.97-1.01)        | 0.348           | 0.997            | 1.00 (0.97-1.02)        | 0.87             | 1.01 (0.97-1.05)        | 0.731            | 0.99 (0.97-1.01)        | 0.303        | 38                      |                 |    |
| FBP1     | 10             | <b>1.06 (1.03-1.09)</b> | <b>2.91E-04</b> | <b>0.012</b>    | <b>1.06 (1.03-1.09)</b> | <b>0.002</b>       | <b>1.07 (0.98-1.17)</b> | <b>0.117</b>       | <b>1.06 (1.03-1.09)</b> | <b>0.006</b>    | 27 | 0.015 (0.000,0.029)        |                  | 1.04 (0.99-1.09)        | 0.135           | 0.997            | 1.02 (0.95-1.08)        | 0.626            | 0.99 (0.87-1.13)        | 0.59             | 1.04 (1.01-1.07)        | 0.043        | 27                      |                 |    |
| FAM5D    | 29             | <b>1.03 (1.01-1.05)</b> | <b>4.79E-04</b> | <b>0.016</b>    | <b>1.05 (1.03-1.07)</b> | <b>2.84E-06</b>    | <b>1.04 (1.00-1.09)</b> | <b>0.058</b>       | <b>1.03 (1.01-1.05)</b> | <b>0.002</b>    | 40 | 0.004 (0.003,0.011)        |                  | 0.96 (0.92-1.01)        | 0.09            | 0.977            | 1.03 (0.99-1.08)        | 0.133            | 1.05 (0.96-1.15)        | 0.252            | 0.96 (0.92-1.01)        | 0.101        | 40                      |                 |    |
| FGFR2A   | 28             | 1.01 (1.01-1.02)        | 0.034           | 0.259           | 1.01 (1.01-1.02)        | 0.037              | 1.01 (1.00-1.04)        | 0.025              | 1.01 (1.00-1.02)        | 0.016           | 46 | 0.000 (0.001,0.000)        |                  | 0.98 (0.96-1.01)        | 0.025           | 0.704            | 0.98 (0.96-1.01)        | 0.228            | 1.01 (0.97-1.06)        | 0.236            | 0.98 (0.96-0.99)        | 0.02         | 46                      |                 |    |
| FGF19    | 2              | 0.97 (0.91-1.04)        | 0.412           | 0.9             | NA                      | NA                 | NA                      | NA                 | NA                      | NA              | 16 | -0.047 (0.089,0.04)        |                  | 1.00 (0.98-1.02)        | 0.899           | 0.997            | 1.01 (0.98-1.04)        | 0.439            | 1.02 (0.98-1.06)        | 0.399            | 1.00 (0.98-1.02)        | 0.894        | 55                      |                 |    |
| FKBP6    | 34             | <b>0.98 (0.97-0.99)</b> | <b>4.33E-05</b> | <b>0.003</b>    | <b>0.98 (0.97-0.99)</b> | <b>0.007</b>       | <b>0.97 (0.95-1.00)</b> | <b>0.019</b>       | <b>0.98 (0.97-0.99)</b> | <b>2.69E-04</b> | 55 | -0.002 (0.007,0.002)       |                  | 1.00 (0.98-1.02)        | 0.899           | 0.997            | 1.01 (0.98-1.04)        | 0.439            | 1.02 (0.98-1.06)        | 0.399            | 1.00 (0.98-1.02)        | 0.894        | 55                      |                 |    |
| FRS3     | 17             | 1.01 (0.99-1.03)        | 0.16            | 0.52            | 1.01 (0.99-1.03)        | 0.13               | 1.01 (0.97-1.05)        | 0.12               | 1.01 (0.99-1.03)        | 0.13            | 32 | 0.002 (0.002,0.002)        |                  | 1.02 (0.98-1.06)        | 0.352           | 0.997            | 1.04 (0.99-1.09)        | 0.362            | 1.06 (0.97-1.15)        | 0.181            | 1.02 (0.98-1.06)        | 0.369        | 32                      |                 |    |
| GGP2     | 4              | <b>0.93 (0.89-0.97)</b> | <b>0.002</b>    | <b>0.043</b>    | <b>0.93 (0.88-0.97)</b> | <b>0.001</b>       | <b>1.03 (0.87-1.22)</b> | <b>0.721</b>       | <b>0.93 (0.90-0.96)</b> | <b>0.026</b>    | 22 | -0.021 (0.043,0.001)       |                  | 0.99 (0.90-1.10)        | 0.92            | 0.997            | 1.03 (0.93-1.16)        | 0.549            | 1.18 (0.81-1.73)        | 0.384            | 0.99 (0.92-1.07)        | 0.909        | 22                      |                 |    |
| GILR1D1  | 16             | 0.99 (0.97-1.00)        | 0.062           | 0.408           | 0.98 (0.96-1.00)        | 0.108              | 0.97 (0.94-1.01)        | 0.182              | 0.99 (0.97-1.01)        | 0.077           | 26 | -0.006 (0.012,0.000)       |                  | 1.01 (0.98-1.04)        | 0.489           | 0.997            | 1.01 (0.96-1.05)        | 0.775            | 0.98 (0.91-1.06)        | 0.679            | 1.01 (0.99-1.03)        | 0.297        | 26                      |                 |    |
| GNS      | 1              | <b>0.86 (0.78-0.84)</b> | <b>0.005</b>    | <b>0.045</b>    | <b>0.91 (0.86-0.96)</b> | <b>0.008</b>       | <b>1.01 (0.85-1.18)</b> | <b>0.004</b>       | <b>0.91 (0.86-0.96)</b> | <b>0.008</b>    | 15 | -0.044 (0.085,0.036)       |                  | 0.93 (0.75-1.15)        | 0.492           | 0.997            | 0.90 (0.75-1.07)        | 0.88             | 1.12 (0.81-1.55)        | 0.147            | 1.00 (0.94-1.06)        | 0.939        | 15                      |                 |    |
| GPY1     | 17             | <b>0.93 (0.90-0.96)</b> | <b>9.56E-05</b> | <b>0.006</b>    | <b>0.95 (0.90-0.99)</b> | <b>0.017</b>       | <b>1.00 (0.86-1.29)</b> | <b>0.587</b>       | <b>0.93 (0.90-0.96)</b> | <b>0.013</b>    | 23 | <b>0.024 (0.047,0.001)</b> |                  | 1.00 (0.92-1.08)        | 0.945           | 0.997            | 1.02 (0.93-1.12)        | 0.689            | 1.37 (0.88-2.14)        | 0.167            | 1.00 (0.94-1.06)        | 0.929        | 23                      |                 |    |
| GRIA4    | 2              | <b>1.27 (1.17-1.38)</b> | <b>1.66E-08</b> | <b>6.69E-06</b> | NA                      | NA                 | NA                      | NA                 | NA                      | NA              | 97 | 0.011 (0.001,0.020)        |                  | 1.06 (0.88-1.28)        | 0.537           | 0.997            | 1.06 (0.93-1.22)        | 0.621            | 1.06 (0.93-1.22)        | 0.621            | 1.00 (0.94-1.06)        | 0.929        | 97                      |                 |    |
| H2Z      | 23             | <b>1.02 (1.01-1.04)</b> | <b>1.97E-04</b> | <b>0.01</b>     | <b>1.02 (1.01-1.04)</b> | <b>0.005</b>       | <b>1.02 (0.99-1.05)</b> | <b>0.111</b>       | <b>1.02 (1.01-1.04)</b> | <b>0.001</b>    | 47 | 0.005 (0.002,0.013)        |                  | 1.00 (0.97-1.04)        | 0.804           | 0.997            | 0.99 (0.96-1.03)        | 0.785            | 1.00 (0.93-1.07)        | 0.957            | 1.00 (0.97-1.04)        | 0.806        | 47                      |                 |    |
| HBP1L    | 10             | <b>0.98 (0.92-0.98)</b> | <b>0.002</b>    | <b>0.036</b>    | <b>0.96 (0.92-0.98)</b> | <b>0.026</b>       | <b>1.01 (0.91-1.13)</b> | <b>0.004</b>       | <b>0.95 (0.92-0.98)</b> | <b>0.012</b>    | 30 | <b>0.002 (0.005,0.004)</b> |                  | 1.02 (0.95-1.12)        | 0.456           | 0.997            | 1.02 (0.94-1.11)        | 0.556            | 1.02 (0.97-1.10)        | 0.9              | 1.02 (0.96-1.11)        | 0.448        | 30                      |                 |    |
| ICAM1    | 34             | 1.00 (0.99-1.01)        | 0.841           | 0.974           | 1.00 (0.98-1.01)        | 0.851              | 0.98 (0.96-1.01)        | 0.196              | 1.00 (0.99-1.01)        | 0.843           | 63 | 0.005 (0.000,0.010)        |                  | 0.99 (0.97-1.01)        | 0.564           | 0.997            | 0.99 (0.96-1.02)        | 0.584            | 0.97 (0.93-1.01)        | 0.188            | 0.99 (0.97-1.01)        | 0.54         | 63                      |                 |    |
| ICAM5    | 18             | 0.98 (0.96-1.00)        | 0.121           | 0.501           | 1.00 (0.98-1.03)        | 0.692              | 1.03 (0.99-1.07)        | 0.177              | 0.98 (0.96-1.00)        | 0.139           | 42 | -0.012 (0.022,0.003)       |                  | 1.00 (0.99-1.03)        |                 |                  |                         |                  |                         |                  |                         |              |                         |                 |    |

| MRUCU slope alpha (95% Int) | Luminal & HER2 negative-like |          |                    |                    |          |                   |         |                       |             |                |                        | MRUCU slope alpha (95% Int) | HER2 enriched |                    |                    |          |                   |                  |                       |             |  |  |  |
|-----------------------------|------------------------------|----------|--------------------|--------------------|----------|-------------------|---------|-----------------------|-------------|----------------|------------------------|-----------------------------|---------------|--------------------|--------------------|----------|-------------------|------------------|-----------------------|-------------|--|--|--|
|                             | I/W OR (95% CI)              | I/W P    | I/W FDR Adjusted P | Median OR (95% CI) | Median P | Egger OR (95% CI) | Egger P | MR PRESSO OR (95% CI) | MR PRESSO P | MRUCU clusters | I/W OR (95% CI)        |                             | I/W P         | I/W FDR Adjusted P | Median OR (95% CI) | Median P | Egger OR (95% CI) | Egger P          | MR PRESSO OR (95% CI) | MR PRESSO P |  |  |  |
| 0.05 (0.02, 0.08)           | 1.03 (1.01-1.04)             | 2.95E-04 | 0.039              | 1.03 (1.01-1.04)   | 0.022    | 1.02 (0.99-1.05)  | 0.21    | 1.03 (1.02-1.04)      | 4.85E-06    | 46             | 0.001 (0.002, 0.003)   | 1.00 (0.96-1.03)            | 0.92          | 0.999              | 1.02 (0.98-1.06)   | 0.273    | 1.05 (0.98-1.12)  | 0.196            | 1.00 (0.96-1.03)      | 0.921       |  |  |  |
| 0.002 (0.004, 0.009)        | 0.94 (0.89-1.01)             | 0.074    | 0.442              | 0.94 (0.88-1.01)   | 0.115    | 1.00 (0.80-1.25)  | 0.992   | 0.94 (0.89-1.01)      | 0.124       | 29             | -0.034 (0.065, 0.003)  | 1.01 (0.92-1.11)            | 0.856         | 0.999              | 0.99 (0.88-1.12)   | 0.933    | 0.97 (0.70-1.33)  | 0.841            | 1.01 (0.91-1.09)      | 0.833       |  |  |  |
| 0.004 (0.005, 0.004)        | 1.25 (0.96-1.71)             | 0.046    | 0.406              | 1.25 (0.96-1.71)   | 0.046    | NA                | NA      | NA                    | NA          | 14             | -0.177 (0.346, 0.012)  | 1.01 (0.92-1.11)            | 0.856         | 0.999              | 1.06 (0.96-1.17)   | 0.223    | 0.999             | 1.06 (0.96-1.17) | 0.223                 |             |  |  |  |
| -0.019 (0.031, -0.007)      | 0.95 (0.91-0.99)             | 0.016    | 0.328              | 0.95 (0.91-0.99)   | 0.154    | 0.96 (0.86-1.08)  | 0.505   | 0.95 (0.92-0.99)      | 0.025       | 26             | -0.002 (0.007, 0.004)  | 0.90 (0.91-1.05)            | 0.599         | 0.999              | 0.90 (0.91-1.09)   | 0.848    | 0.98 (0.79-1.22)  | 0.848            | 0.98 (0.91-1.05)      | 0.611       |  |  |  |
| 0.006 (0.009, 0.021)        | 1.04 (1.02-1.07)             | 4.94E-05 | 0.014              | 1.04 (1.01-1.07)   | 0.018    | 1.06 (1.01-1.12)  | 0.016   | 1.04 (1.02-1.06)      | 2.23E-04    | 35             | -0.017 (0.042, 0.009)  | 1.02 (0.99-1.06)            | 0.971         | 0.999              | 1.02 (0.97-1.07)   | 0.484    | 1.03 (0.94-1.12)  | 0.524            | 1.02 (1.00-1.05)      | 0.089       |  |  |  |
| -0.012 (0.005, 0.014)       | 1.05 (1.02-1.09)             | 0.003    | 0.029              | 1.05 (1.02-1.09)   | 0.029    | 1.05 (0.99-1.13)  | 0.149   | 1.05 (0.99-1.13)      | 0.005       | 48             | -0.037 (0.002, 0.016)  | 1.04 (0.99-1.09)            | 0.622         | 0.999              | 1.06 (0.95-1.14)   | 0.075    | 1.12 (1.00-1.24)  | 0.024            | 1.08 (1.01-1.14)      | 0.069       |  |  |  |
| -0.023 (-0.058, 0.012)      | 0.95 (0.90-1.00)             | 0.056    | 0.413              | 0.96 (0.88-1.04)   | 0.289    | 0.94 (0.75-1.18)  | 0.597   | 0.95 (0.90-1.00)      | 0.078       | 37             | -0.008 (0.042, 0.009)  | 1.00 (0.97-1.15)            | 0.976         | 0.999              | 1.00 (0.96-1.27)   | 0.161    | 1.05 (0.87-1.27)  | 0.582            | 1.00 (0.97-1.15)      | 0.977       |  |  |  |
| 0.065 (0.02, 0.128)         | 0.91 (0.85-0.97)             | 0.004    | 0.168              | 0.91 (0.85-0.97)   | 0.031    | 0.97 (0.74-1.27)  | 0.823   | 0.91 (0.87-0.95)      | 0.007       | 19             | -0.017 (0.036, 0.02)   | 0.99 (0.89-1.11)            | 0.99          | 0.999              | 1.01 (0.88-1.15)   | 0.924    | 1.03 (0.65-1.62)  | 0.914            | 0.99 (0.94-1.05)      | 0.815       |  |  |  |
| -0.006 (0.025, 0.014)       | 1.04 (0.98-1.11)             | 0.197    | 0.628              | 1.06 (0.97-1.15)   | 0.182    | 1.12 (0.91-1.37)  | 0.281   | 1.04 (0.99-1.10)      | 0.157       | 26             | -0.009 (0.088-1.10)    | 0.90 (0.88-1.10)            | 0.959         | 0.999              | 0.95 (0.82-1.10)   | 0.745    | 1.09 (0.78-1.52)  | 0.626            | 0.99 (0.89-1.09)      | 0.79        |  |  |  |
| -0.016 (0.046, 0.014)       | 0.94 (0.82-1.08)             | 0.409    | 0.672              | 0.94 (0.82-1.08)   | 0.409    | 0.672             | 0.409   | 0.94 (0.82-1.08)      | 0.409       | 26             | 0.027 (0.111, 0.062)   | 0.82 (0.46-1.48)            | 0.52          | 0.999              | 0.82 (0.46-1.48)   | 0.52     | 0.999             | 0.82 (0.46-1.48) | 0.52                  |             |  |  |  |
| -0.012 (0.040, 0.017)       | 0.82 (0.68-1.00)             | 0.048    | 0.406              | 0.82 (0.68-1.00)   | 0.048    | NA                | NA      | NA                    | NA          | 11             | -0.105 (0.142, 0.020)  | 0.87 (0.62-1.20)            | 0.39          | 0.999              | 0.87 (0.62-1.20)   | 0.39     | 0.999             | 0.87 (0.62-1.20) | 0.39                  |             |  |  |  |
| 0.001 (0.002, 0.005)        | 1.04 (1.01-1.06)             | 0.001    | 0.107              | 1.05 (1.01-1.08)   | 0.006    | 1.05 (0.91-1.10)  | 0.024   | 1.04 (1.02-1.05)      | 3.73E-05    | 38             | -0.004 (0.004, 0.002)  | 1.02 (0.97-1.07)            | 0.447         | 0.999              | 1.01 (0.96-1.07)   | 0.615    | 1.08 (0.98-1.18)  | 0.106            | 1.02 (0.97-1.07)      | 0.455       |  |  |  |
| -0.003 (0.010, 0.004)       | 1.02 (0.96-1.08)             | 0.457    | 0.701              | 1.02 (0.96-1.08)   | 0.457    | 0.701             | 0.457   | 1.02 (0.96-1.08)      | 0.457       | 35             | -0.037 (0.004, 0.013)  | 1.06 (0.96-1.17)            | 0.223         | 0.999              | 1.06 (0.96-1.17)   | 0.223    | 0.999             | 1.06 (0.96-1.17) | 0.223                 |             |  |  |  |
| 0.000 (1.000, 0.000)        | 1.04 (1.01-1.06)             | 3.63E-04 | 0.043              | 1.04 (1.01-1.06)   | 0.006    | 1.02 (0.98-1.07)  | 0.283   | 1.04 (1.02-1.06)      | 0.002       | 36             | 0.005 (0.004, 0.013)   | 1.00 (0.96-1.03)            | 0.8           | 0.999              | 0.99 (0.95-1.03)   | 0.548    | 1.00 (0.93-1.07)  | 0.98             | 1.00 (0.97-1.02)      | 0.727       |  |  |  |
| 0.005 (0.007, 0.016)        | 0.95 (0.90-1.00)             | 0.038    | 0.406              | 0.95 (0.89-1.01)   | 0.101    | 0.96 (0.82-1.12)  | 0.587   | 0.95 (0.90-1.00)      | 0.064       | 30             | -0.027 (0.043, 0.012)  | 1.00 (0.92-1.08)            | 0.966         | 0.999              | 1.00 (0.91-1.11)   | 0.939    | 0.94 (0.74-1.19)  | 0.6              | 1.00 (0.94-1.06)      | 0.96        |  |  |  |
| -0.008 (0.000, 0.022)       | 1.01 (0.98-1.05)             | 0.348    | 0.65               | 1.03 (0.99-1.07)   | 0.191    | 1.05 (0.98-1.12)  | 0.186   | 1.01 (0.99-1.04)      | 0.34        | 44             | 0.002 (0.007, 0.003)   | 1.00 (0.94-1.06)            | 0.97          | 0.999              | 1.03 (0.97-1.10)   | 0.335    | 1.17 (1.04-1.31)  | 0.008            | 1.00 (0.94-1.06)      | 0.97        |  |  |  |
| 0.007 (0.004, 0.018)        | 0.94 (0.91-0.98)             | 0.005    | 0.18               | 0.95 (0.90-1.00)   | 0.047    | 0.95 (0.88-1.02)  | 0.175   | 0.94 (0.91-0.98)      | 0.012       | 37             | -0.013 (0.027, 0.001)  | 0.92 (0.85-1.00)            | 0.444         | 0.779              | 0.93 (0.85-1.03)   | 0.155    | 0.97 (0.83-1.14)  | 0.734            | 0.92 (0.85-1.00)      | 0.071       |  |  |  |
| 0.007 (0.003, 0.016)        | 1.01 (0.98-1.05)             | 0.545    | 0.757              | 1.01 (0.98-1.05)   | 0.562    | 0.99 (1.00-1.09)  | 0.884   | 1.01 (0.98-1.05)      | 0.562       | 27             | 0.005 (0.010, 0.020)   | 1.03 (0.97-1.09)            | 0.318         | 0.999              | 1.03 (0.96-1.10)   | 0.346    | 1.02 (0.88-1.17)  | 0.828            | 1.03 (1.01-1.06)      | 0.058       |  |  |  |
| -0.014 (-0.050, 0.022)      | 0.88 (0.83-0.94)             | 1.83E-04 | 0.62               | 0.89 (0.83-0.94)   | 0.004    | 0.94 (0.76-1.17)  | 0.582   | 0.88 (0.86-0.93)      | 0.001       | 13             | -0.006 (0.015, 0.007)  | 1.00 (0.89-1.12)            | 0.971         | 0.999              | 1.03 (0.96-1.18)   | 0.647    | 1.17 (0.77-1.78)  | 0.453            | 1.00 (0.89-1.12)      | 0.972       |  |  |  |
| 0.001 (0.002, 0.001)        | 0.99 (0.97-1.00)             | 0.063    | 0.426              | 0.99 (0.97-1.00)   | 0.578    | 0.99 (0.96-1.02)  | 0.475   | 0.98 (0.97-1.00)      | 0.049       | 38             | -0.001 (0.003, 0.001)  | 1.02 (0.99-1.05)            | 0.137         | 0.999              | 1.00 (0.96-1.04)   | 0.843    | 1.00 (0.96-1.04)  | 0.206            | 1.02 (0.99-1.05)      | 0.12        |  |  |  |
| -0.001 (-0.002, 0.001)      | 1.07 (1.03-1.12)             | 0.001    | 0.107              | 1.07 (1.03-1.12)   | 0.022    | 1.07 (1.05-1.09)  | 0.222   | 1.07 (1.05-1.09)      | 1.29E-04    | 27             | 0.008 (0.004, 0.014)   | 1.04 (0.99-1.12)            | 0.212         | 0.999              | 1.04 (0.95-1.14)   | 0.352    | 1.00 (0.80-1.25)  | 0.94             | 1.06 (0.97-1.14)      | 0.214       |  |  |  |
| -0.002 (-0.009, 0.004)      | 1.03 (1.00-1.05)             | 0.021    | 0.355              | 1.03 (1.00-1.05)   | 0.03     | 1.03 (0.98-1.08)  | 0.222   | 1.03 (1.01-1.04)      | 0.007       | 40             | 0.001 (0.003, 0.005)   | 0.99 (0.96-1.03)            | 0.815         | 0.999              | 1.00 (0.95-1.05)   | 0.996    | 1.02 (0.94-1.11)  | 0.632            | 0.99 (0.96-1.03)      | 0.814       |  |  |  |
| 0.001 (0.001, 0.001)        | 0.99 (0.97-1.01)             | 0.234    | 0.65               | 0.99 (0.97-1.01)   | 0.515    | 0.99 (0.96-1.03)  | 0.612   | 0.99 (0.97-1.01)      | 0.243       | 46             | 0.000 (0.001, 0.001)   | 1.02 (0.98-1.05)            | 0.134         | 0.999              | 1.03 (0.99-1.07)   | 0.189    | 1.01 (0.95-1.07)  | 0.778            | 1.02 (1.00-1.05)      | 0.106       |  |  |  |
| -0.118 (0.210, 0.626)       | 0.92 (0.80-1.05)             | 0.213    | 0.64               | 0.92 (0.80-1.05)   | 0.213    | 0.64              | 0.213   | 0.92 (0.80-1.05)      | 0.213       | 16             | -0.027 (0.066, 0.012)  | 0.96 (0.77-1.21)            | 0.757         | 0.999              | 0.96 (0.77-1.21)   | 0.757    | 0.999             | 0.96 (0.77-1.21) | 0.757                 |             |  |  |  |
| -0.002 (-0.006, 0.02)       | 0.98 (0.96-1.00)             | 0.023    | 0.36               | 0.97 (0.95-1.00)   | 0.04     | 0.96 (0.92-1.00)  | 0.049   | 0.98 (0.96-1.00)      | 0.03        | 55             | -0.010 (0.024, 0.004)  | 1.02 (0.99-1.05)            | 0.224         | 0.999              | 1.01 (0.97-1.06)   | 0.638    | 0.98 (0.93-1.05)  | 0.629            | 1.02 (0.99-1.05)      | 0.199       |  |  |  |
| 0.002 (0.002, 0.007)        | 1.02 (0.98-1.03)             | 0.763    | 0.899              | 1.02 (0.98-1.03)   | 0.763    | 0.899             | 0.763   | 1.02 (0.98-1.03)      | 0.763       | 22             | 0.006 (0.017, 0.005)   | 1.01 (0.97-1.05)            | 0.157         | 0.999              | 1.01 (0.97-1.05)   | 0.157    | 0.999             | 1.01 (0.97-1.05) | 0.157                 |             |  |  |  |
| 0.008 (0.005, 0.02)         | 0.93 (0.84-1.02)             | 0.1      | 0.509              | 0.93 (0.84-1.02)   | 0.126    | 0.93 (0.61-1.42)  | 0.738   | 0.93 (0.85-1.01)      | 0.199       | 22             | 0.002 (0.023, 0.009)   | 1.06 (0.92-1.22)            | 0.415         | 0.999              | 1.02 (0.86-1.20)   | 0.84     | 0.99 (0.49-1.49)  | 0.589            | 1.06 (0.93-1.21)      | 0.434       |  |  |  |
| 0.001 (0.02, 0.005)         | 0.95 (0.92-0.97)             | 1.03E-04 | 0.02               | 0.96 (0.92-0.99)   | 0.028    | 0.97 (0.91-1.04)  | 0.351   | 0.95 (0.93-0.97)      | 1.51E-04    | 26             | -0.008 (0.023, 0.006)  | 0.98 (0.94-1.03)            | 0.417         | 0.999              | 1.00 (0.94-1.07)   | 0.992    | 1.01 (0.80-1.13)  | 0.847            | 0.98 (0.94-1.02)      | 0.35        |  |  |  |
| -0.006 (-0.123, 0.003)      | 0.78 (0.65-0.94)             | 0.009    | 0.213              | 0.78 (0.65-0.94)   | 0.009    | 0.213             | 0.009   | 0.78 (0.65-0.94)      | 0.009       | 18             | -0.067 (0.125-0.011)   | 0.67 (0.66-1.23)            | 0.54          | 0.999              | 0.67 (0.66-1.23)   | 0.54     | 0.999             | 0.67 (0.66-1.23) | 0.54                  |             |  |  |  |
| -0.011 (0.031, 0.009)       | 1.00 (0.84-0.96)             | 0.001    | 0.107              | 0.90 (0.81-0.98)   | 0.021    | 0.85 (0.58-1.24)  | 0.391   | 0.90 (0.84-0.95)      | 0.021       | 23             | 0.007 (0.008, 0.040)   | 0.97 (0.86-1.09)            | 0.626         | 0.999              | 1.01 (0.88-1.16)   | 0.865    | 0.92 (0.45-1.85)  | 0.806            | 0.97 (0.87-1.08)      | 0.631       |  |  |  |
| 0.001 (0.003, 0.005)        | 1.21 (1.03-1.41)             | 0.017    | 0.328              | 1.21 (1.03-1.41)   | 0.017    | 0.328             | 0.017   | 1.21 (1.03-1.41)      | 0.017       | 38             | -0.001 (0.004, 0.003)  | 1.34 (1.02-1.77)            | 0.037         | 0.742              | 1.34 (1.02-1.77)   | 0.037    | 0.742             | 1.34 (1.02-1.77) | 0.037                 |             |  |  |  |
| 0.004 (0.000, 0.007)        | 1.04 (1.01-1.06)             | 0.002    | 0.107              | 1.04 (1.01-1.06)   | 0.027    | 1.03 (0.99-1.08)  | 0.176   | 1.04 (1.01-1.06)      | 0.003       | 47             | 0.004 (0.004, 0.012)   | 0.95 (0.92-0.99)            | 0.024         | 0.617              | 0.97 (0.91-1.03)   | 0.277    | 1.03 (0.95-1.11)  | 0.475            | 0.95 (0.92-0.99)      | 0.034       |  |  |  |
| -0.004 (0.000, 0.007)       | 0.99 (0.90-1.11)             | 0.025    | 0.328              | 0.99 (0.90-1.11)   | 0.025    | 0.328             | 0.025   | 0.99 (0.90-1.11)      | 0.025       | 39             | -0.001 (0.003, 0.005)  | 1.01 (0.97-1.05)            | 0.132         | 0.999              | 1.01 (0.97-1.05)   | 0.132    | 0.999             | 1.01 (0.97-1.05) | 0.132                 |             |  |  |  |
| 0.001 (0.001, 0.003)        | 1.06 (1.03-1.08)             | 1.20E-07 | 2.43E-04           | 1.05 (1.02-1.08)   | 3.79E-04 | 1.04 (1.00-1.08)  | 0.077   | 1.06 (1.03-1.08)      | 7.77E-06    | 63             | -0.005 (0.010, 0.010)  | 1.03 (0.99-1.07)            | 0.116         | 0.999              | 1.05 (1.00-1.10)   | 0.448    | 1.07 (1.00-1.16)  | 0.057            | 1.03 (0.99-1.07)      | 0.126       |  |  |  |
| 0.001 (0.001, 0.003)        | 0.94 (0.91-0.97)             | 2.68E-04 | 0.039              | 0.95 (0.92-0.99)   | 0.013    | 0.96 (0.92-1.04)  | 0.562   | 0.94 (0.91-0.97)      | 0.002       | 42             | 0.008 (0.014, 0.002)   | 0.96 (0.91-1.01)            | 0.105         | 0.999              | 0.94 (0.88-0.99)   | 0.028    | 0.90 (0.81-0.99)  | 0.028            | 0.96 (0.91-1.01)      | 0.123       |  |  |  |
| -0.002 (0.003, 0.007)       | 1.00 (0.95-1.05)             | 0.095    | 0.413              | 1.00 (0.95-1.05)   | 0.095    | 0.413             | 0.095   | 1.00 (0.95-1.05)      | 0.095       | 29             | -0.002 (0.003, 0.005)  | 1.00 (0.95-1.05)            | 0.095         | 0.999              | 1.00 (0.95-1.05)   | 0.095    | 1.00 (0.95-1.05)  | 0.095            | 1.00 (0.95-1.05)      | 0.095       |  |  |  |
| -0.005 (-0.020, 0.010)      | 1.03 (0.98-1.08)             | 0.163    | 0.591              | 1.03 (0.98-1.08)   | 0.163    | 0.591             | 0.163   | 1.03 (0.98-1.08)      | 0.163       | 29             | 0.017 (0.007, 0.04)    | 0.98 (0.92-1.05)            | 0.586         | 0.999              | 0.97 (0.90-1.06)   | 0.552    | 0.97 (0.79-1.19)  | 0.762            | 0.98 (0.92-1.05)      | 0.6         |  |  |  |
| 0.033 (0.028, 0.038)        | 0.93 (0.89-0.97)             | 1.21E-05 | 0.008              | 0.96 (0.93-0.98)   | 0.001    | 0.97 (0.94-1.01)  | 0.178   | 0.95 (0.94-0.97)      | 3.64E-04    | 24             | -0.027 (0.032, -0.022) | 1.00 (0.97-1.04)            | 0.787         | 0.999              | 1.00 (0.96-1.04)   | 0.959    | 0.98 (0.92-1.04)  | 0.487            | 1.00 (0.97-1.04)      | 0.754       |  |  |  |
| -0.001 (-0.003, 0.002)      | 1.00 (0.98-1.02)             | 0.734    | 0.406              | 1.00 (0.98-1.02)   | 0.734    | 0.406             | 0.734   | 1.00 (0.98-1.02)      | 0.734       | 17             | -0.001 (0.001, 0.002)  | 0.98 (0.95-1.01)            | 0.606         | 0.999              | 0.97 (0.92-1.02)   | 0.618    | 0.98 (0.86-0.99)  | 0.024            | 0.98 (0.95-1.02)      | 0.417       |  |  |  |
| -0.002 (0.003, 0.007)       | 1.01 (0.97-1.05)             | 0.657    | 0.837              | 1.01 (0.97-1.05)   | 0.714    | 1.03 (0.96-1.10)  | 0.842   | 1.01 (0.98-1.03)      | 0.547       | 33             | 0.001 (0.002, 0.004)   | 0.97 (0.86-1.09)            | 0.626         | 0.999              | 1.01 (0.84-1.08)   | 0.802    | 1.00 (0.86-1.12)  | 0.974            | 1.03 (1.00-1.06)      | 0.1         |  |  |  |
| -0.027 (-0.083, 0.031)      | 0.86 (0.70-1.05)             | 0.133</  |                    |                    |          |                   |         |                       |             |                |                        |                             |               |                    |                    |          |                   |                  |                       |             |  |  |  |

|                  |                               | Triple negative         |                 |                    |                         |                 |                         |                 |                         |                 |                  |                               |
|------------------|-------------------------------|-------------------------|-----------------|--------------------|-------------------------|-----------------|-------------------------|-----------------|-------------------------|-----------------|------------------|-------------------------------|
| MRLOCUS clusters | MRLOCUS slope alpha (95% Int) | IWW OR (95% CI)         | IWW P           | IWW FDR-Adjusted P | Median OR (95% CI)      | Median P        | Egger OR (95% CI)       | Egger P         | MR PRESSO OR (95% CI)   | MR PRESSO P     | MRLOCUS clusters | MRLOCUS slope alpha (95% Int) |
|                  | <b>0.034 (+0.008, 0.059)</b>  |                         |                 | <b>4.18E-04</b>    | <b>1.03 (1.01-1.05)</b> | <b>0.01</b>     | <b>1.03 (0.99-1.06)</b> | <b>0.098</b>    | <b>1.04 (1.02-1.06)</b> |                 | <b>6.65E-05</b>  | <b>0.003 (+0.003, 0.008)</b>  |
| 46               | -0.010 (+0.025, 0.006)        | 0.97 (0.91-1.04)        | 0.41            | 0.764              | 1.00 (0.93-1.07)        | 0.969           | 1.03 (0.80-1.31)        | 0.84            | 0.97 (0.91-1.04)        | 0.442           | 29               | -0.047 (+0.098, 0.006)        |
| 29               | 0.002 (+0.006, 0.011)         | 1.12 (0.85-1.40)        | 0.338           | 0.736              | NA                      | NA              | NA                      | NA              | NA                      | NA              | 14               | -0.012 (+0.020, 0.006)        |
| 14               | -0.009 (-0.028, 0.010)        | 1.00 (0.95-1.04)        | 0.834           | 0.952              | 1.00 (0.95-1.05)        | 0.975           | 1.01 (0.90-1.14)        | 0.84            | 1.00 (0.97-1.03)        | 0.778           | 26               | 0.015 (+0.009, 0.038)         |
| 26               | 0.004 (+0.005, 0.013)         | 0.97 (0.95-0.99)        | 0.016           | 0.331              | 0.99 (0.96-1.02)        | 0.387           | 1.01 (0.96-1.06)        | 0.641           | 0.97 (0.96-0.99)        | 0.004           | 35               | 0.009 (+0.003, 0.021)         |
| 35               | 0.002 (+0.004, 0.007)         | <b>1.11 (1.08-1.14)</b> | <b>2.18E-13</b> | <b>4.81E-10</b>    | <b>1.11 (1.06-1.16)</b> | <b>2.18E-13</b> | <b>1.11 (1.08-1.14)</b> | <b>2.18E-09</b> | <b>1.11 (1.08-1.14)</b> | <b>2.18E-09</b> | 48               | 0.005 (+0.003, 0.013)         |
| 48               | 0.004 (+0.005, 0.014)         | 1.01 (0.96-1.07)        | 0.598           | 0.901              | 1.00 (0.93-1.07)        | 0.931           | 0.85 (0.68-1.07)        | 0.164           | 1.01 (0.97-1.06)        | 0.508           | 37               | 0.008 (+0.009, 0.026)         |
| 37               | 0.011 (+0.025, 0.047)         | 1.00 (0.94-1.07)        | 0.959           | 0.988              | 1.01 (0.93-1.09)        | 0.815           | 1.07 (0.82-1.41)        | 0.602           | 1.00 (0.97-1.03)        | 0.918           | 19               | -0.029 (+0.075, 0.017)        |
| 19               | 0.007 (+0.016, 0.028)         | 1.03 (0.90-1.10)        | 0.408           | 0.762              | 1.04 (0.95-1.13)        | 0.37            | 0.95 (0.77-1.16)        | 0.592           | 1.03 (0.97-1.09)        | 0.368           | 21               | -0.009 (+0.026, 0.008)        |
| 21               | 0.046 (+0.100, 0.077)         | 0.97 (0.85-1.12)        | 0.69            | 0.921              | NA                      | NA              | NA                      | NA              | NA                      | NA              | 26               | 0.024 (+0.001, 0.048)         |
| 26               | -0.043 (-0.094, 0.009)        | 0.77 (0.64-0.94)        | 0.009           | 0.233              | NA                      | NA              | NA                      | NA              | NA                      | NA              | 11               | -0.145 (+0.228, 0.061)        |
| 11               | 0.065 (0.020, 0.111)          | 1.03 (0.99-1.06)        | 0.112           | 0.621              | 1.04 (1.00-1.07)        | 0.04            | 1.03 (0.97-1.10)        | 0.294           | 1.03 (0.99-1.06)        | 0.127           | 38               | -0.012 (+0.024, 0.000)        |
| 38               | -0.003 (+0.016, 0.009)        | <b>0.90 (0.85-0.96)</b> | <b>0.003</b>    | <b>0.045</b>       | <b>0.90 (0.86-0.99)</b> | <b>0.032</b>    | <b>1.02 (0.83-1.27)</b> | <b>0.836</b>    | <b>0.90 (0.87-0.94)</b> | <b>0.003</b>    | 35               | 0.003 (+0.008, 0.000)         |
| 35               | -0.001 (-0.003, 0.001)        | 1.02 (1.00-1.04)        | 0.02            | 0.356              | 1.02 (1.00-1.05)        | 0.066           | 1.03 (0.99-1.08)        | 0.108           | 1.02 (1.00-1.04)        | 0.031           | 36               | 0.002 (+0.003, 0.007)         |
| 36               | 0.025 (+0.018, 0.067)         | 0.97 (0.93-1.02)        | 0.326           | 0.796              | 1.00 (0.94-1.06)        | 0.968           | 0.95 (0.81-1.12)        | 0.54            | 0.97 (0.93-1.02)        | 0.35            | 30               | -0.005 (+0.021, 0.012)        |
| 30               | -0.001 (+0.003, 0.002)        | 1.03 (1.00-1.06)        | 0.081           | 0.586              | 1.01 (0.97-1.06)        | 0.508           | 1.01 (0.95-1.09)        | 0.673           | 1.01 (1.00-1.06)        | 0.084           | 44               | 0.002 (+0.008, 0.007)         |
| 44               | -0.004 (-0.017, 0.009)        | <b>0.93 (0.89-0.96)</b> | <b>1.60E-04</b> | <b>0.016</b>       | <b>0.94 (0.89-0.99)</b> | <b>0.023</b>    | <b>0.94 (0.87-1.02)</b> | <b>0.14</b>     | <b>0.93 (0.90-0.95)</b> | <b>3.44E-04</b> | 37               | 0.009 (+0.002, 0.020)         |
| 37               | 0.006 (+0.007, 0.018)         | 1.05 (1.01-1.09)        | 0.009           | 0.233              | 1.05 (1.01-1.10)        | 0.012           | 1.06 (0.98-1.16)        | 0.16            | 1.05 (1.03-1.06)        | 0.001           | 27               | 0.012 (+0.005, 0.028)         |
| 27               | 0.005 (+0.003, 0.007)         | 1.02 (0.95-1.08)        | 0.6             | 0.901              | 1.00 (0.93-1.09)        | 0.898           | 0.92 (0.74-1.15)        | 0.47            | 1.02 (0.97-1.07)        | 0.54            | 13               | -0.001 (+0.002, 0.000)        |
| 13               | 0.004 (+0.003, 0.012)         | 1.00 (0.98-1.02)        | 0.834           | 0.952              | 1.01 (0.99-1.03)        | 0.41            | 1.02 (0.99-1.05)        | 0.268           | 1.00 (0.99-1.01)        | 0.781           | 38               | 0.000 (+0.003, 0.002)         |
| 38               | 0.005 (+0.006, 0.016)         | 1.08 (1.03-1.13)        | 0.001           | 0.056              | 1.07 (1.01-1.13)        | 0.014           | 1.10 (0.97-1.25)        | 0.121           | 1.08 (1.03-1.13)        | 0.009           | 27               | 0.011 (+0.003, 0.024)         |
| 27               | 0.048 (+0.010, 0.087)         | <b>1.06 (1.04-1.08)</b> | <b>3.93E-07</b> | <b>1.02E-04</b>    | <b>1.06 (1.03-1.10)</b> | <b>1.87E-04</b> | <b>1.07 (1.02-1.12)</b> | <b>0.009</b>    | <b>1.06 (1.04-1.08)</b> | <b>3.01E-06</b> | 40               | 0.001 (+0.002, 0.005)         |
| 40               | 0.000 (+0.001, 0.001)         | <b>1.03 (1.01-1.05)</b> | <b>0.001</b>    | <b>0.045</b>       | <b>1.03 (1.01-1.06)</b> | <b>0.009</b>    | <b>1.01 (0.97-1.04)</b> | <b>0.657</b>    | <b>1.03 (1.02-1.04)</b> | <b>1.72E-04</b> | 46               | 0.001 (+0.001, 0.002)         |
| 46               | 0.003 (+0.007, 0.013)         | 1.12 (0.98-1.28)        | 0.088           | 0.589              | NA                      | NA              | NA                      | NA              | NA                      | NA              | 16               | -0.001 (+0.004, 0.002)        |
| 16               | -0.008 (-0.018, 0.001)        | 1.00 (0.97-1.02)        | 0.746           | 0.939              | 1.01 (0.98-1.04)        | 0.634           | 1.01 (0.97-1.06)        | 0.579           | 1.00 (0.97-1.02)        | 0.748           | 55               | -0.005 (+0.018, 0.008)        |
| 55               | 0.008 (+0.001, 0.018)         | 0.99 (0.96-1.02)        | 0.442           | 0.79               | 0.99 (0.96-1.02)        | 0.442           | 0.99 (0.96-1.02)        | 0.442           | 0.99 (0.96-1.02)        | 0.450           | 21               | -0.002 (+0.009, 0.001)        |
| 21               | -0.004 (-0.017, 0.009)        | 1.00 (0.92-1.08)        | 0.919           | 0.972              | 1.01 (0.92-1.11)        | 0.839           | 1.04 (0.75-1.45)        | 0.796           | 1.00 (0.95-1.05)        | 0.877           | 22               | -0.047 (+0.080, 0.013)        |
| 22               | 0.000 (+0.001, 0.019)         | 1.03 (1.00-1.06)        | 0.059           | 0.551              | 1.01 (0.97-1.05)        | 0.585           | 0.99 (0.92-1.06)        | 0.755           | 1.03 (1.00-1.06)        | 0.078           | 26               | -0.001 (+0.006, 0.003)        |
| 26               | 0.000 (+0.015, 0.018)         | 0.83 (0.69-1.00)        | 0.057           | 0.551              | NA                      | NA              | NA                      | NA              | NA                      | NA              | 15               | -0.017 (+0.002, 0.030)        |
| 15               | -0.001 (-0.006, 0.004)        | 0.98 (0.88-1.11)        | 0.806           | 0.939              | 1.02 (0.94-1.11)        | 0.668           | 0.90 (0.42-1.90)        | 0.779           | 0.98 (0.88-1.11)        | 0.818           | 23               | -0.013 (+0.052, 0.026)        |
| 23               | -0.007 (-0.024, 0.010)        | 0.99 (0.85-1.17)        | 0.948           | 0.983              | NA                      | NA              | NA                      | NA              | NA                      | NA              | 97               | -0.005 (+0.014, 0.005)        |
| 97               | -0.001 (+0.005, 0.002)        | 1.02 (1.00-1.05)        | 0.052           | 0.547              | 1.01 (0.98-1.04)        | 0.637           | 1.00 (0.95-1.05)        | 0.97            | 1.02 (1.00-1.04)        | 0.017           | 47               | 0.006 (+0.002, 0.013)         |
| 47               | 0.023 (+0.035, 0.010)         | 0.97 (0.90-1.06)        | 0.549           | 0.864              | 1.00 (0.94-1.07)        | 0.958           | 0.96 (0.71-1.36)        | 0.817           | 0.97 (0.90-1.06)        | 0.575           | 17               | -0.105 (+0.154, 0.035)        |
| 17               | 0.015 (+0.004, 0.034)         | 0.97 (0.95-0.99)        | 0.001           | 0.065              | 0.98 (0.95-1.00)        | 0.084           | 0.97 (0.94-1.00)        | 0.096           | 0.97 (0.96-0.99)        | 0.001           | 63               | -0.002 (+0.006, 0.002)        |
| 63               | -0.061 (+0.098, 0.023)        | 0.99 (0.97-1.02)        | 0.654           | 0.913              | 1.00 (0.97-1.04)        | 0.775           | 1.03 (0.98-1.09)        | 0.253           | 0.99 (0.97-1.02)        | 0.659           | 42               | -0.005 (+0.015, 0.005)        |
| 42               | 0.004 (+0.005, 0.012)         | 0.97 (0.95-1.00)        | 0.054           | 0.551              | 0.98 (0.94-1.02)        | 0.654           | 0.98 (0.92-1.05)        | 0.556           | 0.97 (0.95-1.00)        | 0.062           | 38               | 0.001 (+0.003, 0.002)         |
| 38               | 0.006 (+0.007, 0.020)         | 1.01 (0.97-1.05)        | 0.532           | 0.854              | 1.00 (0.96-1.05)        | 0.864           | 0.97 (0.86-1.08)        | 0.556           | 1.01 (0.99-1.04)        | 0.381           | 29               | 0.003 (+0.004, 0.010)         |
| 29               | 0.001 (+0.002, 0.004)         | 1.01 (0.99-1.03)        | 0.275           | 0.724              | 1.00 (0.98-1.03)        | 0.774           | 1.00 (0.96-1.04)        | 0.955           | 1.01 (1.00-1.02)        | 0.087           | 24               | 0.000 (+0.001, 0.002)         |
| 24               | 0.002 (+0.003, 0.006)         | <b>0.96 (0.94-0.98)</b> | <b>1.63E-05</b> | <b>0.002</b>       | <b>0.95 (0.93-0.98)</b> | <b>0.002</b>    | <b>0.95 (0.93-0.97)</b> | <b>0.001</b>    | <b>0.96 (0.94-0.97)</b> | <b>2.84E-02</b> | 42               | -0.002 (+0.006, 0.002)        |
| 42               | 0.007 (+0.005, 0.019)         | 1.01 (0.98-1.05)        | 0.412           | 0.764              | 1.02 (0.98-1.06)        | 0.805           | 1.02 (0.98-1.09)        | 0.637           | 1.01 (0.98-1.04)        | 0.373           | 81               | 0.003 (+0.002, 0.008)         |
| 81               | -0.176 (+0.282, -0.069)       | 0.83 (0.68-1.01)        | 0.067           | 0.568              | NA                      | NA              | NA                      | NA              | NA                      | NA              | 19               | -0.027 (+0.060, 0.006)        |
| 19               | 0.024 (+0.006, 0.042)         | 0.99 (0.97-1.02)        | 0.639           | 0.913              | 1.00 (0.97-1.03)        | 0.828           | 1.00 (0.94-1.05)        | 0.906           | 0.99 (0.97-1.02)        | 0.647           | 37               | 0.016 (+0.000, 0.032)         |
| 37               | 0.011 (+0.032, 0.011)         | 0.97 (0.92-1.02)        | 0.268           | 0.724              | 1.00 (0.94-1.06)        | 0.902           | 0.97 (0.83-1.14)        | 0.739           | 0.97 (0.92-1.02)        | 0.3             | 24               | -0.005 (+0.021, 0.012)        |
| 24               | 0.003 (+0.008, 0.015)         | 0.98 (0.92-1.04)        | 0.516           | 0.846              | 1.00 (0.94-1.07)        | 0.969           | 1.03 (0.81-1.29)        | 0.828           | 0.98 (0.92-1.04)        | 0.534           | 29               | -0.019 (+0.045, 0.007)        |
| 29               | -0.036 (+0.054, 0.007)        | 0.79 (0.67-0.94)        | 0.009           | 0.233              | NA                      | NA              | NA                      | NA              | NA                      | NA              | 27               | -0.006 (+0.031, 0.018)        |
| 27               | 0.049 (+0.036, 0.132)         | 0.82 (0.70-0.95)        | 0.007           | 0.399              | NA                      | NA              | NA                      | NA              | NA                      | NA              | 13               | 0.036 (+0.022, 0.093)         |
| 13               | 0.010 (+0.003, 0.024)         | 1.02 (1.00-1.04)        | 0.115           | 0.622              | 1.00 (0.97-1.04)        | 0.787           | 0.99 (0.94-1.04)        | 0.648           | 1.02 (1.00-1.04)        | 0.108           | 52               | 0.000 (+0.001, 0.001)         |
| 52               | -0.013 (+0.044, 0.017)        | 0.80 (0.64-0.99)        | 0.039           | 0.505              | NA                      | NA              | NA                      | NA              | NA                      | NA              | 17               | -0.017 (+0.046, 0.012)        |
| 17               | -0.020 (+0.061, 0.020)        | 0.97 (0.82-1.02)        | 0.198           | 0.724              | 0.98 (0.92-1.04)        | 0.474           | 0.96 (0.81-1.15)        | 0.685           | 0.97 (0.94-1.00)        | 0.063           | 22               | 0.004 (+0.003, 0.011)         |
| 22               | 0.003 (+0.010, 0.005)         | 1.01 (0.97-1.04)        | 0.667           | 0.913              | 0.99 (0.95-1.04)        | 0.798           | 0.97 (0.87-1.08)        | 0.608           | 1.01 (0.98-1.04)        | 0.629           | 30               | 0.007 (+0.001, 0.014)         |
| 30               | 0.004 (+0.002, 0.010)         | 0.99 (0.92-1.06)        | 0.694           | 0.921              | 0.99 (0.91-1.08)        | 0.787           | 1.05 (0.87-1.28)        | 0.58            | 0.99 (0.95-1.02)        | 0.512           | 137              | -0.001 (+0.005, 0.003)        |
| 137              | -0.004 (+0.009, 0.000)        | 1.00 (0.98-1.02)        | 0.74            | 0.939              | 1.01 (0.98-1.03)        | 0.641           | 1.01 (0.97-1.05)        | 0.7             | 1.00 (0.98-1.02)        | 0.742           | 57               | -0.011 (+0.021, 0.001)        |
| 57               | 0.007 (+0.013, 0.017)         | 0.98 (0.95-1.00)        | 0.069           | 0.57               | 0.99 (0.96-1.03)        | 0.624           | 1.02 (0.96-1.08)        | 0.522           | 0.98 (0.96-1.00)        | 0.069           | 22               | 0.001 (+0.003, 0.005)         |
| 22               | 0.008 (+0.006, 0.011)         | 1.00 (0.95-1.06)        | 0.888           | 0.961              | 1.01 (0.94-1.08)        | 0.862           | 1.11 (0.93-1.34)        | 0.245           | 1.00 (0.96-1.04)        | 0.848           | 59               | 0.003 (+0.003, 0.010)         |
| 59               | 0.039 (+0.016, 0.094)         | 1.06 (0.89-1.26)        | 0.538           | 0.858              | NA                      | NA              | NA                      | NA              | NA                      | NA              | 16               | 0.026 (+0.019, 0.071)         |
| 16               | -0.015 (+0.032, 0.001)        | 1.01 (0.98-1.05)        | 0.509           | 0.838              | 1.02 (0.97-1.07)        | 0.503           | 1.00 (0.91-1.10)        | 0.887           | 1.01 (0.98-1.05)        | 0.512           | 31               | 0.000 (+0.001, 0.000)         |
| 31               | -0.012 (+0.023, 0.000)        | 0.98 (0.96-1.00)        | 0.04            | 0.505              | 0.99 (0.96-1.02)        | 0.606           | 1.02 (0.96-1.08)        | 0.457           | 0.98 (0.96-0.99)        | 0.017           | 36               | 0.004 (+0.002, 0.010)         |
| 36               | -0.023 (+0.044, 0.003)        | 0.98 (0.95-1.02)        | 0.312           | 0.733              | 0.99 (0.95-1.04)        | 0.727           | 1.00 (0.91-1.09)        | 0.93            | 0.98 (0.95-1.01)        | 0.297           | 37               | -0.016 (+0.044, 0.012)        |
| 37               | 0.002 (+0.006, 0.011)         | 1.04 (0.82-1.31)        | 0.768           | 0.939              | NA                      | NA              | NA                      | NA              | NA                      | NA              | 17               | 0.000 (+0.001, 0.002)         |
| 17               | 0.001 (+0.003, 0.005)         | <b>0.95 (0.92-0.98)</b> | <b>0.002</b>    | <b>0.072</b>       | <b>0.94 (0.91-0.98)</b> | <b>0.006</b>    | <b>0.94 (0.87-1.01)</b> | <b>0.108</b>    | <b>0.95 (0.93-0.97)</b> | <b>0.001</b>    | 20               | -0.048 (+0.086, 0.001)        |
| 20               | -0.012 (+0.036, 0.013)        | 0.97 (0.89-1.05)        | 0.409           | 0.763              | 1.00 (0.93-1.08)        | 0.977           | 0.95 (                  |                 |                         |                 |                  |                               |
