# Supplementary material
Source: PubMed Central journal article supplement (PMC9553869)
Supplement: 41416_2022_1923_MOESM4_ESM.pdf [file 41416_2022_1923_MOESM4_ESM.pdf]

Table B1. Bidirectional MR analysis for the identified proteins in the main analysis from breast cancer subtype to proteins.

| protein   | Luminal A-like     |       |                    |                    |          | Luminal B-like        |                    |         |                      |                       |             |                          |
|-----------|--------------------|-------|--------------------|--------------------|----------|-----------------------|--------------------|---------|----------------------|-----------------------|-------------|--------------------------|
|           | IWW DR (95% CI)    | IWW P | IWW FDR-adjusted P | Median DR (95% CI) | Median P | Median FDR-adjusted P | Egger DR (95% CI)  | Egger P | Egger FDR-adjusted P | MR PRESSO DR (95% CI) | MR PRESSO P | MR PRESSO FDR-adjusted P |
| ABO       | 1.04 (1.00 - 1.09) | 0.063 | 0.507              | 1.07 (0.99 - 1.15) | 0.809    | 0.859                 | 1.02 (0.92 - 1.13) | 0.738   | 0.962                | 1.04 (1.00 - 1.09)    | 0.064       | 0.487                    |
| ADGF1     | 1.03 (0.98 - 1.07) | 0.223 | 0.781              | 1.02 (0.92 - 1.13) | 0.863    | 0.811                 | 1.01 (0.91 - 1.11) | 0.861   | 0.966                | 1.04 (0.94 - 1.14)    | 0.086       | 0.480                    |
| ADGRF1    | 1.02 (0.97 - 1.06) | 0.474 | 0.893              | 1.00 (0.91 - 1.10) | 1.005    | 0.975                 | 1.02 (0.92 - 1.10) | 0.867   | 0.975                | 1.02 (0.97 - 1.06)    | 0.469       | 0.879                    |
| ADHD8     | 1.03 (0.98 - 1.08) | 0.254 | 0.773              | 1.03 (0.95 - 1.12) | 0.449    | 0.935                 | 1.08 (0.98 - 1.20) | 0.128   | 0.732                | 1.03 (0.98 - 1.08)    | 0.255       | 0.758                    |
| ANKK7     | 0.97 (0.93 - 1.01) | 0.484 | 0.893              | 0.99 (0.91 - 1.07) | 0.649    | 0.600                 | 0.98 (0.89 - 1.08) | 0.649   | 0.867                | 0.99 (0.93 - 1.05)    | 0.627       | 0.763                    |
| ASP       | 1.00 (0.96 - 1.05) | 0.897 | 0.983              | 1.02 (0.94 - 1.11) | 0.877    | 0.892                 | 1.00 (0.94 - 1.15) | 0.695   | 0.897                | 1.00 (0.91 - 1.11)    | 0.963       | 0.981                    |
| C1GALT1C1 | 1.04 (1.00 - 1.09) | 0.066 | 0.511              | 1.04 (0.97 - 1.13) | 0.272    | 0.585                 | 1.06 (0.97 - 1.16) | 0.451   | 0.889                | 1.04 (1.00 - 1.09)    | 0.067       | 0.495                    |
| CD137N5   | 1.00 (0.95 - 1.05) | 0.39  | 0.89               | 1.01 (0.93 - 1.10) | 0.743    | 0.874                 | 1.05 (0.95 - 1.16) | 0.413   | 0.971                | 1.07 (0.95 - 1.19)    | 0.567       | 0.974                    |
| CAMS1     | 1.02 (0.97 - 1.07) | 0.513 | 0.810              | 1.02 (0.94 - 1.10) | 0.624    | 0.719                 | 1.07 (0.97 - 1.19) | 0.513   | 0.908                | 1.02 (0.97 - 1.07)    | 0.513       | 0.930                    |
| CAMK1D    | 1.02 (0.97 - 1.06) | 0.518 | 0.904              | 1.02 (0.94 - 1.10) | 0.889    | 0.97                  | 1.09 (0.99 - 1.21) | 0.574   | 0.646                | 1.02 (0.97 - 1.06)    | 0.51        | 0.889                    |
| CAST      | 1.01 (0.96 - 1.06) | 0.683 | 0.944              | 0.99 (0.92 - 1.07) | 0.663    | 0.983                 | 0.99 (0.90 - 1.09) | 0.842   | 0.971                | 1.01 (0.97 - 1.05)    | 0.668       | 0.929                    |
| CD206     | 1.02 (0.97 - 1.07) | 0.484 | 0.893              | 0.99 (0.91 - 1.07) | 0.406    | 0.787                 | 0.94 (0.85 - 1.04) | 0.206   | 0.888                | 1.02 (0.97 - 1.07)    | 0.485       | 0.888                    |
| CD300C    | 0.98 (0.94 - 1.03) | 0.484 | 0.895              | 0.97 (0.91 - 1.07) | 0.753    | 0.972                 | 0.97 (0.88 - 1.07) | 0.59    | 0.932                | 0.98 (0.94 - 1.02)    | 0.475       | 0.956                    |
| CDHS      | 0.98 (0.94 - 1.03) | 0.382 | 0.87               | 0.97 (0.90 - 1.05) | 0.47     | 0.942                 | 1.00 (0.90 - 1.10) | 0.964   | 0.994                | 0.98 (0.94 - 1.02)    | 0.348       | 0.837                    |
| CLEC1E1   | 0.97 (0.92 - 1.01) | 0.172 | 0.694              | 0.98 (0.91 - 1.06) | 0.577    | 0.964                 | 0.95 (0.86 - 1.05) | 0.321   | 0.844                | 0.97 (0.92 - 1.01)    | 0.174       | 0.677                    |
| CLK1      | 0.98 (0.94 - 1.03) | 0.49  | 0.895              | 0.98 (0.90 - 1.06) | 0.555    | 0.956                 | 1.01 (0.92 - 1.12) | 0.78    | 0.866                | 0.99 (0.91 - 1.08)    | 0.474       | 0.88                     |
| CPNE1     | 1.00 (0.95 - 1.04) | 0.904 | 0.983              | 1.01 (0.94 - 1.10) | 0.705    | 0.97                  | 1.04 (0.94 - 1.15) | 0.44    | 0.885                | 1.00 (0.95 - 1.04)    | 0.904       | 0.982                    |
| CSF7      | 0.97 (0.93 - 1.02) | 0.281 | 0.786              | 0.94 (0.86 - 1.01) | 1.023    | 0.853                 | 0.96 (0.86 - 1.07) | 0.496   | 0.897                | 0.97 (0.93 - 1.02)    | 0.282       | 0.728                    |
| CTSS      | 1.01 (0.96 - 1.05) | 0.793 | 0.869              | 1.01 (0.94 - 1.09) | 0.806    | 0.979                 | 1.00 (0.90 - 1.11) | 0.988   | 0.997                | 1.00 (0.96 - 1.04)    | 0.793       | 0.966                    |
| DOCK9     | 0.99 (0.95 - 1.04) | 0.663 | 0.927              | 0.99 (0.91 - 1.07) | 0.715    | 0.97                  | 0.93 (0.84 - 1.03) | 0.466   | 0.746                | 0.99 (0.95 - 1.04)    | 0.661       | 0.910                    |
| DPP7      | 0.97 (0.92 - 1.01) | 0.126 | 0.627              | 0.94 (0.87 - 1.01) | 0.114    | 0.86                  | 0.94 (0.85 - 1.04) | 0.228   | 0.803                | 0.97 (0.92 - 1.01)    | 0.113       | 0.589                    |
| ENG       | 1.00 (0.96 - 1.05) | 0.601 | 0.915              | 1.01 (0.94 - 1.10) | 0.72     | 0.971                 | 0.98 (0.89 - 1.09) | 0.728   | 0.96                 | 1.01 (0.97 - 1.06)    | 0.593       | 0.993                    |
| ERAP1     | 1.00 (0.96 - 1.05) | 0.871 | 0.98               | 1.00 (0.92 - 1.08) | 0.925    | 0.992                 | 1.01 (0.92 - 1.12) | 0.809   | 0.966                | 1.00 (0.96 - 1.05)    | 0.868       | 0.978                    |
| F8        | 0.97 (0.93 - 1.02) | 0.237 | 0.756              | 0.99 (0.91 - 1.07) | 0.771    | 0.973                 | 0.96 (0.87 - 1.07) | 0.462   | 0.889                | 0.97 (0.93 - 1.02)    | 0.238       | 0.745                    |
| FAM3AD    | 0.98 (0.93 - 1.04) | 0.88  | 0.963              | 0.99 (0.91 - 1.09) | 0.706    | 0.988                 | 0.98 (0.89 - 1.08) | 0.644   | 0.981                | 0.99 (0.94 - 1.03)    | 0.475       | 0.88                     |
| FAS       | 0.96 (0.92 - 1.01) | 0.1   | 0.597              | 0.96 (0.92 - 1.01) | 0.603    | 0.968                 | 0.96 (0.91 - 1.01) | 0.989   | 0.957                | 0.97 (0.92 - 1.01)    | 0.085       | 0.502                    |
| FCGR2A    | 0.92 (0.88 - 0.97) | 0.001 | 0.093              | 0.92 (0.85 - 1.00) | 0.433    | 0.772                 | 0.98 (0.90 - 1.08) | 0.064   | 0.001                | 0.92 (0.88 - 0.97)    | 0.001       | 0.082                    |
| FGB1      | 1.09 (1.05 - 1.13) | 0.021 | 0.093              | 1.05 (0.89 - 1.23) | 0.023    | 0.046                 | 0.94 (0.83 - 1.01) | 0.224   | 0.040                | 0.93 (0.81 - 1.05)    | 0.077       | 0.063                    |
| FGR       | 1.01 (0.97 - 1.06) | 0.59  | 0.983              | 1.02 (0.95 - 1.13) | 0.548    | 0.661                 | 1.06 (0.98 - 1.15) | 0.021   | 0.646                | 1.06 (0.98 - 1.15)    | 0.591       | 0.903                    |
| FLT4      | 1.01 (0.96 - 1.05) | 0.75  | 0.955              | 1.04 (0.96 - 1.13) | 0.616    | 0.94                  | 0.97 (0.88 - 1.08) | 0.176   | 0.941                | 1.01 (0.96 - 1.05)    | 0.746       | 0.952                    |
| FLT3      | 0.98 (0.93 - 1.03) | 0.376 | 0.867              | 0.97 (0.90 - 1.06) | 0.522    | 0.951                 | 1.01 (0.91 - 1.13) | 0.806   | 0.966                | 0.98 (0.93 - 1.03)    | 0.377       | 0.854                    |
| GMRP      | 1.01 (0.97 - 1.05) | 0.339 | 0.853              | 0.99 (0.90 - 1.08) | 0.553    | 0.905                 | 0.99 (0.90 - 1.09) | 0.904   | 0.883                | 0.99 (0.93 - 1.07)    | 0.317       | 0.830                    |
| GILTR1    | 0.95 (0.91 - 0.99) | 0.029 | 0.039              | 0.95 (0.89 - 1.03) | 0.219    | 0.871                 | 0.91 (0.82 - 1.01) | 0.074   | 0.646                | 0.96 (0.88 - 1.04)    | 0.286       | 0.956                    |
| GLIS      | 1.03 (0.99 - 1.08) | 0.17  | 0.694              | 1.03 (0.96 - 1.13) | 0.353    | 0.809                 | 1.05 (0.95 - 1.16) | 0.326   | 0.846                | 1.03 (0.99 - 1.08)    | 0.161       | 0.676                    |
| GNAS1     | 1.00 (0.95 - 1.05) | 0.613 | 0.927              | 1.00 (0.92 - 1.08) | 0.649    | 0.809                 | 0.97 (0.87 - 1.07) | 0.529   | 0.983                | 0.99 (0.94 - 1.04)    | 0.613       | 0.959                    |
| GP21L     | 1.02 (0.97 - 1.07) | 0.407 | 0.907              | 1.00 (0.93 - 1.08) | 0.994    | 0.978                 | 1.01 (0.91 - 1.12) | 0.84    | 0.972                | 1.02 (0.98 - 1.06)    | 0.374       | 0.852                    |
| GRIHA4    | 1.04 (0.99 - 1.09) | 0.091 | 0.569              | 1.02 (0.94 - 1.11) | 0.591    | 0.968                 | 1.09 (0.98 - 1.20) | 0.01    | 0.693                | 1.04 (1.00 - 1.09)    | 0.075       | 0.508                    |
| HBE2      | 1.05 (1.01 - 1.09) | 0.022 | 0.088              | 1.04 (0.92 - 1.18) | 0.031    | 0.096                 | 0.95 (0.91 - 1.03) | 0.657   | 0.962                | 0.95 (0.91 - 1.03)    | 0.672       | 0.987                    |
| HSPALL1   | 0.99 (0.94 - 1.06) | 0.613 | 0.917              | 1.00 (0.92 - 1.08) | 0.954    | 0.966                 | 1.01 (0.92 - 1.12) | 0.794   | 0.966                | 0.99 (0.95 - 1.03)    | 0.604       | 0.920                    |
| ICAM1     | 1.01 (0.97 - 1.03) | 0.611 | 0.903              | 1.04 (0.96 - 1.12) | 0.366    | 0.903                 | 1.07 (0.96 - 1.18) | 0.233   | 0.803                | 1.06 (0.97 - 1.15)    | 0.194       | 0.593                    |
| ICAM2     | 1.01 (0.97 - 1.06) | 0.619 | 0.917              | 1.04 (0.96 - 1.13) | 0.353    | 0.903                 | 1.05 (0.95 - 1.16) | 0.313   | 0.841                | 1.01 (0.97 - 1.06)    | 0.599       | 0.904                    |
| ICAM5     | 0.99 (0.95 - 1.06) | 0.499 | 0.895              | 1.00 (0.92 - 1.09) | 0.653    | 0.905                 | 0.99 (0.91 - 1.09) | 0.904   | 0.883                | 0.99 (0.92 - 1.07)    | 0.904       | 0.981                    |
| IGFBP1    | 1.02 (0.97 - 1.06) | 0.495 | 0.895              | 1.04 (0.96 - 1.12) | 0.372    | 0.907                 | 1.07 (0.97 - 1.18) | 0.184   | 0.769                | 1.02 (0.97 - 1.06)    | 0.486       | 0.88                     |
| IL13RA1   | 1.03 (0.98 - 1.08) | 0.199 | 0.733              | 1.03 (0.93 - 1.09) | 0.839    | 0.98                  | 1.07 (0.97 - 1.19) | 0.186   | 0.774                | 1.03 (0.98 - 1.08)    | 0.2         | 0.72                     |
| IL17B1    | 1.01 (0.96 - 1.05) | 0.663 | 0.927              | 1.01 (0.93 - 1.08) | 0.741    | 0.963                 | 1.01 (0.91 - 1.11) | 0.614   | 0.941                | 1.01 (0.96 - 1.05)    | 0.614       | 0.934                    |
| IL18R1    | 1.01 (0.96 - 1.05) | 0.79  | 0.949              | 1.03 (0.96 - 1.12) | 0.418    | 0.926                 | 1.09 (0.99 - 1.21) | 0.09    | 0.683                | 1.03 (0.98 - 1.05)    | 0.79        | 0.983                    |
| IL28R     | 1.03 (0.98 - 1.05) | 0.989 | 0.997              | 1.00 (0.93 - 1.08) | 0.958    | 0.992                 | 1.08 (0.99 - 1.18) | 0.684   | 0.952                | 1.00 (0.96 - 1.04)    | 0.988       | 0.972                    |
| IL28RA    | 1.03 (0.98 - 1.05) | 0.133 | 0.603              | 1.06 (0.89 - 1.26) | 0.033    | 0.093                 | 0.95 (0.91 - 1.13) | 0.365   | 0.974                | 0.98 (0.92 - 1.04)    | 0.365       | 0.974                    |
| IL6       | 1.05 (1.00 - 1.10) | 0.49  | 0.863              | 1.02 (0.94 - 1.10) | 0.603    | 0.944                 | 1.09 (0.99 - 1.19) | 0.624   | 0.944                | 1.05 (1.00 - 1.10)    | 0.044       | 0.428                    |
| INSR      | 1.00 (0.95 - 1.04) | 0.861 | 0.958              | 0.98 (0.90 - 1.06) | 0.617    | 0.829                 | 1.02 (0.92 - 1.13) | 0.698   | 0.955                | 1.00 (0.95 - 1.04)    | 0.853       | 0.974                    |
| INS2      | 0.98 (0.94 - 1.03) | 0.488 | 0.895              | 0.99 (0.92 - 1.07) | 0.829    | 0.979                 | 1.02 (0.92 - 1.13) | 0.72    | 0.962                | 0.98 (0.94 - 1.03)    | 0.488       | 0.883                    |
| KDR       | 1.00 (0.95 - 1.05) | 0.824 | 0.905              | 1.00 (0.92 - 1.08) | 0.864    | 0.966                 | 1.01 (0.91 - 1.11) | 0.866   | 0.949                | 1.00 (0.95 - 1.05)    | 0.824       | 0.969                    |
| KIR2DL3   | 1.00 (0.96 - 1.05) | 0.881 | 0.988              | 1.02 (0.94 - 1.10) | 0.656    | 0.858                 | 1.04 (0.95 - 1.15) | 0.385   | 0.858                | 1.00 (0.96 - 1.05)    | 0.88        | 0.979                    |
| KLHL13    | 1.04 (0.99 - 1.08) | 0.131 | 0.633              | 1.04 (0.93 - 1.08) | 0.955    | 0.992                 | 1.00 (0.90 - 1.10) | 0.954   | 0.991                | 1.03 (0.94 - 1.12)    | 0.521       | 0.889                    |
| LCAM      | 1.04 (0.99 - 1.09) | 0.111 | 0.611              | 1.05 (0.98 - 1.15) | 0.375    | 0.856                 | 1.05 (0.95 - 1.16) | 0.35    | 0.856                | 1.04 (0.99 - 1.09)    | 0.111       | 0.611                    |
| LACT      | 0.97 (0.93 - 1.01) | 0.159 | 0.689              | 0.97 (0.90 - 1.05) | 0.488    | 0.95                  | 0.97 (0.88 - 1.08) | 0.616   | 0.941                | 0.98 (0.93 - 1.01)    | 0.152       | 0.651                    |
| LEG1      | 1.01 (0.95 - 1.08) | 0.74  | 0.955              | 1.02 (0.94 - 1.10) | 0.703    | 0.97                  | 0.98 (0.85 - 1.13) | 0.761   | 0.965                | 1.01 (0.95 - 1.08)    | 0.74        | 0.951                    |
| LEC1L     | 1.09 (1.04 - 1.14) | 0.070 | 0.093              | 1.11 (1.01 - 1.20) | 0.01     | 0.01                  | 1.14 (1.03 - 1.26) | 0.01    | 0.45                 | 1.11 (1.04 - 1.19)    | 0.070       | 0.078                    |
| MAN1B1    | 1.03 (0.98 - 1.08) | 0.199 | 0.733              | 1.05 (0.97 - 1.14) | 0.712    | 0.871                 | 1.04 (0.94 - 1.15) | 0.446   | 0.888                | 1.04 (0.98 - 1.10)    | 0.201       | 0.72                     |
| MAMBA     | 1.02 (0.97 - 1.08) | 0.341 | 0.84               | 1.01 (0.93 - 1.09) | 0.988    | 0.979                 | 0.97 (0.87 - 1.09) | 0.63    | 0.944                | 1.02 (0.97 - 1.08)    | 0.342       | 0.83                     |
| MECB      | 1.01 (0.97 - 1.06) | 0.642 | 0.926              | 1.02 (0.94 - 1.10) | 0.656    | 0.968                 | 0.99 (0.90 - 1.10) | 0.858   | 0.974                | 1.01 (0.97 - 1.06)    | 0.642       | 0.92                     |
| NDUFS4    | 1.00 (0.95 - 1.05) | 0.993 | 0.998              | 0.98 (0.90 - 1.05) | 0.541    | 0.951                 | 1.06 (0.96 - 1.17) | 0.236   | 0.808                | 1.00 (0.96 - 1.05)    | 0.993       | 0.998                    |
| MIL2      | 1.04 (0.99 - 1.09) | 0.133 | 0.607              | 1.02 (0.94 - 1.10) | 0.652    | 0.968                 | 1.06 (0.96 - 1.17) | 0.233   | 0.807                | 1.04 (0.99 - 1.08)    | 0.098       | 0.678                    |
| MMP13     | 0.98 (0.94 - 1.03) | 0.502 | 0.9                | 0.99 (0.92 - 1.07) | 0.824    | 0.979                 | 0.97 (0.88 - 1.08) | 0.597   | 0.933                | 0.98 (0.94 - 1.03)    | 0.503       | 0.889                    |
| NFYA      | 1.00 (0.95 - 1.05) | 0.799 | 0.996              | 1.00 (0.92 - 1.08) | 0.923    | 0.992                 | 0.99 (0.89 - 1.10) | 0.733   | 0.996                | 1.02 (0.94 - 1.11)    | 0.659       | 0.996                    |
| NPFF      | 0.99 (0.94 - 1.04) | 0.687 | 0.945              | 1.03 (0.95 - 1.11) | 0.435    | 0.934                 | 0.94 (0.84 - 1.04) | 0.687   | 0.646                | 1.06 (0.98 - 1.15)    | 0.445       | 0.993                    |
| NRP1      | 1.02 (0.97 - 1.06) | 0.513 | 0.9                | 0.98 (0.91 - 1.06) | 0.669    | 0.968                 | 1.01 (0.93 - 1.14) | 0.55    | 0.917                | 1.02 (0.97 - 1.06)    | 0.514       | 0.889                    |
| NRP3      | 1.02 (0.98 - 1.07) | 0.362 | 0.838              | 1.01 (0.93 - 1.09) | 0.79     | 0.977                 | 1.04 (0.94 - 1.15) | 0.442   | 0.885                | 1.03 (0.98 - 1.07)    | 0.347       | 0.837                    |
| PCDH8     | 1.00 (0.95 - 1.05) | 0.884 | 0.982              | 1.00 (0.92 - 1.08) | 0.879    | 0.987                 | 1.00 (0.96 - 1.05) | 0.824   | 0.979                | 1.00 (0.96 - 1.05)    | 0.879       | 0.979                    |
| PDGFR1    | 0.99 (0.94 - 1.04) | 0.603 | 0.916              | 0.99 (0.91 - 1.07) | 0.755    | 0.974                 | 0.96 (0.86 - 1.08) | 0.646   | 0.944                | 0.99 (0.94 - 1.04)    | 0.604       | 0.946                    |
| PDK1      | 0.95 (0.91 - 0.99) | 0.023 | 0.038              | 0                  |          |                       |                    |         |                      |                       |             |                          |

| LUMINAL/HER2 negative file |                          |                    |                       |                    |                    |                       |                   |                    |                      |                       |                    |                          |                    | HER2 Enriched file    |                    |          |                       |                   |         |                      |       |       |  |  |  |  |  |
|----------------------------|--------------------------|--------------------|-----------------------|--------------------|--------------------|-----------------------|-------------------|--------------------|----------------------|-----------------------|--------------------|--------------------------|--------------------|-----------------------|--------------------|----------|-----------------------|-------------------|---------|----------------------|-------|-------|--|--|--|--|--|
| MR.PRESSO P                | MR.PRESSO FDR-Adjusted P | I.V.V. OR (95% CI) | I.V.V. FDR-Adjusted P | Median OR (95% CI) | Median P           | Median FDR-Adjusted P | Egger OR (95% CI) | Egger P            | Egger FDR-Adjusted P | MR.PRESSO OR (95% CI) | MR.PRESSO P        | MR.PRESSO FDR-Adjusted P | I.V.V. OR (95% CI) | I.V.V. FDR-Adjusted P | Median OR (95% CI) | Median P | Median FDR-Adjusted P | Egger OR (95% CI) | Egger P | Egger FDR-Adjusted P |       |       |  |  |  |  |  |
| 0.186                      | 0.933                    | 1.07 (0.96 - 1.20) | 0.193                 | 0.997              | 1.06 (0.92 - 1.22) | 0.418                 | 0.97              | 1.05 (0.97 - 1.40) | 0.744                | 0.986                 | 1.07 (0.96 - 1.20) | 0.207                    | 0.977              | 1.10 (0.97 - 1.24)    | 0.132              | 1.00     | 1.08 (0.92 - 1.27)    | 0.321             | 1.00    | 1.75 (0.96 - 3.22)   | 0.07  | 0.678 |  |  |  |  |  |
| 0.427                      | 0.982                    | 1.02 (0.89 - 1.16) | 0.24                  | 0.997              | 0.92 (0.80 - 1.06) | 0.16                  | 0.24              | 0.95 (0.85 - 1.11) | 0.605                | 0.983                 | 1.01 (0.91 - 1.12) | 0.525                    | 0.969              | 1.01 (0.88 - 1.15)    | 0.663              | 1.00     | 1.01 (0.85 - 1.19)    | 0.633             | 1.00    | 2.05 (0.90 - 4.72)   | 0.03  | 0.693 |  |  |  |  |  |
| 0.689                      | 0.992                    | 1.03 (0.93 - 1.13) | 0.599                 | 0.997              | 1.01 (0.88 - 1.16) | 0.892                 | 0.999             | 0.82 (0.64 - 1.04) | 0.096                | 0.944                 | 1.03 (0.93 - 1.13) | 0.604                    | 0.977              | 1.02 (0.91 - 1.16)    | 0.692              | 1.00     | 1.01 (0.86 - 1.18)    | 0.941             | 1.00    | 0.78 (0.43 - 1.44)   | 0.43  | 0.931 |  |  |  |  |  |
| 0.61                       | 0.999                    | 1.05 (0.96 - 1.15) | 0.281                 | 0.997              | 1.06 (0.93 - 1.22) | 0.389                 | 0.965             | 1.11 (0.88 - 1.41) | 0.377                | 0.963                 | 1.05 (0.96 - 1.14) | 0.268                    | 0.977              | 1.10 (0.98 - 1.30)    | 0.232              | 1.00     | 1.00 (0.85 - 1.19)    | 0.957             | 1.00    | 1.66 (0.74 - 3.72)   | 0.215 | 0.835 |  |  |  |  |  |
| 0.714                      | 0.999                    | 1.01 (0.89 - 1.16) | 0.666                 | 0.997              | 0.91 (0.80 - 1.04) | 0.207                 | 0.994             | 0.68 (0.56 - 0.83) | 0.064                | 0.946                 | 1.06 (0.96 - 1.16) | 0.094                    | 0.969              | 1.06 (0.95 - 1.18)    | 0.666              | 1.00     | 1.04 (0.89 - 1.21)    | 0.665             | 1.00    | 1.07 (0.58 - 1.95)   | 0.049 | 0.928 |  |  |  |  |  |
| 0.993                      | 0.999                    | 1.01 (0.89 - 1.16) | 0.826                 | 0.997              | 1.01 (0.89 - 1.16) | 0.836                 | 0.998             | 1.29 (0.91 - 1.63) | 0.038                | 0.881                 | 1.00 (0.92 - 1.11) | 0.268                    | 0.977              | 1.03 (0.91 - 1.16)    | 0.662              | 1.00     | 1.00 (0.85 - 1.17)    | 0.984             | 1.00    | 1.49 (0.81 - 2.74)   | 0.195 | 0.816 |  |  |  |  |  |
| 0.932                      | 0.992                    | 0.98 (0.90 - 1.08) | 0.711                 | 0.997              | 0.98 (0.86 - 1.11) | 0.718                 | 0.994             | 1.02 (0.80 - 1.29) | 0.896                | 0.993                 | 0.98 (0.91 - 1.07) | 0.686                    | 0.987              | 1.00 (0.89 - 1.13)    | 0.963              | 1.00     | 1.00 (0.87 - 1.16)    | 0.95              | 1.00    | 1.03 (0.56 - 1.88)   | 0.932 | 0.988 |  |  |  |  |  |
| 0.792                      | 0.997                    | 1.02 (0.89 - 1.06) | 0.534                 | 0.997              | 1.02 (0.89 - 1.06) | 0.534                 | 0.997             | 0.97 (0.76 - 1.24) | 0.836                | 0.976                 | 1.06 (0.98 - 1.16) | 0.521                    | 0.987              | 1.06 (0.98 - 1.19)    | 0.367              | 1.00     | 1.00 (0.88 - 1.15)    | 0.927             | 1.00    | 1.06 (0.58 - 1.95)   | 0.347 | 0.817 |  |  |  |  |  |
| 0.935                      | 0.992                    | 0.98 (0.87 - 1.03) | 0.348                 | 0.997              | 0.98 (0.84 - 1.11) | 0.711                 | 0.975             | 1.17 (0.92 - 1.50) | 0.195                | 0.945                 | 1.12 (0.97 - 1.30) | 0.153                    | 0.977              | 1.10 (0.97 - 1.24)    | 0.369              | 1.00     | 1.01 (0.89 - 1.16)    | 0.905             | 1.00    | 1.62 (0.88 - 2.92)   | 0.191 | 0.886 |  |  |  |  |  |
| 0.482                      | 0.967                    | 1.02 (0.93 - 1.12) | 0.628                 | 0.997              | 1.02 (0.91 - 1.18) | 0.603                 | 0.987             | 1.06 (0.84 - 1.34) | 0.629                | 0.986                 | 1.02 (0.94 - 1.11) | 0.612                    | 0.977              | 1.08 (0.96 - 1.22)    | 0.202              | 1.00     | 1.08 (0.92 - 1.26)    | 0.344             | 1.00    | 1.62 (0.88 - 2.92)   | 0.191 | 0.886 |  |  |  |  |  |
| 0.569                      | 0.999                    | 0.97 (0.89 - 1.06) | 0.529                 | 0.997              | 0.97 (0.85 - 1.11) | 0.659                 | 0.99              | 0.93 (0.73 - 1.19) | 0.572                | 0.979                 | 0.97 (0.89 - 1.06) | 0.632                    | 0.977              | 0.97 (0.85 - 1.10)    | 0.621              | 1.00     | 1.03 (0.79 - 1.09)    | 0.359             | 1.00    | 1.10 (0.54 - 2.23)   | 0.802 | 0.978 |  |  |  |  |  |
| 0.433                      | 0.966                    | 0.96 (0.84 - 1.05) | 0.274                 | 0.997              | 0.96 (0.84 - 1.05) | 0.274                 | 0.997             | 0.98 (0.85 - 1.13) | 0.895                | 0.993                 | 0.94 (0.84 - 1.05) | 0.458                    | 0.977              | 0.96 (0.85 - 1.07)    | 0.012              | 1.00     | 0.88 (0.75 - 1.03)    | 0.12              | 1.00    | 1.05 (0.59 - 1.89)   | 0.04  | 0.984 |  |  |  |  |  |
| 0.527                      | 0.973                    | 0.96 (0.86 - 1.07) | 0.476                 | 0.997              | 0.96 (0.86 - 1.07) | 0.476                 | 0.997             | 0.83 (0.63 - 1.10) | 0.197                | 0.945                 | 0.96 (0.86 - 1.07) | 0.484                    | 0.977              | 0.88 (0.78 - 0.99)    | 0.203              | 1.00     | 0.87 (0.75 - 1.02)    | 0.458             | 1.00    | 0.83 (0.45 - 1.52)   | 0.547 | 0.952 |  |  |  |  |  |
| 0.644                      | 0.992                    | 0.98 (0.89 - 1.07) | 0.604                 | 0.997              | 1.00 (0.88 - 1.14) | 0.592                 | 0.999             | 0.95 (0.75 - 1.20) | 0.657                | 0.986                 | 0.98 (0.90 - 1.06) | 0.589                    | 0.977              | 0.92 (0.81 - 1.05)    | 0.309              | 1.00     | 0.94 (0.80 - 1.11)    | 0.486             | 1.00    | 0.77 (0.37 - 1.60)   | 0.482 | 0.944 |  |  |  |  |  |
| 0.319                      | 0.95                     | 0.94 (0.85 - 1.05) | 0.282                 | 0.997              | 0.96 (0.75 - 0.98) | 0.038                 | 0.959             | 0.78 (0.59 - 1.02) | 0.073                | 0.944                 | 0.94 (0.85 - 1.05) | 0.94                     | 0.977              | 0.99 (0.81 - 1.22)    | 0.96               | 1.00     | 1.02 (0.85 - 1.24)    | 0.798             | 1.00    | 0.81 (0.25 - 2.71)   | 0.719 | 0.969 |  |  |  |  |  |
| 0.825                      | 0.992                    | 0.99 (0.91 - 1.09) | 0.874                 | 0.997              | 0.98 (0.86 - 1.13) | 0.812                 | 0.997             | 0.99 (0.78 - 1.25) | 0.993                | 0.998                 | 0.99 (0.91 - 1.08) | 0.812                    | 0.99               | 0.99 (0.87 - 1.11)    | 0.837              | 1.00     | 0.98 (0.84 - 1.14)    | 0.767             | 1.00    | 1.16 (0.63 - 2.12)   | 0.64  | 0.967 |  |  |  |  |  |
| 0.425                      | 0.966                    | 1.07 (0.97 - 1.17) | 0.168                 | 0.997              | 1.11 (0.97 - 1.26) | 0.117                 | 0.959             | 0.95 (0.75 - 1.20) | 0.663                | 0.986                 | 1.07 (0.98 - 1.15) | 0.135                    | 0.987              | 1.06 (0.93 - 1.18)    | 0.59               | 1.00     | 1.02 (0.87 - 1.19)    | 0.842             | 1.00    | 0.52 (0.28 - 0.95)   | 0.032 | 0.655 |  |  |  |  |  |
| 0.026                      | 0.915                    | 0.93 (0.85 - 1.02) | 0.122                 | 0.997              | 0.92 (0.80 - 1.04) | 0.191                 | 0.959             | 0.80 (0.68 - 1.09) | 0.224                | 0.945                 | 0.93 (0.86 - 1.00) | 0.88                     | 0.977              | 0.97 (0.85 - 1.09)    | 0.568              | 1.00     | 0.95 (0.82 - 1.09)    | 0.488             | 1.00    | 0.88 (0.48 - 1.62)   | 0.69  | 0.967 |  |  |  |  |  |
| 0.212                      | 0.933                    | 0.99 (0.90 - 1.10) | 0.934                 | 0.997              | 0.99 (0.87 - 1.13) | 0.907                 | 0.999             | 1.09 (0.84 - 1.43) | 0.509                | 0.979                 | 0.99 (0.89 - 1.10) | 0.915                    | 0.993              | 0.91 (0.78 - 1.07)    | 0.256              | 1.00     | 0.91 (0.77 - 1.07)    | 0.267             | 1.00    | 1.25 (0.55 - 2.84)   | 0.591 | 0.956 |  |  |  |  |  |
| 0.221                      | 0.933                    | 0.96 (0.88 - 1.05) | 0.4                   | 0.997              | 0.96 (0.88 - 1.05) | 0.4                   | 0.997             | 1.07 (0.84 - 1.36) | 0.577                | 0.979                 | 0.96 (0.88 - 1.05) | 0.737                    | 0.977              | 0.97 (0.85 - 1.08)    | 0.489              | 1.00     | 0.97 (0.84 - 1.13)    | 0.716             | 1.00    | 1.13 (0.72 - 1.41)   | 0.38  | 0.911 |  |  |  |  |  |
| 0.176                      | 0.933                    | 0.92 (0.84 - 1.01) | 0.07                  | 0.997              | 0.93 (0.81 - 1.06) | 0.273                 | 0.959             | 0.82 (0.65 - 1.04) | 0.098                | 0.944                 | 0.92 (0.85 - 0.99) | 0.049                    | 0.977              | 1.06 (0.94 - 1.20)    | 0.356              | 1.00     | 1.13 (0.96 - 1.34)    | 0.133             | 1.00    | 0.70 (0.38 - 1.28)   | 0.24  | 0.853 |  |  |  |  |  |
| 0.867                      | 0.952                    | 0.90 (0.80 - 1.00) | 0.72                  | 0.997              | 1.02 (0.88 - 1.16) | 0.808                 | 0.967             | 1.01 (0.79 - 1.29) | 0.943                | 0.988                 | 0.99 (0.90 - 1.08) | 0.775                    | 0.988              | 0.94 (0.83 - 1.06)    | 0.313              | 1.00     | 0.97 (0.83 - 1.14)    | 0.225             | 1.00    | 0.59 (0.32 - 1.08)   | 0.086 | 0.66  |  |  |  |  |  |
| 0.233                      | 0.933                    | 0.97 (0.88 - 1.06) | 0.464                 | 0.997              | 0.97 (0.88 - 1.06) | 0.464                 | 0.994             | 1.07 (0.84 - 1.36) | 0.6                  | 0.983                 | 0.97 (0.88 - 1.06) | 0.742                    | 0.977              | 0.97 (0.87 - 1.12)    | 0.815              | 1.00     | 1.03 (0.88 - 1.21)    | 0.704             | 1.00    | 1.38 (0.75 - 2.54)   | 0.295 | 0.871 |  |  |  |  |  |
| 0.08                       | 0.919                    | 0.92 (0.84 - 1.02) | 0.103                 | 0.997              | 0.95 (0.83 - 1.08) | 0.413                 | 0.97              | 0.95 (0.73 - 1.23) | 0.704                | 0.986                 | 0.92 (0.84 - 1.02) | 0.118                    | 0.977              | 0.97 (0.86 - 1.10)    | 0.659              | 1.00     | 0.94 (0.80 - 1.09)    | 0.396             | 1.00    | 0.98 (0.53 - 1.82)   | 0.946 | 0.991 |  |  |  |  |  |
| 0.795                      | 0.992                    | 1.00 (0.92 - 1.10) | 0.943                 | 0.997              | 1.03 (0.91 - 1.17) | 0.663                 | 0.993             | 0.91 (0.72 - 1.16) | 0.446                | 0.979                 | 1.00 (0.94 - 1.07) | 0.918                    | 0.993              | 1.14 (1.01 - 1.29)    | 0.03               | 1.00     | 1.11 (0.95 - 1.30)    | 0.172             | 1.00    | 0.93 (0.51 - 1.73)   | 0.824 | 0.978 |  |  |  |  |  |
| 0.32                       | 0.95                     | 0.98 (0.90 - 1.08) | 0.716                 | 0.997              | 0.95 (0.83 - 1.08) | 0.413                 | 0.97              | 0.95 (0.73 - 1.23) | 0.704                | 0.986                 | 0.92 (0.84 - 1.02) | 0.118                    | 0.977              | 0.97 (0.86 - 1.10)    | 0.659              | 1.00     | 0.94 (0.80 - 1.09)    | 0.396             | 1.00    | 0.98 (0.53 - 1.82)   | 0.946 | 0.991 |  |  |  |  |  |
| 0.021                      | 0.893                    | 0.92 (0.84 - 1.01) | 0.088                 | 0.997              | 0.88 (0.77 - 1.01) | 0.069                 | 0.959             | 0.88 (0.70 - 1.12) | 0.3                  | 0.948                 | 0.92 (0.85 - 1.00) | 0.074                    | 0.977              | 0.96 (0.82 - 1.12)    | 0.6                | 1.00     | 0.92 (0.82 - 1.13)    | 0.673             | 1.00    | 0.78 (0.33 - 1.82)   | 0.655 | 0.952 |  |  |  |  |  |
| 0.428                      | 0.933                    | 0.99 (0.89 - 1.07) | 0.557                 | 0.997              | 1.03 (0.90 - 1.19) | 0.557                 | 0.997             | 0.86 (0.68 - 1.06) | 0.25                 | 0.940                 | 0.90 (0.82 - 1.00) | 0.510                    | 0.977              | 1.10 (0.98 - 1.25)    | 0.112              | 1.00     | 0.99 (0.89 - 1.27)    | 0.303             | 1.00    | 0.90 (0.49 - 1.65)   | 0.717 | 0.930 |  |  |  |  |  |
| 0.193                      | 0.933                    | 0.90 (0.89 - 1.10) | 0.934                 | 0.997              | 1.00 (0.87 - 1.15) | 0.977                 | 0.999             | 1.14 (0.84 - 1.54) | 0.406                | 0.972                 | 1.09 (0.89 - 1.31) | 0.915                    | 0.993              | 1.03 (0.94 - 1.20)    | 0.608              | 1.00     | 1.05 (0.89 - 1.24)    | 0.554             | 1.00    | 1.40 (0.62 - 3.17)   | 0.417 | 0.926 |  |  |  |  |  |
| 0.176                      | 0.933                    | 0.97 (0.88 - 1.06) | 0.483                 | 0.997              | 0.95 (0.92 - 1.20) | 0.483                 | 0.997             | 1.13 (0.88 - 1.43) | 0.338                | 0.955                 | 0.97 (0.88 - 1.06) | 0.487                    | 0.977              | 0.94 (0.83 - 1.06)    | 0.286              | 1.00     | 0.94 (0.81 - 1.09)    | 0.449             | 1.00    | 0.94 (0.46 - 1.54)   | 0.699 | 0.952 |  |  |  |  |  |
| 0.992                      | 0.992                    | 1.06 (0.96 - 1.16) | 0.268                 | 0.997              | 0.99 (0.88 - 1.13) | 0.893                 | 0.997             | 1.17 (0.90 - 1.51) | 0.236                | 0.945                 | 1.06 (0.96 - 1.16) | 0.428                    | 0.977              | 0.97 (0.86 - 1.09)    | 0.586              | 1.00     | 0.97 (0.83 - 1.13)    | 0.609             | 1.00    | 1.55 (0.85 - 2.85)   | 0.156 | 0.793 |  |  |  |  |  |
| 0.724                      | 0.992                    | 1.00 (0.92 - 1.10) | 0.922                 | 0.997              | 1.02 (0.90 - 1.16) | 0.922                 | 0.999             | 0.95 (0.83 - 1.09) | 0.532                | 0.978                 | 0.98 (0.90 - 1.08) | 0.494                    | 0.977              | 0.98 (0.88 - 1.12)    | 0.608              | 1.00     | 0.98 (0.85 - 1.14)    | 0.758             | 1.00    | 1.49 (0.81 - 2.71)   | 0.201 | 0.844 |  |  |  |  |  |
| 0.278                      | 0.943                    | 0.91 (0.83 - 0.99) | 0.031                 | 0.997              | 0.83 (0.73 - 0.94) | 0.044                 | 0.959             | 0.82 (0.64 - 1.03) | 0.093                | 0.944                 | 0.97 (0.88 - 1.06) | 0.036                    | 0.977              | 1.00 (0.87 - 1.15)    | 0.997              | 1.00     | 0.95 (0.81 - 1.13)    | 0.588             | 1.00    | 1.50 (0.78 - 2.89)   | 0.226 | 0.841 |  |  |  |  |  |
| 0.635                      | 0.99                     | 1.03 (0.94 - 1.13) | 0.489                 | 0.997              | 1.06 (0.92 - 1.21) | 0.432                 | 0.977             | 1.03 (0.78 - 1.28) | 0.972                | 0.998                 | 1.03 (0.94 - 1.13) | 0.497                    | 0.977              | 1.03 (0.89 - 1.19)    | 0.703              | 1.00     | 1.04 (0.88 - 1.23)    | 0.646             | 1.00    | 0.58 (0.32 - 1.06)   | 0.708 | 0.69  |  |  |  |  |  |
| 0.867                      | 0.952                    | 1.03 (0.94 - 1.13) | 0.927                 | 0.997              | 1.03 (0.94 - 1.13) | 0.927                 | 0.997             | 1.01 (0.82 - 1.27) | 0.407                | 0.974                 | 1.01 (0.92 - 1.12) | 0.407                    | 0.977              | 1.01 (0.92 - 1.12)    | 0.407              | 1.00     | 1.01 (0.82 - 1.27)    | 0.407             | 1.00    | 1.51 (0.68 - 3.37)   | 0.497 | 0.804 |  |  |  |  |  |
| 0.895                      | 0.992                    | 0.98 (0.90 - 1.08) | 0.726                 | 0.997              | 0.98 (0.90 - 1.08) | 0.726                 | 0.997             | 0.90 (0.70 - 1.15) | 0.388                | 0.968                 | 0.98 (0.90 - 1.08) | 0.726                    | 0.988              | 0.97 (0.86 - 1.09)    | 0.616              | 1.00     | 0.95 (0.81 - 1.10)    | 0.477             | 1.00    | 1.08 (0.59 - 1.98)   | 0.799 | 0.978 |  |  |  |  |  |
| 0.929                      | 0.992                    | 1.01 (0.92 - 1.10) | 0.885                 | 0.997              | 1.02 (0.89 - 1.17) | 0.74                  | 0.994             | 1.06 (0.84 - 1.34) | 0.63                 | 0.986                 | 1.01 (0.92 - 1.10) | 0.882                    | 0.992              | 1.00 (0.88 - 1.12)    | 0.941              | 1.00     | 1.00 (0.84 - 1.15)    | 0.837             | 1.00    | 1.26 (0.68 - 2.30)   | 0.462 | 0.94  |  |  |  |  |  |
| 0.029                      | 0.893                    | 0.92 (0.85 - 1.02) | 0.132                 | 0.997              | 0.92 (0.85 - 1.02) | 0.132                 | 0.997             | 1.00 (0.84 - 1.19) | 0.635                | 0.986                 | 0.92 (0.85 - 1.02) | 0.882                    | 0.992              | 0.94 (0.82 - 1.06)    | 0.309              | 1.00     | 0.96 (0.83 - 1.12)    | 0.653             | 1.00    | 1.17 (0.64 - 2.14)   | 0.615 | 0.926 |  |  |  |  |  |
| 0.865                      | 0.992                    | 0.98 (0.90 - 1.06) | 0.8                   | 0.997              | 1.02 (0.89 - 1.16) | 0.8                   | 0.987             | 1.00 (0.88 - 1.16) | 0.545                | 0.986                 | 0.98 (0.90 - 1.06) | 0.65                     | 0.977              | 1.01 (0.88 - 1.17)    | 0.603              | 1.00     | 0.98 (0.83 - 1.16)    | 0.856             | 1.00    | 1.07 (0.64 - 1.84)   | 0.68  | 0.908 |  |  |  |  |  |
| 0.151                      | 0.933                    | 1.03 (0.94 - 1.13) | 0.522                 | 0.997              | 1.00 (0.96 - 1.12) | 0.516                 | 0.957             | 1.06 (0.83 - 1.34) | 0.655                | 0.986                 | 1.03 (0.94 - 1.12) | 0.51                     | 0.977              | 1.06 (0.92 - 1.11)    | 0.763              | 1.00     | 0.96 (0.82 - 1.12)    | 0.528             | 1.00    | 1.04 (0.76 - 2.57)   | 0.278 | 0.86  |  |  |  |  |  |
| 0.383                      | 0.961                    | 1.02 (0.93 - 1.12) |                       |                    |                    |                       |                   |                    |                      |                       |                    |                          |                    |                       |                    |          |                       |                   |         |                      |       |       |  |  |  |  |  |

|                       |             |                          | Triple negative    |       |                    |                    |          |                       |                    |         |                      |                       |             |                          |
|-----------------------|-------------|--------------------------|--------------------|-------|--------------------|--------------------|----------|-----------------------|--------------------|---------|----------------------|-----------------------|-------------|--------------------------|
| MR PRESSO OR (95% CI) | MR PRESSO P | MR PRESSO FDR-Adjusted P | IWW OR (95% CI)    | IWW P | IWW FDR-Adjusted P | Median OR (95% CI) | Median P | Median FDR-Adjusted P | Egger P (95% CI)   | Egger P | Egger FDR-Adjusted P | MR PRESSO OR (95% CI) | MR PRESSO P | MR PRESSO FDR-Adjusted P |
| 1.10 (0.99 - 1.22)    | 0.159       | 0.992                    | 1.04 (0.96 - 1.13) | 0.243 | 0.999              | 1.00 (0.89 - 1.13) | 0.965    | 1.00                  | 1.00 (0.78 - 1.27) | 0.999   | 1.00                 | 1.04 (0.96 - 1.13)    | 0.332       | 0.985                    |
| 1.01 (0.82 - 1.23)    | 0.956       | 0.992                    | 1.02 (0.92 - 1.12) | 0.635 | 0.999              | 1.05 (0.93 - 1.16) | 0.41     | 1.00                  | 1.05 (0.92 - 1.17) | 0.402   | 1.00                 | 1.02 (0.94 - 1.11)    | 0.629       | 0.999                    |
| 1.02 (0.92 - 1.14)    | 0.687       | 0.992                    | 1.00 (0.92 - 1.09) | 0.972 | 0.999              | 0.97 (0.86 - 1.10) | 0.66     | 1.00                  | 1.01 (0.78 - 1.31) | 0.926   | 1.00                 | 1.00 (0.92 - 1.09)    | 0.972       | 0.999                    |
| 1.10 (0.94 - 1.30)    | 0.298       | 0.992                    | 1.04 (0.96 - 1.13) | 0.381 | 0.999              | 1.00 (0.89 - 1.12) | 0.959    | 1.00                  | 0.91 (0.71 - 1.15) | 0.424   | 1.00                 | 1.04 (0.97 - 1.11)    | 0.288       | 0.974                    |
| 1.05 (0.99 - 1.12)    | 0.162       | 0.992                    | 1.04 (0.96 - 1.13) | 0.381 | 0.999              | 1.01 (0.90 - 1.13) | 0.543    | 1.00                  | 1.01 (0.80 - 1.28) | 0.805   | 1.00                 | 1.03 (0.94 - 1.12)    | 0.544       | 0.999                    |
| 1.03 (0.93 - 1.14)    | 0.621       | 0.992                    | 0.99 (0.91 - 1.08) | 0.846 | 0.999              | 1.03 (0.91 - 1.16) | 0.631    | 1.00                  | 0.98 (0.77 - 1.25) | 0.899   | 1.00                 | 0.99 (0.92 - 1.07)    | 0.884       | 0.999                    |
| 1.00 (0.98 - 1.03)    | 0.831       | 0.994                    | 1.01 (0.93 - 1.10) | 0.733 | 0.999              | 1.01 (0.89 - 1.14) | 0.903    | 1.00                  | 0.96 (0.75 - 1.22) | 0.726   | 1.00                 | 1.01 (0.94 - 1.10)    | 0.719       | 0.999                    |
| 1.06 (0.99 - 1.13)    | 0.182       | 0.992                    | 0.99 (0.91 - 1.07) | 0.732 | 0.999              | 0.98 (0.87 - 1.11) | 0.756    | 1.00                  | 0.96 (0.75 - 1.24) | 0.732   | 1.00                 | 0.99 (0.91 - 1.07)    | 0.735       | 0.999                    |
| 1.12 (1.03 - 1.23)    | 0.058       | 0.992                    | 1.04 (0.96 - 1.13) | 0.367 | 0.999              | 1.05 (0.93 - 1.19) | 0.396    | 1.00                  | 0.94 (0.71 - 1.25) | 0.684   | 1.00                 | 1.04 (0.95 - 1.15)    | 0.376       | 0.997                    |
| 1.08 (0.98 - 1.19)    | 0.177       | 0.992                    | 0.98 (0.90 - 1.06) | 0.629 | 0.999              | 0.95 (0.84 - 1.08) | 0.433    | 1.00                  | 1.08 (0.84 - 1.38) | 0.549   | 1.00                 | 0.98 (0.90 - 1.06)    | 0.633       | 0.999                    |
| 0.97 (0.85 - 1.10)    | 0.647       | 0.992                    | 1.02 (0.94 - 1.10) | 0.706 | 0.999              | 1.07 (0.95 - 1.20) | 0.281    | 1.00                  | 1.33 (1.05 - 1.70) | 0.02    | 1.00                 | 1.02 (0.94 - 1.10)    | 0.686       | 0.999                    |
| 0.86 (0.76 - 0.97)    | 0.064       | 0.992                    | 0.95 (0.88 - 1.03) | 0.244 | 0.999              | 0.95 (0.85 - 1.07) | 0.416    | 1.00                  | 0.92 (0.72 - 1.17) | 0.402   | 1.00                 | 0.95 (0.88 - 1.03)    | 0.218       | 0.947                    |
| 0.88 (0.79 - 0.97)    | 0.058       | 0.992                    | 0.97 (0.89 - 1.05) | 0.469 | 0.999              | 0.97 (0.87 - 1.10) | 0.675    | 1.00                  | 1.00 (0.78 - 1.29) | 0.983   | 1.00                 | 0.97 (0.89 - 1.05)    | 0.476       | 0.999                    |
| 0.92 (0.81 - 1.05)    | 0.278       | 0.992                    | 0.92 (0.85 - 1.00) | 0.049 | 0.893              | 0.91 (0.81 - 1.03) | 0.136    | 1.00                  | 0.95 (0.74 - 1.21) | 0.662   | 1.00                 | 0.92 (0.86 - 0.99)    | 0.029       | 0.577                    |
| 0.99 (0.91 - 1.22)    | 0.362       | 0.998                    | 0.92 (0.85 - 1.02) | 0.142 | 0.999              | 0.95 (0.84 - 1.08) | 0.436    | 1.00                  | 1.04 (0.79 - 1.39) | 0.762   | 1.00                 | 0.93 (0.85 - 1.02)    | 0.154       | 0.886                    |
| 0.99 (0.91 - 1.07)    | 0.769       | 0.992                    | 0.99 (0.91 - 1.08) | 0.847 | 0.999              | 0.96 (0.86 - 1.08) | 0.503    | 1.00                  | 0.94 (0.74 - 1.20) | 0.634   | 1.00                 | 0.99 (0.94 - 1.05)    | 0.784       | 0.999                    |
| 0.96 (0.83 - 1.11)    | 0.618       | 0.992                    | 0.98 (0.88 - 1.08) | 0.651 | 0.999              | 1.05 (0.92 - 1.20) | 0.447    | 1.00                  | 1.20 (0.90 - 1.60) | 0.214   | 1.00                 | 0.98 (0.88 - 1.08)    | 0.655       | 0.999                    |
| 0.97 (0.90 - 1.03)    | 0.374       | 0.992                    | 1.01 (0.93 - 1.10) | 0.791 | 0.999              | 1.02 (0.91 - 1.15) | 0.708    | 1.00                  | 0.94 (0.74 - 1.20) | 0.615   | 1.00                 | 1.01 (0.93 - 1.10)    | 0.789       | 0.999                    |
| 0.91 (0.78 - 1.07)    | 0.32        | 0.992                    | 0.96 (0.88 - 1.05) | 0.362 | 0.999              | 0.93 (0.83 - 1.04) | 0.218    | 1.00                  | 0.80 (0.63 - 1.02) | 0.071   | 1.00                 | 0.96 (0.88 - 1.05)    | 0.337       | 0.997                    |
| 0.96 (0.88 - 1.04)    | 0.38        | 0.992                    | 0.96 (0.88 - 1.04) | 0.301 | 0.999              | 1.01 (0.89 - 1.13) | 0.922    | 1.00                  | 0.96 (0.76 - 1.23) | 0.757   | 1.00                 | 0.96 (0.88 - 1.04)    | 0.293       | 0.974                    |
| 1.06 (0.94 - 1.20)    | 0.408       | 0.992                    | 1.03 (0.95 - 1.12) | 0.502 | 0.999              | 1.03 (0.92 - 1.17) | 0.579    | 1.00                  | 1.18 (0.93 - 1.51) | 0.175   | 1.00                 | 1.03 (0.96 - 1.10)    | 0.416       | 0.997                    |
| 0.94 (0.85 - 1.06)    | 0.269       | 0.992                    | 0.96 (0.88 - 1.04) | 0.35  | 0.999              | 0.95 (0.84 - 1.07) | 0.281    | 1.00                  | 0.87 (0.68 - 1.12) | 0.265   | 1.00                 | 0.96 (0.89 - 1.04)    | 0.321       | 0.981                    |
| 0.99 (0.87 - 1.12)    | 0.827       | 0.999                    | 1.00 (0.92 - 1.09) | 0.997 | 0.999              | 0.95 (0.84 - 1.07) | 0.405    | 1.00                  | 0.80 (0.63 - 1.02) | 0.071   | 1.00                 | 1.00 (0.92 - 1.08)    | 0.997       | 0.999                    |
| 0.97 (0.87 - 1.08)    | 0.645       | 0.992                    | 0.99 (0.88 - 1.10) | 0.798 | 0.999              | 0.95 (0.84 - 1.08) | 0.453    | 1.00                  | 0.87 (0.63 - 1.20) | 0.402   | 1.00                 | 0.99 (0.88 - 1.10)    | 0.8         | 0.999                    |
| 0.94 (0.85 - 1.06)    | 0.359       | 0.992                    | 0.99 (0.91 - 1.08) | 0.818 | 0.999              | 1.00 (0.88 - 1.13) | 0.963    | 1.00                  | 0.84 (0.73 - 1.19) | 0.592   | 1.00                 | 0.99 (0.92 - 1.06)    | 0.785       | 0.999                    |
| 0.99 (0.87 - 1.12)    | 0.827       | 0.999                    | 0.97 (0.89 - 1.05) | 0.436 | 0.999              | 1.01 (0.90 - 1.14) | 0.836    | 1.00                  | 0.95 (0.74 - 1.21) | 0.661   | 1.00                 | 0.97 (0.90 - 1.04)    | 0.364       | 0.997                    |
| 0.97 (0.87 - 1.08)    | 0.645       | 0.992                    | 0.99 (0.91 - 1.08) | 0.828 | 0.999              | 1.01 (0.90 - 1.14) | 0.866    | 1.00                  | 0.97 (0.76 - 1.24) | 0.833   | 1.00                 | 0.99 (0.92 - 1.07)    | 0.806       | 0.999                    |
| 0.98 (0.84 - 1.14)    | 0.811       | 0.992                    | 0.99 (0.88 - 1.08) | 0.828 | 0.999              | 0.99 (0.88 - 1.10) | 0.742    | 1.00                  | 0.93 (0.75 - 1.22) | 0.735   | 1.00                 | 0.93 (0.88 - 0.99)    | 0.041       | 0.607                    |
| 0.96 (0.82 - 1.12)    | 0.628       | 0.992                    | 0.99 (0.86 - 1.02) | 0.108 | 0.999              | 1.02 (0.90 - 1.15) | 0.772    | 1.00                  | 0.99 (0.73 - 1.35) | 0.964   | 1.00                 | 0.98 (0.88 - 1.08)    | 0.689       | 0.999                    |
| 1.10 (0.99 - 1.24)    | 0.162       | 0.992                    | 0.98 (0.88 - 1.08) | 0.685 | 0.999              | 1.02 (0.90 - 1.15) | 0.772    | 1.00                  | 0.99 (0.73 - 1.35) | 0.964   | 1.00                 | 0.98 (0.88 - 1.08)    | 0.689       | 0.999                    |
| 1.03 (0.88 - 1.20)    | 0.718       | 0.992                    | 0.99 (0.92 - 1.08) | 0.89  | 0.999              | 1.08 (0.96 - 1.22) | 0.199    | 1.00                  | 1.12 (0.88 - 1.42) | 0.375   | 1.00                 | 0.99 (0.92 - 1.07)    | 0.876       | 0.999                    |
| 0.94 (0.86 - 1.02)    | 0.211       | 0.992                    | 0.99 (0.90 - 1.09) | 0.823 | 0.999              | 1.08 (0.96 - 1.23) | 0.233    | 1.00                  | 1.25 (0.96 - 1.62) | 0.099   | 1.00                 | 0.99 (0.90 - 1.09)    | 0.825       | 0.999                    |
| 0.97 (0.87 - 1.08)    | 0.58        | 0.992                    | 0.99 (0.92 - 1.09) | 0.823 | 0.999              | 1.01 (0.91 - 1.12) | 0.983    | 1.00                  | 0.99 (0.88 - 1.13) | 0.883   | 1.00                 | 0.99 (0.94 - 1.08)    | 0.815       | 0.999                    |
| 0.99 (0.90 - 1.10)    | 0.885       | 0.996                    | 1.01 (0.93 - 1.10) | 0.839 | 0.999              | 0.88 (0.78 - 0.99) | 0.031    | 1.00                  | 0.89 (0.70 - 1.13) | 0.332   | 1.00                 | 0.93 (0.86 - 1.00)    | 0.051       | 0.706                    |
| 1.00 (0.87 - 1.15)    | 0.977       | 1                        | 0.96 (0.87 - 1.05) | 0.389 | 0.999              | 0.90 (0.80 - 1.01) | 0.08     | 1.00                  | 0.77 (0.59 - 1.01) | 0.056   | 1.00                 | 0.96 (0.87 - 1.05)    | 0.397       | 0.997                    |
| 1.03 (0.89 - 1.19)    | 0.722       | 0.992                    | 0.95 (0.87 - 1.03) | 0.299 | 0.999              | 0.90 (0.80 - 1.01) | 0.08     | 1.00                  | 0.77 (0.59 - 1.01) | 0.056   | 1.00                 | 0.96 (0.87 - 1.05)    | 0.397       | 0.997                    |
| 1.07 (0.93 - 1.24)    | 0.362       | 0.992                    | 0.93 (0.85 - 1.01) | 0.669 | 0.943              | 0.88 (0.78 - 0.99) | 0.031    | 1.00                  | 0.89 (0.70 - 1.13) | 0.332   | 1.00                 | 1.01 (0.95 - 1.08)    | 0.418       | 0.986                    |
| 0.97 (0.88 - 1.06)    | 0.549       | 0.992                    | 0.96 (0.89 - 1.05) | 0.374 | 0.992              | 0.95 (0.85 - 1.06) | 0.372    | 1.00                  | 1.00 (0.79 - 1.28) | 0.988   | 1.00                 | 0.96 (0.91 - 1.02)    | 0.226       | 0.95                     |
| 1.00 (0.92 - 1.08)    | 0.918       | 0.996                    | 1.08 (1.00 - 1.17) | 0.064 | 0.943              | 1.16 (1.03 - 1.31) | 0.012    | 1.00                  | 1.09 (0.86 - 1.39) | 0.469   | 1.00                 | 1.08 (1.00 - 1.17)    | 0.056       | 0.711                    |
| 0.94 (0.88 - 1.00)    | 0.386       | 0.992                    | 0.93 (0.86 - 1.01) | 0.083 | 0.999              | 0.94 (0.84 - 1.05) | 0.267    | 1.00                  | 0.86 (0.67 - 1.09) | 0.267   | 1.00                 | 0.93 (0.87 - 0.99)    | 0.041       | 0.666                    |
| 1.01 (0.88 - 1.16)    | 0.877       | 0.996                    | 1.02 (0.94 - 1.10) | 0.707 | 0.999              | 0.97 (0.87 - 1.08) | 0.661    | 1.00                  | 0.93 (0.73 - 1.19) | 0.573   | 1.00                 | 1.02 (0.95 - 1.09)    | 0.651       | 0.999                    |
| 0.98 (0.88 - 1.09)    | 0.754       | 0.992                    | 0.96 (0.88 - 1.04) | 0.349 | 0.999              | 0.97 (0.86 - 1.08) | 0.565    | 1.00                  | 1.16 (0.91 - 1.48) | 0.222   | 1.00                 | 0.96 (0.89 - 1.03)    | 0.299       | 0.974                    |
| 0.98 (0.86 - 1.13)    | 0.824       | 0.993                    | 0.97 (0.89 - 1.05) | 0.458 | 0.999              | 0.97 (0.86 - 1.09) | 0.581    | 1.00                  | 0.96 (0.75 - 1.22) | 0.748   | 1.00                 | 0.97 (0.91 - 1.03)    | 0.334       | 0.985                    |
| 1.04 (0.97 - 1.11)    | 0.052       | 0.992                    | 0.95 (0.87 - 1.03) | 0.205 | 0.999              | 1.05 (0.93 - 1.18) | 0.407    | 1.00                  | 1.05 (0.81 - 1.35) | 0.107   | 1.00                 | 0.96 (0.86 - 1.05)    | 0.026       | 0.957                    |
| 0.90 (0.83 - 0.97)    | 0.058       | 0.992                    | 0.95 (0.87 - 1.03) | 0.184 | 0.999              | 0.97 (0.87 - 1.09) | 0.639    | 1.00                  | 0.88 (0.69 - 1.12) | 0.3     | 1.00                 | 0.95 (0.89 - 1.00)    | 0.068       | 0.741                    |
| 0.96 (0.90 - 1.01)    | 0.202       | 0.992                    | 0.94 (0.86 - 1.02) | 0.134 | 0.999              | 0.92 (0.82 - 1.04) | 0.18     | 1.00                  | 0.92 (0.73 - 1.18) | 0.525   | 1.00                 | 0.94 (0.88 - 1.00)    | 0.064       | 0.739                    |
| 1.00 (0.90 - 1.10)    | 0.389       | 0.999                    | 0.99 (0.90 - 1.08) | 0.804 | 0.999              | 1.00 (0.89 - 1.11) | 0.963    | 1.00                  | 1.00 (0.96 - 1.04) | 0.804   | 1.00                 | 0.99 (0.95 - 1.09)    | 0.066       | 0.706                    |
| 1.03 (0.92 - 1.16)    | 0.61        | 0.992                    | 1.01 (0.93 - 1.09) | 0.892 | 0.999              | 0.96 (0.85 - 1.08) | 0.479    | 1.00                  | 0.89 (0.70 - 1.13) | 0.34    | 1.00                 | 1.01 (0.93 - 1.09)    | 0.885       | 0.999                    |
| 0.93 (0.89 - 0.97)    | 0.029       | 0.992                    | 0.96 (0.89 - 1.05) | 0.404 | 0.999              | 0.95 (0.85 - 1.07) | 0.435    | 1.00                  | 0.92 (0.72 - 1.18) | 0.515   | 1.00                 | 0.96 (0.89 - 1.05)    | 0.412       | 0.997                    |
| 0.90 (0.78 - 1.03)    | 0.382       | 0.992                    | 0.93 (0.85 - 1.01) | 0.07  | 0.999              | 0.93 (0.82 - 1.05) | 0.118    | 1.00                  | 0.52 (0.32 - 0.82) | 0.033   | 1.00                 | 0.93 (0.87 - 0.99)    | 0.033       | 0.617                    |
| 1.01 (0.93 - 1.11)    | 0.782       | 0.992                    | 1.04 (0.95 - 1.13) | 0.163 | 0.999              | 1.04 (0.93 - 1.17) | 0.479    | 1.00                  | 0.98 (0.84 - 1.05) | 0.534   | 1.00                 | 1.04 (0.95 - 1.13)    | 0.372       | 0.997                    |
| 0.91 (0.86 - 0.96)    | 0.028       | 0.992                    | 0.91 (0.83 - 0.98) | 0.019 | 0.763              | 0.90 (0.80 - 1.00) | 0.06     | 1.00                  | 0.82 (0.64 - 1.05) | 0.112   | 1.00                 | 0.91 (0.85 - 0.97)    | 0.008       | 0.464                    |
| 0.91 (0.84 - 0.99)    | 0.085       | 0.992                    | 0.93 (0.86 - 1.01) | 0.081 | 0.937              | 0.92 (0.82 - 1.03) | 0.141    | 1.00                  | 0.89 (0.70 - 1.13) | 0.346   | 1.00                 | 0.93 (0.86 - 1.00)    | 0.058       | 0.711                    |
| 0.96 (0.77 - 1.19)    | 0.594       | 0.992                    | 0.99 (0.89 - 1.08) | 0.84  | 0.999              | 1.00 (0.89 - 1.13) | 0.977    | 1.00                  | 1.00 (0.87 - 1.16) | 0.977   | 1.00                 | 0.99 (0.92 - 1.07)    | 0.822       | 0.986                    |
| 1.00 (0.92 - 1.09)    | 0.96        | 0.998                    | 1.04 (0.96 - 1.13) | 0.3   | 0.999              | 1.08 (0.96 - 1.22) | 0.206    | 1.00                  | 0.93 (0.73 - 1.18) | 0.529   | 1.00                 | 1.04 (0.97 - 1.12)    | 0.248       | 0.965                    |
| 1.04 (0.93 - 1.16)    | 0.57        | 0.992                    | 0.97 (0.89 - 1.06) | 0.503 | 0.999              | 0.97 (0.86 - 1.10) | 0.65     | 1.00                  | 0.99 (0.78 - 1.26) | 0.932   | 1.00                 | 0.97 (0.90 - 1.05)    | 0.484       | 0.999                    |
| 0.96 (0.85 - 1.08)    | 0.549       | 0.992                    | 0.96 (0.88 - 1.04) | 0.235 | 0.999              | 0.94 (0.84 - 1.05) | 0.247    | 1.00                  | 0.52 (0.32 - 0.82) | 0.033   | 1.00                 | 0.96 (0.91 - 1.02)    | 0.178       | 0.902                    |
| 0.90 (0.83 - 0.98)    | 0.073       | 0.992                    | 0.99 (0.90 - 1.09) | 0.909 | 0.999              | 1.01 (0.90 - 1.14) | 0.845    | 1.00                  | 0.87 (0.66 - 1.15) | 0.318   | 1.00                 | 0.99 (0.90 - 1.09)    | 0.91        | 0.999                    |
| 0.91 (0.77 - 1.08)    | 0.338       | 0.992                    | 0.92 (0.85 - 1.01) | 0.072 | 0.944              | 0.91 (0.81 - 1.03) | 0.121    | 1.00                  | 0.79 (0.61 - 1.01) | 0.062   | 1.00                 | 0.92 (0.85 - 1.01)    | 0.084       | 0.785                    |
| 1.01 (0.86 - 1.20)    | 0.893       | 0.996                    | 1.00 (0.92 - 1.09) | 0.978 | 0.999              | 0.99 (0.88 - 1.11) | 0.853    | 1.00                  | 0.95 (0.74 - 1.21) | 0.66    | 1.00                 | 1.00 (0.92 - 1.08)    | 0           |                          |
