# Supplementary material
Source: PubMed Central journal article supplement (PMC9553869)
Supplement: 41416_2022_1923_MOESM5_ESM.pdf [file 41416_2022_1923_MOESM5_ESM.pdf]

S5 Table. The pQTL of eight proteins showed a moderate linkage disequilibrium (LD) with previously identified breast cancer variants

| Protein | Breast cancer susceptibility variants | PMID     | LD ( $r^2$ ) |
|---------|---------------------------------------|----------|--------------|
| GP1BA   | rs11065822                            | 32424353 | 0.254788     |
| IL2RB   | rs11065822                            | 32424353 | 0.321178     |
| VCAM1   | rs11065822                            | 32424353 | 0.321178     |
| ICAM2   | rs11065822                            | 32424353 | 0.321178     |
| KDELC2  | rs74911261                            | 29058716 | 0.470168     |
| LAG3    | rs11065822                            | 32424353 | 0.320864     |
| MICB    | rs71557345                            | 29059683 | 0.628132     |
| PDGFRL  | rs6796502                             | 29059683 | 0.521154     |
